# Supplementary material for: An integrative machine learning approach for prediction of toxicity-related drug safety
Source: Life Sci Alliance. 2018 Nov 28;1(6):e201800098. doi: 10.26508/lsa.201800098 (PMC6262234; doi:10.26508/lsa.201800098)
Supplement: Supplementary file 1 [file LSA-2018-00098_TableS1.xlsx]

## Sheet: enrichment-biological_process
Cluster	GO Id	GO Name	Term IC	Count	Proportion	p-value (Fisher's exact test)	p-value(adjusted)
1	GO:0018212	peptidyl-tyrosine modification	7.06563	44	0.862745	1.57742e-33	4.01769e-30
1	GO:0018108	peptidyl-tyrosine phosphorylation	7.06563	44	0.862745	1.57742e-33	4.01769e-30
1	GO:0018193	peptidyl-amino acid modification	6.21538	46	0.901961	9.53207e-25	1.21391e-21
1	GO:0046777	protein autophosphorylation	7.2381	37	0.72549	2.10207e-23	1.78466e-20
1	GO:0007167	enzyme linked receptor protein signaling pathway	5.48067	34	0.666667	1.31559e-10	4.18851e-08
1	GO:0007169	transmembrane receptor protein tyrosine kinase signaling pathway	5.71554	31	0.607843	8.82619e-10	1.87336e-07
1	GO:0002376	immune system process	4.05551	37	0.72549	8.37399e-09	1.33303e-06
1	GO:0007166	cell surface receptor signaling pathway	4.3512	45	0.882353	1.17725e-08	1.66581e-06
1	GO:0048584	positive regulation of response to stimulus	4.19579	38	0.745098	4.30193e-08	4.21424e-06
1	GO:0048583	regulation of response to stimulus	3.30849	45	0.882353	4.17244e-08	4.25088e-06
1	GO:0050776	regulation of immune response	4.92998	29	0.568627	4.82566e-08	4.55221e-06
1	GO:0043408	regulation of MAPKKK cascade	5.98656	27	0.529412	7.36705e-08	6.25462e-06
1	GO:0014068	positive regulation of phosphatidylinositol 3-kinase cascade	9.51494	10	0.196078	1.41118e-07	9.21611e-06
1	GO:0014066	regulation of phosphatidylinositol 3-kinase cascade	9.51494	10	0.196078	1.41118e-07	9.21611e-06
1	GO:0043552	positive regulation of phosphatidylinositol 3-kinase activity	9.51494	10	0.196078	1.41118e-07	9.21611e-06
1	GO:0090218	positive regulation of lipid kinase activity	9.51494	10	0.196078	1.41118e-07	9.21611e-06
1	GO:0002764	immune response-regulating signaling pathway	5.2496	24	0.470588	3.94265e-07	2.23154e-05
1	GO:0043085	positive regulation of catalytic activity	5.5359	30	0.588235	4.29501e-07	2.32753e-05
1	GO:0043410	positive regulation of MAPKKK cascade	6.78912	22	0.431373	1.20742e-06	5.30224e-05
1	GO:0002768	immune response-regulating cell surface receptor signaling pathway	7.2381	20	0.392157	1.23378e-06	5.32619e-05
1	GO:0043551	regulation of phosphatidylinositol 3-kinase activity	9.30849	10	0.196078	1.20258e-06	5.37362e-05
1	GO:0009966	regulation of signal transduction	4.22103	39	0.764706	1.12148e-06	5.49309e-05
1	GO:0042325	regulation of phosphorylation	4.94392	32	0.627451	1.42554e-06	5.76327e-05
1	GO:0010740	positive regulation of intracellular protein kinase cascade	6.10686	25	0.490196	1.50246e-06	5.97933e-05
1	GO:0009967	positive regulation of signal transduction	5.37618	31	0.607843	1.64421e-06	6.25044e-05
1	GO:0016477	cell migration	6.63042	21	0.411765	2.41103e-06	8.18786e-05
1	GO:0042327	positive regulation of phosphorylation	6.46049	27	0.529412	2.74887e-06	9.09269e-05
1	GO:0043550	regulation of lipid kinase activity	9.21538	10	0.196078	2.88835e-06	9.43156e-05
1	GO:0042531	positive regulation of tyrosine phosphorylation of STAT protein	9.40803	7	0.137255	3.34724e-06	0.000103969
1	GO:0006955	immune response	6.09644	28	0.54902	3.40206e-06	0.000104398
1	GO:0051674	localization of cell	6.61547	21	0.411765	3.30405e-06	0.000105193
1	GO:0048870	cell motility	6.61547	21	0.411765	3.30405e-06	0.000105193
1	GO:0030335	positive regulation of cell migration	7.28464	16	0.313725	3.29484e-06	0.000106227
1	GO:0008284	positive regulation of cell proliferation	6.32056	24	0.470588	4.07341e-06	0.000122059
1	GO:0023056	positive regulation of signaling	5.30849	31	0.607843	4.92843e-06	0.000137942
1	GO:0010647	positive regulation of cell communication	5.30249	31	0.607843	4.92843e-06	0.000137942
1	GO:0010627	regulation of intracellular protein kinase cascade	5.40803	28	0.54902	5.4148e-06	0.000148296
1	GO:0023051	regulation of signaling	4.04295	40	0.784314	5.85771e-06	0.000155412
1	GO:0010646	regulation of cell communication	4.39201	40	0.784314	5.85771e-06	0.000155412
1	GO:0006928	cellular component movement	6.30849	24	0.470588	6.88628e-06	0.000171955
1	GO:0045087	innate immune response	6.70759	25	0.490196	7.22687e-06	0.000176989
1	GO:2000147	positive regulation of cell motility	7.2381	16	0.313725	7.40553e-06	0.000177942
1	GO:0051272	positive regulation of cellular component movement	7.2381	16	0.313725	7.40553e-06	0.000177942
1	GO:0044093	positive regulation of molecular function	5.14392	32	0.627451	7.77189e-06	0.000183287
1	GO:0070372	regulation of ERK1 and ERK2 cascade	8.12792	14	0.27451	1.02252e-05	0.000230474
1	GO:0019221	cytokine-mediated signaling pathway	8.3574	12	0.235294	1.0741e-05	0.00023789
1	GO:0019220	regulation of phosphate metabolic process	4.80599	33	0.647059	1.15252e-05	0.000250894
1	GO:0051174	regulation of phosphorus metabolic process	4.80599	33	0.647059	1.15252e-05	0.000250894
1	GO:0046427	positive regulation of JAK-STAT cascade	9.21538	7	0.137255	1.35397e-05	0.000273696
1	GO:0042509	regulation of tyrosine phosphorylation of STAT protein	8.96745	7	0.137255	1.35397e-05	0.000273696
1	GO:0043549	regulation of kinase activity	6.00593	25	0.490196	1.48488e-05	0.000295468
1	GO:0001525	angiogenesis	8.0861	14	0.27451	1.57158e-05	0.000303244
1	GO:0040017	positive regulation of locomotion	7.0861	16	0.313725	1.56525e-05	0.000304328
1	GO:0050731	positive regulation of peptidyl-tyrosine phosphorylation	8.75595	9	0.176471	1.61738e-05	0.000309735
1	GO:0040011	locomotion	6.07583	23	0.45098	1.76817e-05	0.000326343
1	GO:0033674	positive regulation of kinase activity	6.3952	21	0.411765	1.86722e-05	0.000337292
1	GO:0048514	blood vessel morphogenesis	7.48746	15	0.294118	1.96333e-05	0.000347265
1	GO:0050790	regulation of catalytic activity	5.09126	33	0.647059	2.02756e-05	0.000356152
1	GO:0022603	regulation of anatomical structure morphogenesis	6.50114	18	0.352941	2.35999e-05	0.000392869
1	GO:0050793	regulation of developmental process	4.55717	34	0.666667	2.33105e-05	0.000393191
1	GO:0035924	cellular response to vascular endothelial growth factor stimulus	10.408	6	0.117647	2.48647e-05	0.000403379
1	GO:0051338	regulation of transferase activity	5.93926	25	0.490196	2.93333e-05	0.000450072
1	GO:0034641	cellular nitrogen compound metabolic process	4.67622	6	0.117647	4.07115e-05	0.000554504
1	GO:0045937	positive regulation of phosphate metabolic process	6.29652	27	0.529412	4.03664e-05	0.000555747
1	GO:0010562	positive regulation of phosphorus metabolic process	6.29652	27	0.529412	4.03664e-05	0.000555747
1	GO:0007498	mesoderm development	9.30849	8	0.156863	4.06749e-05	0.000556984
1	GO:0002429	immune response-activating cell surface receptor signaling pathway	7.92998	13	0.254902	4.13124e-05	0.000559695
1	GO:0051347	positive regulation of transferase activity	6.33274	21	0.411765	5.18665e-05	0.000657233
1	GO:0001568	blood vessel development	7.21538	15	0.294118	5.70562e-05	0.000705447
1	GO:0006725	cellular aromatic compound metabolic process	5.94859	6	0.117647	7.57939e-05	0.000873517
1	GO:0050900	leukocyte migration	8.0861	10	0.196078	7.5232e-05	0.000878972
1	GO:0030334	regulation of cell migration	6.54296	18	0.352941	7.44245e-05	0.000881671
1	GO:0046425	regulation of JAK-STAT cascade	8.69182	7	0.137255	0.000100271	0.0010776
1	GO:0046483	heterocycle metabolic process	5.62292	6	0.117647	0.000102708	0.00108098
1	GO:0022610	biological adhesion	7.66079	14	0.27451	0.000102562	0.00108393
1	GO:0007155	cell adhesion	7.66079	14	0.27451	0.000102562	0.00108393
1	GO:0002682	regulation of immune system process	4.36676	30	0.588235	0.000103465	0.00108446
1	GO:0002757	immune response-activating signal transduction	5.3952	17	0.333333	0.000104738	0.00108884
1	GO:0002253	activation of immune response	5.3952	17	0.333333	0.000104738	0.00108884
1	GO:0051345	positive regulation of hydrolase activity	7.21538	16	0.313725	0.000109016	0.00111511
1	GO:0001944	vasculature development	7.02556	15	0.294118	0.000108693	0.0011163
1	GO:2000145	regulation of cell motility	6.43402	19	0.372549	0.00011236	0.00113115
1	GO:0006139	nucleobase-containing compound metabolic process	4.75595	6	0.117647	0.000119358	0.00119217
1	GO:0030154	cell differentiation	4.04546	34	0.666667	0.000126947	0.00125811
1	GO:0001934	positive regulation of protein phosphorylation	6.64553	22	0.431373	0.000135078	0.00132325
1	GO:0048534	hemopoietic or lymphoid organ development	6.46049	17	0.333333	0.000137341	0.00133007
1	GO:0006807	nitrogen compound metabolic process	4.61547	8	0.156863	0.000162805	0.00150787
1	GO:0048856	anatomical structure development	2.86998	39	0.764706	0.00016217	0.00151299
1	GO:0048869	cellular developmental process	4.03051	34	0.666667	0.000174026	0.0015944
1	GO:2000249	regulation of actin cytoskeleton reorganization	10.6304	5	0.0980392	0.000177625	0.00161576
1	GO:0008360	regulation of cell shape	10.6304	5	0.0980392	0.000177625	0.00161576
1	GO:0045834	positive regulation of lipid metabolic process	8.30849	11	0.215686	0.00018158	0.00163422
1	GO:0051270	regulation of cellular component movement	6.38249	19	0.372549	0.000181573	0.00163995
1	GO:0065009	regulation of molecular function	4.60805	35	0.686275	0.000185561	0.00165253
1	GO:0050730	regulation of peptidyl-tyrosine phosphorylation	8.12792	10	0.196078	0.000197573	0.00172927
1	GO:0002520	immune system development	6.3952	17	0.333333	0.000230505	0.00195699
1	GO:0040012	regulation of locomotion	6.27287	19	0.372549	0.000286408	0.00233061
1	GO:0001932	regulation of protein phosphorylation	5.12792	26	0.509804	0.000289978	0.00235215
1	GO:0007165	signal transduction	3.17646	48	0.941176	0.000299341	0.00240512
1	GO:0006952	defense response	5.92076	25	0.490196	0.000316886	0.00251436
1	GO:0030097	hemopoiesis	6.64553	16	0.313725	0.000323681	0.00254449
1	GO:0050778	positive regulation of immune response	5.31451	17	0.333333	0.000375384	0.00282871
1	GO:0044249	cellular biosynthetic process	4.49087	6	0.117647	0.000381213	0.00285574
1	GO:0060326	cell chemotaxis	8.57153	7	0.137255	0.000421173	0.0031184
1	GO:0048518	positive regulation of biological process	2.52976	44	0.862745	0.000552034	0.00389482
1	GO:0071345	cellular response to cytokine stimulus	7.66079	12	0.235294	0.00060977	0.00422034
1	GO:0032502	developmental process	2.7066	40	0.784314	0.000627114	0.00427075
1	GO:0048522	positive regulation of cellular process	3.09514	42	0.823529	0.000766123	0.00506835
1	GO:0050851	antigen receptor-mediated signaling pathway	8.63042	9	0.176471	0.000764247	0.00506911
1	GO:0002697	regulation of immune effector process	8.0861	9	0.176471	0.000764247	0.00506911
1	GO:0070374	positive regulation of ERK1 and ERK2 cascade	8.75595	9	0.176471	0.000764247	0.00506911
1	GO:0048731	system development	3.14392	36	0.705882	0.000804176	0.00523846
1	GO:0051094	positive regulation of developmental process	5.95799	21	0.411765	0.000804131	0.00525159
1	GO:0045859	regulation of protein kinase activity	6.18196	21	0.411765	0.000804131	0.00525159
1	GO:0090304	nucleic acid metabolic process	5.55717	6	0.117647	0.000868998	0.00558924
1	GO:0009653	anatomical structure morphogenesis	4.37618	26	0.509804	0.000918221	0.00583219
1	GO:0023052	signaling	3.04671	48	0.941176	0.000950095	0.00596032
1	GO:0009888	tissue development	4.99138	20	0.392157	0.000984803	0.00613275
1	GO:0048646	anatomical structure formation involved in morphogenesis	6.40803	16	0.313725	0.00105104	0.00643508
1	GO:0002703	regulation of leukocyte mediated immunity	9.40803	6	0.117647	0.00107225	0.00653353
1	GO:0048013	ephrin receptor signaling pathway	9.75595	6	0.117647	0.00107225	0.00653353
1	GO:0009058	biosynthetic process	4.39201	7	0.137255	0.0010776	0.00655046
1	GO:0035295	tube development	6.55717	12	0.235294	0.0010974	0.00660777
1	GO:0031401	positive regulation of protein modification process	6.26119	22	0.431373	0.0010964	0.0066174
1	GO:0007049	cell cycle	6.38249	2	0.0392157	0.00114434	0.00682587
1	GO:0042221	response to chemical stimulus	3.2267	40	0.784314	0.00120882	0.00712699
1	GO:0042517	positive regulation of tyrosine phosphorylation of Stat3 protein	10.8935	4	0.0784314	0.00121228	0.0071309
1	GO:0007154	cell communication	3.01448	48	0.941176	0.00125601	0.00737112
1	GO:0060191	regulation of lipase activity	8.0861	10	0.196078	0.00133362	0.00770234
1	GO:0033628	regulation of cell adhesion mediated by integrin	10.2154	5	0.0980392	0.00134304	0.00770435
1	GO:0002009	morphogenesis of an epithelium	6.84034	11	0.215686	0.00143178	0.00808592
1	GO:0030155	regulation of cell adhesion	8.00593	11	0.215686	0.00143178	0.00808592
1	GO:2000026	regulation of multicellular organismal development	4.9116	27	0.529412	0.00147726	0.00823323
1	GO:0080134	regulation of response to stress	4.70363	24	0.470588	0.00153372	0.0084737
1	GO:0051336	regulation of hydrolase activity	6.82306	17	0.333333	0.00168356	0.00916247
1	GO:0023014	signal transduction by phosphorylation	7.75595	13	0.254902	0.00178048	0.00956726
1	GO:0051128	regulation of cellular component organization	5.52888	24	0.470588	0.00178604	0.00957694
1	GO:0070887	cellular response to chemical stimulus	4.28169	33	0.647059	0.00182244	0.00971077
1	GO:0002521	leukocyte differentiation	7.19301	12	0.235294	0.00187689	0.00987692
1	GO:0042127	regulation of cell proliferation	5.47391	25	0.490196	0.00187369	0.00988052
1	GO:0031399	regulation of protein modification process	4.93461	26	0.509804	0.00193217	0.0100845
1	GO:0032270	positive regulation of cellular protein metabolic process	6.09644	23	0.45098	0.00194984	0.0101559
1	GO:0016337	cell-cell adhesion	9.04546	7	0.137255	0.00203799	0.0105076
1	GO:0050865	regulation of cell activation	6.85783	14	0.27451	0.00205309	0.0105216
1	GO:0045088	regulation of innate immune response	5.52888	13	0.254902	0.00225466	0.011349
1	GO:0032989	cellular component morphogenesis	6.60067	17	0.333333	0.00245505	0.0121418
1	GO:0048468	cell development	5.48067	22	0.431373	0.00245401	0.0121603
1	GO:0051276	chromosome organization	5.85783	2	0.0392157	0.00266769	0.0130666
1	GO:0032956	regulation of actin cytoskeleton organization	8.69182	8	0.156863	0.00273743	0.0133058
1	GO:0051239	regulation of multicellular organismal process	3.84469	35	0.686275	0.00283837	0.0136919
1	GO:0007243	intracellular protein kinase cascade	6.32056	17	0.333333	0.00294209	0.0140065
1	GO:0043406	positive regulation of MAP kinase activity	7.82306	12	0.235294	0.00306907	0.0145026
1	GO:0010518	positive regulation of phospholipase activity	8.40803	9	0.176471	0.00313171	0.0147167
1	GO:0010517	regulation of phospholipase activity	8.40803	9	0.176471	0.00313171	0.0147167
1	GO:0043405	regulation of MAP kinase activity	7.48746	14	0.27451	0.00314351	0.014745
1	GO:0010033	response to organic substance	3.8145	35	0.686275	0.00319981	0.014954
1	GO:0007275	multicellular organismal development	2.95682	37	0.72549	0.0032141	0.0149933
1	GO:0048729	tissue morphogenesis	6.42097	11	0.215686	0.00323305	0.0150541
1	GO:0051246	regulation of protein metabolic process	4.48746	29	0.568627	0.00326455	0.0151178
1	GO:0050867	positive regulation of cell activation	7.57153	10	0.196078	0.00327409	0.0151345
1	GO:0043299	leukocyte degranulation	10.6304	4	0.0784314	0.00328159	0.0151417
1	GO:0048286	lung alveolus development	10.6304	4	0.0784314	0.00328159	0.0151417
1	GO:0042516	regulation of tyrosine phosphorylation of Stat3 protein	10.6304	4	0.0784314	0.00328159	0.0151417
1	GO:0007259	JAK-STAT cascade	9.63042	4	0.0784314	0.00328159	0.0151417
1	GO:0071310	cellular response to organic substance	4.66079	30	0.588235	0.0040435	0.0175747
1	GO:0060193	positive regulation of lipase activity	8.30849	9	0.176471	0.00422082	0.0181902
1	GO:0001817	regulation of cytokine production	5.73965	13	0.254902	0.00434616	0.0186987
1	GO:0006325	chromatin organization	6.27287	2	0.0392157	0.00460486	0.0195803
1	GO:0035556	intracellular signal transduction	5.06563	32	0.627451	0.00461523	0.0195916
1	GO:0051247	positive regulation of protein metabolic process	5.85783	23	0.45098	0.00464593	0.0196892
1	GO:0051716	cellular response to stimulus	2.63042	48	0.941176	0.00478148	0.020163
1	GO:0019216	regulation of lipid metabolic process	7.48746	12	0.235294	0.00482228	0.0202345
1	GO:0000904	cell morphogenesis involved in differentiation	6.78912	15	0.294118	0.00487281	0.0203794
1	GO:0002431	Fc receptor mediated stimulatory signaling pathway	9.40803	6	0.117647	0.00506714	0.0210539
1	GO:0030036	actin cytoskeleton organization	9.30849	6	0.117647	0.00506714	0.0210539
1	GO:0032970	regulation of actin filament-based process	8.57153	8	0.156863	0.00532438	0.0218377
1	GO:0002696	positive regulation of leukocyte activation	7.69182	9	0.176471	0.00558844	0.0225933
1	GO:0032268	regulation of cellular protein metabolic process	4.79753	27	0.529412	0.00558134	0.0226364
1	GO:0030030	cell projection organization	6.92998	14	0.27451	0.00565017	0.0227346
1	GO:0060429	epithelium development	6.02556	14	0.27451	0.00565017	0.0227346
1	GO:0002684	positive regulation of immune system process	4.91617	17	0.333333	0.00578737	0.0231768
1	GO:0002694	regulation of leukocyte activation	7.04546	12	0.235294	0.00596296	0.0237307
1	GO:0071902	positive regulation of protein serine/threonine kinase activity	7.43402	13	0.254902	0.00647228	0.0253614
1	GO:0051249	regulation of lymphocyte activation	7.2381	11	0.215686	0.00655243	0.025636
1	GO:0034645	cellular macromolecule biosynthetic process	6.48746	5	0.0980392	0.00665321	0.0259109
1	GO:0045860	positive regulation of protein kinase activity	6.57153	15	0.294118	0.00691793	0.0266969
1	GO:0050764	regulation of phagocytosis	10.408	4	0.0784314	0.00691101	0.0267107
1	GO:0048008	platelet-derived growth factor receptor signaling pathway	10.408	4	0.0784314	0.00691101	0.0267107
1	GO:0045055	regulated secretory pathway	10.408	4	0.0784314	0.00691101	0.0267107
1	GO:0034103	regulation of tissue remodeling	10.408	4	0.0784314	0.00691101	0.0267107
1	GO:0050853	B cell receptor signaling pathway	10.408	4	0.0784314	0.00691101	0.0267107
1	GO:0021675	nerve development	10.408	4	0.0784314	0.00691101	0.0267107
1	GO:0070848	response to growth factor stimulus	6.89345	16	0.313725	0.00690793	0.0267394
1	GO:0071900	regulation of protein serine/threonine kinase activity	6.98656	16	0.313725	0.00690793	0.0267394
1	GO:0022604	regulation of cell morphogenesis	8.3574	8	0.156863	0.00717515	0.0275227
1	GO:0030029	actin filament-based process	9.21538	6	0.117647	0.00759482	0.0286578
1	GO:0030238	male sex determination	11.2154	3	0.0588235	0.00781684	0.0293218
1	GO:0001945	lymph vessel development	11.2154	3	0.0588235	0.00781684	0.0293218
1	GO:0042523	positive regulation of tyrosine phosphorylation of Stat5 protein	11.2154	3	0.0588235	0.00781684	0.0293218
1	GO:0071378	cellular response to growth hormone stimulus	11.2154	3	0.0588235	0.00781684	0.0293218
1	GO:0033003	regulation of mast cell activation	11.2154	3	0.0588235	0.00781684	0.0293218
1	GO:0043300	regulation of leukocyte degranulation	10.8935	3	0.0588235	0.00781684	0.0293218
1	GO:0060396	growth hormone receptor signaling pathway	11.2154	3	0.0588235	0.00781684	0.0293218
1	GO:0045577	regulation of B cell differentiation	11.2154	3	0.0588235	0.00781684	0.0293218
1	GO:0017145	stem cell division	11.2154	3	0.0588235	0.00781684	0.0293218
1	GO:0048103	somatic stem cell division	11.2154	3	0.0588235	0.00781684	0.0293218
1	GO:0046850	regulation of bone remodeling	11.2154	3	0.0588235	0.00781684	0.0293218
1	GO:0002532	production of molecular mediator involved in inflammatory response	11.2154	3	0.0588235	0.00781684	0.0293218
1	GO:0060416	response to growth hormone stimulus	11.2154	3	0.0588235	0.00781684	0.0293218
1	GO:0060397	JAK-STAT cascade involved in growth hormone signaling pathway	11.2154	3	0.0588235	0.00781684	0.0293218
1	GO:0002886	regulation of myeloid leukocyte mediated immunity	10.8935	3	0.0588235	0.00781684	0.0293218
1	GO:0051179	localization	4.62292	27	0.529412	0.00798355	0.0297717
1	GO:0044271	cellular nitrogen compound biosynthetic process	6.43402	5	0.0980392	0.00841182	0.0308716
1	GO:0043010	camera-type eye development	8.04546	8	0.156863	0.00947933	0.0341497
1	GO:0072359	circulatory system development	5.93926	16	0.313725	0.00946713	0.0341541
1	GO:0072358	cardiovascular system development	5.93926	16	0.313725	0.00946713	0.0341541
1	GO:0007186	G-protein coupled receptor signaling pathway	6.84034	3	0.0588235	0.0101581	0.0361349
1	GO:0019438	aromatic compound biosynthetic process	6.75595	5	0.0980392	0.010588	0.0374029
1	GO:0018130	heterocycle biosynthetic process	6.52888	5	0.0980392	0.010588	0.0374029
1	GO:0006935	chemotaxis	7.10686	12	0.235294	0.0107351	0.0377136
1	GO:0000165	MAPKKK cascade	6.80599	12	0.235294	0.0107351	0.0377136
1	GO:0042330	taxis	7.10686	12	0.235294	0.0107351	0.0377136
1	GO:0048513	organ development	3.72353	28	0.54902	0.0109393	0.0381678
1	GO:0045619	regulation of lymphocyte differentiation	8.63042	6	0.117647	0.0109289	0.0381838
1	GO:0030323	respiratory tube development	8.17099	6	0.117647	0.0109289	0.0381838
1	GO:0030324	lung development	8.17099	6	0.117647	0.0109289	0.0381838
1	GO:0045785	positive regulation of cell adhesion	9.21538	6	0.117647	0.0109289	0.0381838
1	GO:0000902	cell morphogenesis	6.66079	15	0.294118	0.0112556	0.0390042
1	GO:0051172	negative regulation of nitrogen compound metabolic process	6.80599	3	0.0588235	0.011475	0.0394425
1	GO:0030098	lymphocyte differentiation	7.66079	9	0.176471	0.0118244	0.0403171
1	GO:0034654	nucleobase-containing compound biosynthetic process	6.51494	5	0.0980392	0.0118588	0.0403802
1	GO:0007409	axonogenesis	7.38249	11	0.215686	0.0121438	0.0411308
1	GO:0050870	positive regulation of T cell activation	8.12792	7	0.137255	0.0121421	0.0411795
1	GO:0051251	positive regulation of lymphocyte activation	7.78912	8	0.156863	0.0123005	0.0415509
1	GO:0035239	tube morphogenesis	7.38249	8	0.156863	0.0123005	0.0415509
1	GO:0060562	epithelial tube morphogenesis	7.82306	8	0.156863	0.0123005	0.0415509
1	GO:2001235	positive regulation of apoptotic signaling pathway	9.63042	5	0.0980392	0.0124868	0.0420131
1	GO:0030100	regulation of endocytosis	9.40803	5	0.0980392	0.0124868	0.0420131
1	GO:0048839	inner ear development	9.30849	5	0.0980392	0.0124868	0.0420131
1	GO:2001239	regulation of extrinsic apoptotic signaling pathway in absence of ligand	10.2154	4	0.0784314	0.012479	0.0420423
1	GO:0097202	activation of cysteine-type endopeptidase activity	10.2154	4	0.0784314	0.012479	0.0420423
1	GO:0031638	zymogen activation	10.2154	4	0.0784314	0.012479	0.0420423
1	GO:0006919	activation of cysteine-type endopeptidase activity involved in apoptotic process	10.2154	4	0.0784314	0.012479	0.0420423
1	GO:0010976	positive regulation of neuron projection development	10.2154	4	0.0784314	0.012479	0.0420423
1	GO:0031323	regulation of cellular metabolic process	3.47729	39	0.764706	0.0126451	0.0424335
1	GO:0031347	regulation of defense response	5.19857	16	0.313725	0.0127496	0.0426158
1	GO:0009887	organ morphogenesis	5.85783	12	0.235294	0.0128648	0.0428882
1	GO:0034097	response to cytokine stimulus	7.19301	12	0.235294	0.0128648	0.0428882
1	GO:0045934	negative regulation of nucleobase-containing compound metabolic process	6.84034	3	0.0588235	0.0129488	0.0429436
1	GO:0071363	cellular response to growth factor stimulus	6.92998	15	0.294118	0.0131109	0.0432559
1	GO:0008283	cell proliferation	6.94859	13	0.254902	0.0132233	0.0435701
1	GO:0048666	neuron development	6.75595	13	0.254902	0.0132233	0.0435701
1	GO:0014070	response to organic cyclic compound	6.63042	5	0.0980392	0.0132672	0.0436582
1	GO:0043067	regulation of programmed cell death	5.78075	24	0.470588	0.0144203	0.0465506
1	GO:0007423	sensory organ development	7.28464	9	0.176471	0.0147766	0.0473409
1	GO:0048545	response to steroid hormone stimulus	7.0861	2	0.0392157	0.0148656	0.0475662
1	GO:0048705	skeletal system morphogenesis	8.69182	6	0.117647	0.0151919	0.0484277
1	GO:0060541	respiratory system development	7.96745	6	0.117647	0.0151919	0.0484277
1	GO:0050852	T cell receptor signaling pathway	9.12792	6	0.117647	0.0151919	0.0484277
1	GO:0001654	eye development	7.92998	8	0.156863	0.0157025	0.0496206
1	GO:0006909	phagocytosis	8.75595	7	0.137255	0.0160047	0.0502638
1	GO:0030217	T cell differentiation	8.26119	7	0.137255	0.0160047	0.0502638
1	GO:0010941	regulation of cell death	5.75595	24	0.470588	0.0161106	0.050534
1	GO:0019222	regulation of metabolic process	3.14124	40	0.784314	0.0163778	0.0513089
1	GO:0071375	cellular response to peptide hormone stimulus	7.92998	10	0.196078	0.0164912	0.0515377
1	GO:0009059	macromolecule biosynthetic process	6.46049	6	0.117647	0.0174706	0.0536763
1	GO:0048667	cell morphogenesis involved in neuron differentiation	7.21538	11	0.215686	0.0175598	0.0538854
1	GO:0071840	cellular component organization or biogenesis	4.20136	34	0.666667	0.0176853	0.0541401
1	GO:0016043	cellular component organization	4.20415	34	0.666667	0.0176853	0.0541401
1	GO:0002448	mast cell mediated immunity	10.8935	3	0.0588235	0.0177237	0.0541923
1	GO:0034122	negative regulation of toll-like receptor signaling pathway	10.6304	3	0.0588235	0.0177237	0.0541923
1	GO:0042522	regulation of tyrosine phosphorylation of Stat5 protein	10.8935	3	0.0588235	0.0177237	0.0541923
1	GO:0002279	mast cell activation involved in immune response	10.8935	3	0.0588235	0.0177237	0.0541923
1	GO:2001238	positive regulation of extrinsic apoptotic signaling pathway	10.8935	3	0.0588235	0.0177237	0.0541923
1	GO:0007530	sex determination	10.8935	3	0.0588235	0.0177237	0.0541923
1	GO:0070306	lens fiber cell differentiation	10.8935	3	0.0588235	0.0177237	0.0541923
1	GO:0043303	mast cell degranulation	10.8935	3	0.0588235	0.0177237	0.0541923
1	GO:0045576	mast cell activation	10.8935	3	0.0588235	0.0177237	0.0541923
1	GO:0034109	homotypic cell-cell adhesion	10.8935	3	0.0588235	0.0177237	0.0541923
1	GO:0002444	myeloid leukocyte mediated immunity	10.8935	3	0.0588235	0.0177237	0.0541923
1	GO:0031175	neuron projection development	7.06563	12	0.235294	0.0181017	0.0550181
1	GO:0043583	ear development	9.04546	5	0.0980392	0.0182786	0.0552917
1	GO:0016070	RNA metabolic process	6.63042	5	0.0980392	0.0184507	0.0557462
1	GO:0080090	regulation of primary metabolic process	3.52189	38	0.745098	0.0193115	0.0575953
1	GO:0010604	positive regulation of macromolecule metabolic process	4.93461	29	0.568627	0.0196774	0.058481
1	GO:0051493	regulation of cytoskeleton organization	8.21538	8	0.156863	0.0197481	0.0586228
1	GO:0016032	viral reproduction	8.26119	8	0.156863	0.0197481	0.0586228
1	GO:0002700	regulation of production of molecular mediator of immune response	9.63042	4	0.0784314	0.0202859	0.0598703
1	GO:0010952	positive regulation of peptidase activity	9.75595	4	0.0784314	0.0202859	0.0598703
1	GO:0035272	exocrine system development	9.51494	4	0.0784314	0.0202859	0.0598703
1	GO:0001570	vasculogenesis	10.0455	4	0.0784314	0.0202859	0.0598703
1	GO:0031294	lymphocyte costimulation	10.0455	4	0.0784314	0.0202859	0.0598703
1	GO:0043280	positive regulation of cysteine-type endopeptidase activity involved in apoptotic process	10.0455	4	0.0784314	0.0202859	0.0598703
1	GO:0031295	T cell costimulation	10.0455	4	0.0784314	0.0202859	0.0598703
1	GO:2001056	positive regulation of cysteine-type endopeptidase activity	9.75595	4	0.0784314	0.0202859	0.0598703
1	GO:0010950	positive regulation of endopeptidase activity	9.75595	4	0.0784314	0.0202859	0.0598703
1	GO:0002718	regulation of cytokine production involved in immune response	9.89345	4	0.0784314	0.0202859	0.0598703
1	GO:0050673	epithelial cell proliferation	9.89345	4	0.0784314	0.0202859	0.0598703
1	GO:0002040	sprouting angiogenesis	10.0455	4	0.0784314	0.0202859	0.0598703
1	GO:0001959	regulation of cytokine-mediated signaling pathway	8.63042	6	0.117647	0.0204985	0.060428
1	GO:0010629	negative regulation of gene expression	7.00593	3	0.0588235	0.0207673	0.0610084
1	GO:0051130	positive regulation of cellular component organization	6.77244	14	0.27451	0.0208254	0.0611086
1	GO:0030182	neuron differentiation	6.43402	14	0.27451	0.0208254	0.0611086
1	GO:0048017	inositol lipid-mediated signaling	7.72353	11	0.215686	0.0208755	0.0611851
1	GO:0048015	phosphatidylinositol-mediated signaling	7.72353	11	0.215686	0.0208755	0.0611851
1	GO:0043434	response to peptide hormone stimulus	7.60067	11	0.215686	0.0208755	0.0611851
1	GO:0009890	negative regulation of biosynthetic process	6.57153	4	0.0784314	0.023561	0.0678846
1	GO:0016568	chromatin modification	6.67622	2	0.0392157	0.0243701	0.0696641
1	GO:0050863	regulation of T cell activation	7.69182	8	0.156863	0.0244979	0.0699509
1	GO:0048812	neuron projection morphogenesis	7.14929	11	0.215686	0.0246413	0.0701246
1	GO:0032990	cell part morphogenesis	7.12792	11	0.215686	0.0246413	0.0701246
1	GO:0048858	cell projection morphogenesis	7.12792	11	0.215686	0.0246413	0.0701246
1	GO:0048469	cell maturation	9.40803	5	0.0980392	0.0256183	0.0722589
1	GO:0010863	positive regulation of phospholipase C activity	8.63042	7	0.137255	0.0262371	0.0735967
1	GO:0031327	negative regulation of cellular biosynthetic process	6.63042	4	0.0784314	0.0262711	0.0736112
1	GO:0060759	regulation of response to cytokine stimulus	8.57153	6	0.117647	0.0269526	0.0750254
1	GO:0045597	positive regulation of cell differentiation	6.61547	13	0.254902	0.0283182	0.0777225
1	GO:0051253	negative regulation of RNA metabolic process	7.04546	3	0.0588235	0.0292483	0.0791662
1	GO:0045892	negative regulation of transcription, DNA-dependent	7.10686	3	0.0588235	0.0292483	0.0791662
1	GO:0046631	alpha-beta T cell activation	9.89345	4	0.0784314	0.030544	0.0821494
1	GO:0051604	protein maturation	9.89345	4	0.0784314	0.030544	0.0821494
1	GO:0050707	regulation of cytokine secretion	9.51494	4	0.0784314	0.030544	0.0821494
1	GO:0016485	protein processing	9.89345	4	0.0784314	0.030544	0.0821494
1	GO:0046632	alpha-beta T cell differentiation	9.89345	4	0.0784314	0.030544	0.0821494
1	GO:0048593	camera-type eye morphogenesis	9.04546	4	0.0784314	0.030544	0.0821494
1	GO:0022402	cell cycle process	6.9116	2	0.0392157	0.0309996	0.0830241
1	GO:0072012	glomerulus vasculature development	10.408	3	0.0588235	0.0321657	0.0855179
1	GO:0051893	regulation of focal adhesion assembly	10.6304	3	0.0588235	0.0321657	0.0855179
1	GO:0042471	ear morphogenesis	10.0455	3	0.0588235	0.0321657	0.0855179
1	GO:0060333	interferon-gamma-mediated signaling pathway	10.6304	3	0.0588235	0.0321657	0.0855179
1	GO:0007229	integrin-mediated signaling pathway	10.6304	3	0.0588235	0.0321657	0.0855179
1	GO:0090109	regulation of cell-substrate junction assembly	10.6304	3	0.0588235	0.0321657	0.0855179
1	GO:0042472	inner ear morphogenesis	10.408	3	0.0588235	0.0321657	0.0855179
1	GO:0003008	system process	5.61547	8	0.156863	0.0322963	0.0856862
1	GO:0007173	epidermal growth factor receptor signaling pathway	8.04546	9	0.176471	0.0322646	0.0856914
1	GO:0046649	lymphocyte activation	7.19301	10	0.196078	0.033383	0.0879282
1	GO:0060255	regulation of macromolecule metabolic process	3.58057	35	0.686275	0.0340326	0.0887218
1	GO:0061138	morphogenesis of a branching epithelium	7.96745	6	0.117647	0.0346435	0.0897629
1	GO:0010810	regulation of cell-substrate adhesion	9.30849	5	0.0980392	0.03463	0.0898194
1	GO:0001655	urogenital system development	7.00593	8	0.156863	0.0363343	0.0932897
1	GO:0048598	embryonic morphogenesis	6.75595	8	0.156863	0.0363343	0.0932897
1	GO:0002252	immune effector process	7.89345	8	0.156863	0.0363343	0.0932897
1	GO:0032774	RNA biosynthetic process	6.85783	5	0.0980392	0.0382354	0.096901
1	GO:0006351	transcription, DNA-dependent	6.85783	5	0.0980392	0.0382354	0.096901
1	GO:0006996	organelle organization	5.32056	8	0.156863	0.0388967	0.0977984
1	GO:0016192	vesicle-mediated transport	7.40803	10	0.196078	0.0390565	0.0980067
1	GO:0016569	covalent chromatin modification	7.10686	2	0.0392157	0.0392535	0.0981146
1	GO:0048661	positive regulation of smooth muscle cell proliferation	9.75595	4	0.0784314	0.0433763	0.105823
1	GO:0010811	positive regulation of cell-substrate adhesion	9.75595	4	0.0784314	0.0433763	0.105823
1	GO:0002275	myeloid cell activation involved in immune response	9.63042	4	0.0784314	0.0433763	0.105823
1	GO:0045621	positive regulation of lymphocyte differentiation	9.30849	4	0.0784314	0.0433763	0.105823
1	GO:0010595	positive regulation of endothelial cell migration	9.75595	4	0.0784314	0.0433763	0.105823
1	GO:0001952	regulation of cell-matrix adhesion	9.75595	4	0.0784314	0.0433763	0.105823
1	GO:0008543	fibroblast growth factor receptor signaling pathway	8.00593	8	0.156863	0.0435202	0.106073
1	GO:0009790	embryo development	5.95799	12	0.235294	0.0437069	0.106223
1	GO:0021700	developmental maturation	8.75595	6	0.117647	0.0436441	0.106273
1	GO:0001763	morphogenesis of a branching structure	7.75595	6	0.117647	0.0436441	0.106273
1	GO:0032879	regulation of localization	4.78493	24	0.470588	0.043686	0.106273
1	GO:0016570	histone modification	7.14929	2	0.0392157	0.0440938	0.107061
1	GO:0042981	regulation of apoptotic process	5.82306	22	0.431373	0.0446239	0.107936
1	GO:0045321	leukocyte activation	6.85783	11	0.215686	0.0448495	0.107969
1	GO:0044087	regulation of cellular component biogenesis	7.57153	9	0.176471	0.0450511	0.10825
1	GO:0030099	myeloid cell differentiation	8.75595	5	0.0980392	0.0454032	0.108584
1	GO:0001816	cytokine production	8.82306	5	0.0980392	0.0454032	0.108584
1	GO:0002250	adaptive immune response	9.21538	5	0.0980392	0.0454032	0.108584
1	GO:0031346	positive regulation of cell projection organization	9.12792	5	0.0980392	0.0454032	0.108584
1	GO:0060996	dendritic spine development	11.6304	2	0.0392157	0.0466354	0.110699
1	GO:0007405	neuroblast proliferation	11.6304	2	0.0392157	0.0466354	0.110699
1	GO:0072215	regulation of metanephros development	11.2154	2	0.0392157	0.0466354	0.110699
1	GO:0048169	regulation of long-term neuronal synaptic plasticity	11.6304	2	0.0392157	0.0466354	0.110699
1	GO:0036075	replacement ossification	11.6304	2	0.0392157	0.0466354	0.110699
1	GO:0060384	innervation	11.6304	2	0.0392157	0.0466354	0.110699
1	GO:0060638	mesenchymal-epithelial cell signaling	11.6304	2	0.0392157	0.0466354	0.110699
1	GO:0090003	regulation of establishment of protein localization in plasma membrane	11.6304	2	0.0392157	0.0466354	0.110699
1	GO:0007605	sensory perception of sound	11.6304	2	0.0392157	0.0466354	0.110699
1	GO:2000278	regulation of DNA biosynthetic process	11.6304	2	0.0392157	0.0466354	0.110699
1	GO:0032633	interleukin-4 production	11.6304	2	0.0392157	0.0466354	0.110699
1	GO:0097061	dendritic spine organization	11.6304	2	0.0392157	0.0466354	0.110699
1	GO:0031017	exocrine pancreas development	11.6304	2	0.0392157	0.0466354	0.110699
1	GO:0002719	negative regulation of cytokine production involved in immune response	11.6304	2	0.0392157	0.0466354	0.110699
1	GO:2000668	regulation of dendritic cell apoptosis	11.6304	2	0.0392157	0.0466354	0.110699
1	GO:0060337	type I interferon-mediated signaling pathway	11.6304	2	0.0392157	0.0466354	0.110699
1	GO:0048170	positive regulation of long-term neuronal synaptic plasticity	11.6304	2	0.0392157	0.0466354	0.110699
1	GO:0048168	regulation of neuronal synaptic plasticity	11.6304	2	0.0392157	0.0466354	0.110699
1	GO:0001958	endochondral ossification	11.6304	2	0.0392157	0.0466354	0.110699
1	GO:0030325	adrenal gland development	11.6304	2	0.0392157	0.0466354	0.110699
1	GO:0046643	regulation of gamma-delta T cell activation	11.6304	2	0.0392157	0.0466354	0.110699
1	GO:0061298	retina vasculature development in camera-type eye	11.6304	2	0.0392157	0.0466354	0.110699
1	GO:0050690	regulation of defense response to virus by virus	11.6304	2	0.0392157	0.0466354	0.110699
1	GO:0021846	cell proliferation in forebrain	11.6304	2	0.0392157	0.0466354	0.110699
1	GO:0071357	cellular response to type I interferon	11.6304	2	0.0392157	0.0466354	0.110699
1	GO:0060445	branching involved in salivary gland morphogenesis	11.6304	2	0.0392157	0.0466354	0.110699
1	GO:0002701	negative regulation of production of molecular mediator of immune response	11.6304	2	0.0392157	0.0466354	0.110699
1	GO:0060997	dendritic spine morphogenesis	11.6304	2	0.0392157	0.0466354	0.110699
1	GO:2000251	positive regulation of actin cytoskeleton reorganization	11.6304	2	0.0392157	0.0466354	0.110699
1	GO:0046645	positive regulation of gamma-delta T cell activation	11.6304	2	0.0392157	0.0466354	0.110699
1	GO:0033630	positive regulation of cell adhesion mediated by integrin	11.6304	2	0.0392157	0.0466354	0.110699
1	GO:0090080	positive regulation of MAPKKK cascade by fibroblast growth factor receptor signaling pathway	11.6304	2	0.0392157	0.0466354	0.110699
1	GO:0002902	regulation of B cell apoptosis	11.6304	2	0.0392157	0.0466354	0.110699
1	GO:0030901	midbrain development	11.6304	2	0.0392157	0.0466354	0.110699
1	GO:0034340	response to type I interferon	11.6304	2	0.0392157	0.0466354	0.110699
1	GO:0021545	cranial nerve development	11.6304	2	0.0392157	0.0466354	0.110699
1	GO:0009893	positive regulation of metabolic process	4.51494	31	0.607843	0.0481462	0.113126
1	GO:0031344	regulation of cell projection organization	8.00593	7	0.137255	0.0488949	0.114253
1	GO:0010324	membrane invagination	8.46049	7	0.137255	0.0488949	0.114253
1	GO:0006897	endocytosis	8.46049	7	0.137255	0.0488949	0.114253
1	GO:0001501	skeletal system development	7.78912	7	0.137255	0.0488949	0.114253
1	GO:0010558	negative regulation of macromolecule biosynthetic process	6.84034	4	0.0784314	0.0492344	0.114521
2	GO:0006796	phosphate-containing compound metabolic process	4.71554	81	0.84375	1.70807e-12	8.70091e-10
2	GO:0006793	phosphorus metabolic process	4.71156	81	0.84375	2.53577e-12	1.07644e-09
2	GO:0018105	peptidyl-serine phosphorylation	8.63042	18	0.1875	2.24009e-09	4.07536e-07
2	GO:0016310	phosphorylation	4.836	71	0.739583	2.62609e-09	4.45911e-07
2	GO:0045087	innate immune response	6.70759	43	0.447917	1.25969e-08	1.68865e-06
2	GO:0018209	peptidyl-serine modification	8.51494	18	0.1875	3.61816e-08	4.00671e-06
2	GO:0002764	immune response-regulating signaling pathway	5.2496	37	0.385417	4.11539e-08	4.36746e-06
2	GO:0006468	protein phosphorylation	5.09644	66	0.6875	9.44774e-08	7.29193e-06
2	GO:0002757	immune response-activating signal transduction	5.3952	30	0.3125	1.34321e-07	9.24635e-06
2	GO:0002253	activation of immune response	5.3952	30	0.3125	1.34321e-07	9.24635e-06
2	GO:0048011	nerve growth factor receptor signaling pathway	7.72353	26	0.270833	4.23833e-07	2.34675e-05
2	GO:0051246	regulation of protein metabolic process	4.48746	57	0.59375	1.28311e-06	5.44679e-05
2	GO:0007173	epidermal growth factor receptor signaling pathway	8.04546	22	0.229167	1.0925e-06	5.4561e-05
2	GO:0006952	defense response	5.92076	45	0.46875	1.42272e-06	5.84462e-05
2	GO:0006955	immune response	6.09644	44	0.458333	1.64916e-06	6.17708e-05
2	GO:0050778	positive regulation of immune response	5.31451	30	0.3125	1.97177e-06	6.97513e-05
2	GO:0044267	cellular protein metabolic process	4.55005	77	0.802083	1.94987e-06	6.99482e-05
2	GO:0008543	fibroblast growth factor receptor signaling pathway	8.00593	20	0.208333	2.28577e-06	7.86736e-05
2	GO:0051301	cell division	8.3574	18	0.1875	4.55994e-06	0.000131979
2	GO:0071774	response to fibroblast growth factor stimulus	7.96745	20	0.208333	4.63431e-06	0.000132624
2	GO:0044344	cellular response to fibroblast growth factor stimulus	7.96745	20	0.208333	4.63431e-06	0.000132624
2	GO:0002684	positive regulation of immune system process	4.91617	34	0.354167	4.55245e-06	0.000133277
2	GO:0002221	pattern recognition receptor signaling pathway	5.67622	19	0.197917	6.6969e-06	0.000174051
2	GO:0002224	toll-like receptor signaling pathway	5.75595	19	0.197917	6.6969e-06	0.000174051
2	GO:0034641	cellular nitrogen compound metabolic process	4.67622	17	0.177083	8.59055e-06	0.000195358
2	GO:0071363	cellular response to growth factor stimulus	6.92998	31	0.322917	1.18728e-05	0.000252001
2	GO:0046483	heterocycle metabolic process	5.62292	16	0.166667	1.17287e-05	0.000253161
2	GO:0007169	transmembrane receptor protein tyrosine kinase signaling pathway	5.71554	39	0.40625	1.30105e-05	0.000271622
2	GO:0002758	innate immune response-activating signal transduction	5.66079	19	0.197917	1.3144e-05	0.000272176
2	GO:0002218	activation of innate immune response	5.66079	19	0.197917	1.3144e-05	0.000272176
2	GO:0006139	nucleobase-containing compound metabolic process	4.75595	16	0.166667	1.50893e-05	0.000295634
2	GO:0019538	protein metabolic process	4.45716	78	0.8125	1.70375e-05	0.000319078
2	GO:0032268	regulation of cellular protein metabolic process	4.79753	52	0.541667	1.73134e-05	0.000321877
2	GO:0050776	regulation of immune response	4.92998	39	0.40625	1.82731e-05	0.000332441
2	GO:0008286	insulin receptor signaling pathway	8.57153	16	0.166667	1.89054e-05	0.000339099
2	GO:0032869	cellular response to insulin stimulus	8.30849	18	0.1875	1.90711e-05	0.000339679
2	GO:0046834	lipid phosphorylation	9.89345	9	0.09375	2.05661e-05	0.000356339
2	GO:0046854	phosphatidylinositol phosphorylation	9.89345	9	0.09375	2.05661e-05	0.000356339
2	GO:0046474	glycerophospholipid biosynthetic process	9.89345	9	0.09375	2.05661e-05	0.000356339
2	GO:0006725	cellular aromatic compound metabolic process	5.94859	17	0.177083	2.34111e-05	0.00039229
2	GO:0045089	positive regulation of innate immune response	5.65314	19	0.197917	2.46928e-05	0.000403157
2	GO:0070848	response to growth factor stimulus	6.89345	31	0.322917	2.6466e-05	0.000418689
2	GO:0006950	response to stress	4.33274	66	0.6875	2.70867e-05	0.000425863
2	GO:0032868	response to insulin stimulus	8.12792	19	0.197917	4.45892e-05	0.00059773
2	GO:0048583	regulation of response to stimulus	3.30849	69	0.71875	4.73504e-05	0.000615314
2	GO:0006464	protein modification process	4.61547	73	0.760417	6.80148e-05	0.000821013
2	GO:0002768	immune response-regulating cell surface receptor signaling pathway	7.2381	26	0.270833	6.94424e-05	0.000834291
2	GO:0032879	regulation of localization	4.78493	50	0.520833	7.58133e-05	0.000869804
2	GO:0034142	toll-like receptor 4 signaling pathway	8.46049	16	0.166667	7.61978e-05	0.000870295
2	GO:0018107	peptidyl-threonine phosphorylation	10.0455	8	0.0833333	8.00027e-05	0.000897651
2	GO:0006661	phosphatidylinositol biosynthetic process	10.0455	8	0.0833333	8.00027e-05	0.000897651
2	GO:0036092	phosphatidylinositol-3-phosphate biosynthetic process	10.0455	8	0.0833333	8.00027e-05	0.000897651
2	GO:0018210	peptidyl-threonine modification	10.0455	8	0.0833333	8.00027e-05	0.000897651
2	GO:0030258	lipid modification	9.51494	10	0.104167	8.49077e-05	0.000944366
2	GO:0006650	glycerophospholipid metabolic process	8.63042	10	0.104167	8.49077e-05	0.000944366
2	GO:0008654	phospholipid biosynthetic process	9.75595	9	0.09375	8.97515e-05	0.000989598
2	GO:0045017	glycerolipid biosynthetic process	9.75595	9	0.09375	8.97515e-05	0.000989598
2	GO:0032386	regulation of intracellular transport	7.75595	21	0.21875	9.54859e-05	0.00104379
2	GO:0043412	macromolecule modification	4.60067	73	0.760417	0.000107317	0.00110663
2	GO:0002755	MyD88-dependent toll-like receptor signaling pathway	8.57153	15	0.15625	0.000109271	0.00111325
2	GO:0019438	aromatic compound biosynthetic process	6.75595	9	0.09375	0.000125371	0.00124734
2	GO:0018130	heterocycle biosynthetic process	6.52888	9	0.09375	0.000125371	0.00124734
2	GO:0090304	nucleic acid metabolic process	5.55717	15	0.15625	0.0001351	0.00131839
2	GO:0051247	positive regulation of protein metabolic process	5.85783	42	0.4375	0.000134976	0.0013325
2	GO:0034134	toll-like receptor 2 signaling pathway	8.69182	14	0.145833	0.000155336	0.00148737
2	GO:0045088	regulation of innate immune response	5.52888	22	0.229167	0.000157828	0.00149438
2	GO:0034654	nucleobase-containing compound biosynthetic process	6.51494	9	0.09375	0.000159223	0.001502
2	GO:0061024	membrane organization	7.21538	23	0.239583	0.000160328	0.00150684
2	GO:0007167	enzyme linked receptor protein signaling pathway	5.48067	40	0.416667	0.000181329	0.00164358
2	GO:0060255	regulation of macromolecule metabolic process	3.58057	69	0.71875	0.000185445	0.00165729
2	GO:0006807	nitrogen compound metabolic process	4.61547	22	0.229167	0.000188313	0.0016712
2	GO:0051049	regulation of transport	5.54296	39	0.40625	0.000208745	0.00181458
2	GO:0002756	MyD88-independent toll-like receptor signaling pathway	8.82306	13	0.135417	0.00021863	0.00188125
2	GO:0034162	toll-like receptor 9 signaling pathway	8.82306	13	0.135417	0.00021863	0.00188125
2	GO:0006644	phospholipid metabolic process	8.57153	10	0.104167	0.000235694	0.0019944
2	GO:0030168	platelet activation	8.3574	16	0.166667	0.000250156	0.00209588
2	GO:0044271	cellular nitrogen compound biosynthetic process	6.43402	10	0.104167	0.000269014	0.00222461
2	GO:0007067	mitosis	9.21538	9	0.09375	0.00028489	0.00232569
2	GO:0000087	M phase of mitotic cell cycle	9.21538	9	0.09375	0.00028489	0.00232569
2	GO:0046488	phosphatidylinositol metabolic process	8.82306	9	0.09375	0.00028489	0.00232569
2	GO:0031399	regulation of protein modification process	4.93461	45	0.46875	0.00030504	0.00243554
2	GO:0050994	regulation of lipid catabolic process	10.0455	7	0.0729167	0.000304986	0.00244277
2	GO:0019318	hexose metabolic process	10.2154	7	0.0729167	0.000304986	0.00244277
2	GO:0006006	glucose metabolic process	10.2154	7	0.0729167	0.000304986	0.00244277
2	GO:0006470	protein dephosphorylation	9.89345	8	0.0833333	0.000317749	0.00251337
2	GO:0071375	cellular response to peptide hormone stimulus	7.92998	19	0.197917	0.000340636	0.00262115
2	GO:0007243	intracellular protein kinase cascade	6.32056	29	0.302083	0.00035958	0.0027503
2	GO:0006935	chemotaxis	7.10686	22	0.229167	0.000361482	0.00275657
2	GO:0042330	taxis	7.10686	22	0.229167	0.000361482	0.00275657
2	GO:0051726	regulation of cell cycle	6.14929	32	0.333333	0.000368581	0.00279398
2	GO:0071407	cellular response to organic cyclic compound	7.82306	2	0.0208333	0.000416008	0.00308913
2	GO:0032270	positive regulation of cellular protein metabolic process	6.09644	39	0.40625	0.000462865	0.00335874
2	GO:0031349	positive regulation of defense response	5.48746	21	0.21875	0.000539248	0.00384724
2	GO:0032535	regulation of cellular component size	9.12792	10	0.104167	0.000560813	0.00394583
2	GO:0001932	regulation of protein phosphorylation	5.12792	41	0.427083	0.000570685	0.00400423
2	GO:0034138	toll-like receptor 3 signaling pathway	8.89345	12	0.125	0.000602754	0.00419458
2	GO:0035666	TRIF-dependent toll-like receptor signaling pathway	8.89345	12	0.125	0.000602754	0.00419458
2	GO:0030030	cell projection organization	6.92998	24	0.25	0.000704432	0.00475912
2	GO:0035556	intracellular signal transduction	5.06563	57	0.59375	0.000742831	0.00497892
2	GO:0010558	negative regulation of macromolecule biosynthetic process	6.84034	6	0.0625	0.00076213	0.00506827
2	GO:0032990	cell part morphogenesis	7.12792	21	0.21875	0.000789583	0.00516984
2	GO:0048812	neuron projection morphogenesis	7.14929	21	0.21875	0.000789583	0.00516984
2	GO:0048858	cell projection morphogenesis	7.12792	21	0.21875	0.000789583	0.00516984
2	GO:0016311	dephosphorylation	9.75595	8	0.0833333	0.000925742	0.00586534
2	GO:2000113	negative regulation of cellular macromolecule biosynthetic process	6.94859	6	0.0625	0.000961483	0.0060022
2	GO:0048584	positive regulation of response to stimulus	4.19579	51	0.53125	0.00102174	0.00631645
2	GO:0007411	axon guidance	8.12792	15	0.15625	0.00102738	0.0063359
2	GO:0002682	regulation of immune system process	4.36676	46	0.479167	0.00103124	0.00634436
2	GO:0031175	neuron projection development	7.06563	22	0.229167	0.00109227	0.00660811
2	GO:0046209	nitric oxide metabolic process	10.408	6	0.0625	0.00113617	0.00679305
2	GO:0033554	cellular response to stress	5.69182	34	0.354167	0.00115071	0.00684779
2	GO:0034762	regulation of transmembrane transport	7.78912	17	0.177083	0.00115767	0.00687314
2	GO:0046486	glycerolipid metabolic process	8.46049	10	0.104167	0.00118621	0.00702622
2	GO:0006915	apoptotic process	6.32056	31	0.322917	0.00126094	0.00738301
2	GO:0031401	positive regulation of protein modification process	6.26119	35	0.364583	0.00130204	0.0076062
2	GO:0018108	peptidyl-tyrosine phosphorylation	7.06563	7	0.0729167	0.00134403	0.0076927
2	GO:0018212	peptidyl-tyrosine modification	7.06563	7	0.0729167	0.00134403	0.0076927
2	GO:0002376	immune system process	4.05551	47	0.489583	0.00133896	0.00769824
2	GO:0010608	posttranscriptional regulation of gene expression	8.51494	13	0.135417	0.00133649	0.00770145
2	GO:0065009	regulation of molecular function	4.60805	56	0.583333	0.00134982	0.00770848
2	GO:0009581	detection of external stimulus	8.69182	11	0.114583	0.00160057	0.00880488
2	GO:0034146	toll-like receptor 5 signaling pathway	8.96745	11	0.114583	0.00160057	0.00880488
2	GO:0034166	toll-like receptor 10 signaling pathway	8.96745	11	0.114583	0.00160057	0.00880488
2	GO:0042035	regulation of cytokine biosynthetic process	8.63042	9	0.09375	0.00163333	0.00896572
2	GO:0000280	nuclear division	9.04546	9	0.09375	0.00163333	0.00896572
2	GO:0048285	organelle fission	9.04546	9	0.09375	0.00163333	0.00896572
2	GO:0043434	response to peptide hormone stimulus	7.60067	20	0.208333	0.00166905	0.00912248
2	GO:0045934	negative regulation of nucleobase-containing compound metabolic process	6.84034	7	0.0729167	0.00167589	0.00914023
2	GO:0007409	axonogenesis	7.38249	19	0.197917	0.00171651	0.00928228
2	GO:0009890	negative regulation of biosynthetic process	6.57153	8	0.0833333	0.0017912	0.00958444
2	GO:0060341	regulation of cellular localization	6.43402	30	0.3125	0.00182694	0.00971442
2	GO:0032774	RNA biosynthetic process	6.85783	9	0.09375	0.00186649	0.00986297
2	GO:0006351	transcription, DNA-dependent	6.85783	9	0.09375	0.00186649	0.00986297
2	GO:0071900	regulation of protein serine/threonine kinase activity	6.98656	27	0.28125	0.0018985	0.00994953
2	GO:0042325	regulation of phosphorylation	4.94392	43	0.447917	0.00204074	0.0105006
2	GO:0007584	response to nutrient	8.04546	2	0.0208333	0.00204569	0.0105048
2	GO:0012501	programmed cell death	6.28464	31	0.322917	0.00210603	0.0107712
2	GO:0031327	negative regulation of cellular biosynthetic process	6.63042	8	0.0833333	0.00221542	0.0112404
2	GO:0008219	cell death	6.11735	34	0.354167	0.00237661	0.0118227
2	GO:0051253	negative regulation of RNA metabolic process	7.04546	6	0.0625	0.00237295	0.0118276
2	GO:0045892	negative regulation of transcription, DNA-dependent	7.10686	6	0.0625	0.00237295	0.0118276
2	GO:0045859	regulation of protein kinase activity	6.18196	32	0.333333	0.00239404	0.0118862
2	GO:0022403	cell cycle phase	7.57153	15	0.15625	0.00250239	0.0123519
2	GO:0002252	immune effector process	7.89345	15	0.15625	0.00250239	0.0123519
2	GO:0071396	cellular response to lipid	7.43402	5	0.0520833	0.00262896	0.0129017
2	GO:0001934	positive regulation of protein phosphorylation	6.64553	31	0.322917	0.00268953	0.0131231
2	GO:0010604	positive regulation of macromolecule metabolic process	4.93461	53	0.552083	0.00281992	0.0136287
2	GO:0030522	intracellular receptor mediated signaling pathway	7.69182	3	0.03125	0.00284383	0.0136923
2	GO:0010256	endomembrane system organization	9.89345	7	0.0729167	0.00290001	0.013858
2	GO:0046627	negative regulation of insulin receptor signaling pathway	9.89345	7	0.0729167	0.00290001	0.013858
2	GO:0042990	regulation of transcription factor import into nucleus	9.89345	7	0.0729167	0.00290001	0.013858
2	GO:0016572	histone phosphorylation	9.51494	7	0.0729167	0.00290001	0.013858
2	GO:0016265	death	6.10686	34	0.354167	0.00298554	0.0141341
2	GO:0006325	chromatin organization	6.27287	7	0.0729167	0.00319695	0.0149681
2	GO:0000279	M phase	8.69182	9	0.09375	0.00324211	0.0150413
2	GO:0007186	G-protein coupled receptor signaling pathway	6.84034	8	0.0833333	0.0033614	0.0154261
2	GO:0048667	cell morphogenesis involved in neuron differentiation	7.21538	19	0.197917	0.00341022	0.0155104
2	GO:0010243	response to organic nitrogen	6.73965	31	0.322917	0.00340858	0.0155307
2	GO:0033157	regulation of intracellular protein transport	8.40803	13	0.135417	0.003498	0.015853
2	GO:0000122	negative regulation of transcription from RNA polymerase II promoter	7.66079	4	0.0416667	0.00353981	0.0159573
2	GO:0006259	DNA metabolic process	6.52888	4	0.0416667	0.00353981	0.0159573
2	GO:0009611	response to wounding	6.36989	36	0.375	0.00358023	0.0160543
2	GO:0045931	positive regulation of mitotic cell cycle	10.2154	6	0.0625	0.00362974	0.0161908
2	GO:0046324	regulation of glucose import	10.2154	6	0.0625	0.00362974	0.0161908
2	GO:0032465	regulation of cytokinesis	10.2154	6	0.0625	0.00362974	0.0161908
2	GO:0042345	regulation of NF-kappaB import into nucleus	10.2154	6	0.0625	0.00362974	0.0161908
2	GO:0002429	immune response-activating cell surface receptor signaling pathway	7.92998	15	0.15625	0.00373336	0.016566
2	GO:0051051	negative regulation of transport	7.60067	16	0.166667	0.00372869	0.0165741
2	GO:0051649	establishment of localization in cell	6.57153	22	0.229167	0.00384035	0.0168936
2	GO:0048666	neuron development	6.75595	22	0.229167	0.00384035	0.0168936
2	GO:0009966	regulation of signal transduction	4.22103	55	0.572917	0.00408772	0.0177065
2	GO:0051172	negative regulation of nitrogen compound metabolic process	6.80599	8	0.0833333	0.00412333	0.0178002
2	GO:0032411	positive regulation of transporter activity	10.6304	5	0.0520833	0.00411906	0.017812
2	GO:0005977	glycogen metabolic process	10.6304	5	0.0520833	0.00411906	0.017812
2	GO:0006942	regulation of striated muscle contraction	10.6304	5	0.0520833	0.00411906	0.017812
2	GO:0022400	regulation of rhodopsin mediated signaling pathway	10.6304	5	0.0520833	0.00411906	0.017812
2	GO:0044264	cellular polysaccharide metabolic process	10.6304	5	0.0520833	0.00411906	0.017812
2	GO:0006073	cellular glucan metabolic process	10.6304	5	0.0520833	0.00411906	0.017812
2	GO:0030832	regulation of actin filament length	10.6304	5	0.0520833	0.00411906	0.017812
2	GO:0008064	regulation of actin polymerization or depolymerization	10.6304	5	0.0520833	0.00411906	0.017812
2	GO:0030833	regulation of actin filament polymerization	10.6304	5	0.0520833	0.00411906	0.017812
2	GO:0032648	regulation of interferon-beta production	10.0455	5	0.0520833	0.00411906	0.017812
2	GO:0044042	glucan metabolic process	10.6304	5	0.0520833	0.00411906	0.017812
2	GO:0032271	regulation of protein polymerization	10.6304	5	0.0520833	0.00411906	0.017812
2	GO:0055117	regulation of cardiac muscle contraction	10.6304	5	0.0520833	0.00411906	0.017812
2	GO:0022402	cell cycle process	6.9116	20	0.208333	0.00441141	0.0189475
2	GO:0032409	regulation of transporter activity	9.04546	8	0.0833333	0.0045636	0.0195025
2	GO:0006417	regulation of translation	9.40803	8	0.0833333	0.0045636	0.0195025
2	GO:0051641	cellular localization	6.12792	26	0.270833	0.0045946	0.0195693
2	GO:0006810	transport	5.32056	33	0.34375	0.00522792	0.0215461
2	GO:0031347	regulation of defense response	5.19857	27	0.28125	0.00529429	0.0217493
2	GO:0051403	stress-activated MAPK cascade	8.46049	13	0.135417	0.00534601	0.0218911
2	GO:0031098	stress-activated protein kinase signaling cascade	7.66079	13	0.135417	0.00534601	0.0218911
2	GO:0071417	cellular response to organic nitrogen	7.51494	21	0.21875	0.00549744	0.0224032
2	GO:0051234	establishment of localization	5.20976	34	0.354167	0.00569412	0.0228753
2	GO:0045937	positive regulation of phosphate metabolic process	6.29652	37	0.385417	0.00579945	0.0231887
2	GO:0010562	positive regulation of phosphorus metabolic process	6.29652	37	0.385417	0.00579945	0.0231887
2	GO:0002274	myeloid leukocyte activation	9.12792	9	0.09375	0.00588541	0.0234587
2	GO:0019220	regulation of phosphate metabolic process	4.80599	46	0.479167	0.006035	0.0239799
2	GO:0051174	regulation of phosphorus metabolic process	4.80599	46	0.479167	0.006035	0.0239799
2	GO:0030307	positive regulation of cell growth	9.75595	7	0.0729167	0.00635499	0.0250172
2	GO:0010827	regulation of glucose transport	9.75595	7	0.0729167	0.00635499	0.0250172
2	GO:0046626	regulation of insulin receptor signaling pathway	9.75595	7	0.0729167	0.00635499	0.0250172
2	GO:0010627	regulation of intracellular protein kinase cascade	5.40803	36	0.375	0.00660258	0.0257926
2	GO:0040011	locomotion	6.07583	29	0.302083	0.00673305	0.0261419
2	GO:0016044	cellular membrane organization	7.33274	18	0.1875	0.00672616	0.026155
2	GO:0016192	vesicle-mediated transport	7.40803	18	0.1875	0.00672616	0.026155
2	GO:0080134	regulation of response to stress	4.70363	37	0.385417	0.00703922	0.0271239
2	GO:0048598	embryonic morphogenesis	6.75595	2	0.0208333	0.00723455	0.0276673
2	GO:0065003	macromolecular complex assembly	6.33274	7	0.0729167	0.00727385	0.0277343
2	GO:0043549	regulation of kinase activity	6.00593	32	0.333333	0.00726793	0.0277532
2	GO:0040008	regulation of growth	7.43402	20	0.208333	0.00781869	0.0292856
2	GO:0009887	organ morphogenesis	5.85783	5	0.0520833	0.00785272	0.0293699
2	GO:0001558	regulation of cell growth	8.30849	13	0.135417	0.00790763	0.0295319
2	GO:0002431	Fc receptor mediated stimulatory signaling pathway	9.40803	8	0.0833333	0.00847063	0.0310427
2	GO:0042116	macrophage activation	10.0455	6	0.0625	0.00870437	0.0318078
2	GO:0022898	regulation of transmembrane transporter activity	9.40803	6	0.0625	0.00870437	0.0318078
2	GO:0009605	response to external stimulus	5.46719	44	0.458333	0.00957033	0.0343803
2	GO:0042327	positive regulation of phosphorylation	6.46049	33	0.34375	0.00959667	0.0344264
2	GO:0006887	exocytosis	8.96745	9	0.09375	0.00993562	0.0354923
2	GO:0032989	cellular component morphogenesis	6.60067	25	0.260417	0.0103347	0.036661
2	GO:0044260	cellular macromolecule metabolic process	3.92998	81	0.84375	0.0104326	0.0369567
2	GO:0002520	immune system development	6.3952	7	0.0729167	0.0107817	0.037773
2	GO:0051276	chromosome organization	5.85783	9	0.09375	0.0109752	0.0382407
2	GO:0046907	intracellular transport	7.33274	14	0.145833	0.0110725	0.0385267
2	GO:0046822	regulation of nucleocytoplasmic transport	8.63042	11	0.114583	0.0113204	0.0391754
2	GO:0051329	interphase of mitotic cell cycle	8.51494	11	0.114583	0.0113204	0.0391754
2	GO:0000902	cell morphogenesis	6.66079	24	0.25	0.0114346	0.03941
2	GO:0007010	cytoskeleton organization	8.26119	12	0.125	0.0114621	0.0394512
2	GO:0032387	negative regulation of intracellular transport	10.408	5	0.0520833	0.0115763	0.0397369
2	GO:0032677	regulation of interleukin-8 production	10.0455	5	0.0520833	0.0115763	0.0397369
2	GO:0010822	positive regulation of mitochondrion organization	10.408	5	0.0520833	0.0115763	0.0397369
2	GO:0016056	rhodopsin mediated signaling pathway	10.408	5	0.0520833	0.0115763	0.0397369
2	GO:0035335	peptidyl-tyrosine dephosphorylation	10.408	5	0.0520833	0.0115763	0.0397369
2	GO:0009595	detection of biotic stimulus	9.75595	5	0.0520833	0.0115763	0.0397369
2	GO:0009593	detection of chemical stimulus	9.40803	7	0.0729167	0.0121615	0.041136
2	GO:0042108	positive regulation of cytokine biosynthetic process	8.75595	7	0.0729167	0.0121615	0.041136
2	GO:0071310	cellular response to organic substance	4.66079	49	0.510417	0.0124687	0.0420631
2	GO:0044092	negative regulation of molecular function	7.00593	23	0.239583	0.0126212	0.0424092
2	GO:0033043	regulation of organelle organization	6.73965	23	0.239583	0.0126212	0.0424092
2	GO:0010564	regulation of cell cycle process	7.02556	17	0.177083	0.012788	0.042688
2	GO:0001775	cell activation	6.3952	25	0.260417	0.0128726	0.042858
2	GO:0051338	regulation of transferase activity	5.93926	32	0.333333	0.0130794	0.0432078
2	GO:0070271	protein complex biogenesis	7.33274	7	0.0729167	0.0130671	0.0432231
2	GO:0006461	protein complex assembly	7.33274	7	0.0729167	0.0130671	0.0432231
2	GO:0033993	response to lipid	6.64553	14	0.145833	0.0130574	0.0432472
2	GO:0006366	transcription from RNA polymerase II promoter	7.85783	4	0.0416667	0.0133897	0.043948
2	GO:0007049	cell cycle	6.38249	26	0.270833	0.0143054	0.0462383
2	GO:0032479	regulation of type I interferon production	8.75595	8	0.0833333	0.0144461	0.046516
2	GO:0010810	regulation of cell-substrate adhesion	9.30849	8	0.0833333	0.0144461	0.046516
2	GO:0045927	positive regulation of growth	9.21538	8	0.0833333	0.0144461	0.046516
2	GO:0010638	positive regulation of organelle organization	7.69182	15	0.15625	0.0144764	0.0465546
2	GO:0032757	positive regulation of interleukin-8 production	10.8935	4	0.0416667	0.0144403	0.0465562
2	GO:0034329	cell junction assembly	10.6304	4	0.0416667	0.0144403	0.0465562
2	GO:0014037	Schwann cell differentiation	10.8935	4	0.0416667	0.0144403	0.0465562
2	GO:0032490	detection of molecule of bacterial origin	10.408	4	0.0416667	0.0144403	0.0465562
2	GO:0035306	positive regulation of dephosphorylation	10.8935	4	0.0416667	0.0144403	0.0465562
2	GO:0090317	negative regulation of intracellular protein transport	10.8935	4	0.0416667	0.0144403	0.0465562
2	GO:0032728	positive regulation of interferon-beta production	10.8935	4	0.0416667	0.0144403	0.0465562
2	GO:0032770	positive regulation of monooxygenase activity	10.8935	4	0.0416667	0.0144403	0.0465562
2	GO:0034502	protein localization to chromosome	10.8935	4	0.0416667	0.0144403	0.0465562
2	GO:0035307	positive regulation of protein dephosphorylation	10.8935	4	0.0416667	0.0144403	0.0465562
2	GO:0051000	positive regulation of nitric-oxide synthase activity	10.8935	4	0.0416667	0.0144403	0.0465562
2	GO:0014044	Schwann cell development	10.8935	4	0.0416667	0.0144403	0.0465562
2	GO:0007252	I-kappaB phosphorylation	10.8935	4	0.0416667	0.0144403	0.0465562
2	GO:0035304	regulation of protein dephosphorylation	10.8935	4	0.0416667	0.0144403	0.0465562
2	GO:0055123	digestive system development	8.00593	2	0.0208333	0.0149511	0.0477796
2	GO:0030155	regulation of cell adhesion	8.00593	14	0.145833	0.0152346	0.0485032
2	GO:0051050	positive regulation of transport	6.82306	21	0.21875	0.0152639	0.0485357
2	GO:0070201	regulation of establishment of protein localization	7.40803	18	0.1875	0.0155065	0.0491232
2	GO:0048534	hemopoietic or lymphoid organ development	6.46049	7	0.0729167	0.015788	0.0497058
2	GO:0030182	neuron differentiation	6.43402	23	0.239583	0.0157694	0.0497088
2	GO:0090316	positive regulation of intracellular protein transport	8.75595	10	0.104167	0.016438	0.0514344
2	GO:0051092	positive regulation of NF-kappaB transcription factor activity	8.63042	11	0.114583	0.0165769	0.051742
2	GO:0051325	interphase	8.46049	11	0.114583	0.0165769	0.051742
2	GO:0051606	detection of stimulus	8.17099	11	0.114583	0.0165769	0.051742
2	GO:0023051	regulation of signaling	4.04295	57	0.59375	0.0170184	0.0527963
2	GO:0010646	regulation of cell communication	4.39201	57	0.59375	0.0170184	0.0527963
2	GO:0008361	regulation of cell size	9.75595	6	0.0625	0.0174109	0.0535574
2	GO:0008016	regulation of heart contraction	9.51494	6	0.0625	0.0174109	0.0535574
2	GO:0000086	G2/M transition of mitotic cell cycle	9.89345	6	0.0625	0.0174109	0.0535574
2	GO:0045913	positive regulation of carbohydrate metabolic process	9.75595	6	0.0625	0.0174109	0.0535574
2	GO:0044093	positive regulation of molecular function	5.14392	42	0.4375	0.0173582	0.0535896
2	GO:0000904	cell morphogenesis involved in differentiation	6.78912	22	0.229167	0.0173981	0.0536475
2	GO:0019932	second-messenger-mediated signaling	8.00593	3	0.03125	0.0181488	0.0550954
2	GO:0071902	positive regulation of protein serine/threonine kinase activity	7.43402	19	0.197917	0.0182701	0.0553318
2	GO:0050790	regulation of catalytic activity	5.09126	45	0.46875	0.0185889	0.056097
2	GO:0009991	response to extracellular stimulus	7.51494	6	0.0625	0.0186549	0.0562296
2	GO:0043933	macromolecular complex subunit organization	6.2381	9	0.09375	0.0187969	0.0564573
2	GO:0001501	skeletal system development	7.78912	2	0.0208333	0.0189317	0.0566617
2	GO:0016070	RNA metabolic process	6.63042	13	0.135417	0.01911	0.0570611
2	GO:0000165	MAPKKK cascade	6.80599	18	0.1875	0.0199046	0.0588815
2	GO:0019637	organophosphate metabolic process	7.3574	14	0.145833	0.0205159	0.0604091
2	GO:0032481	positive regulation of type I interferon production	9.30849	7	0.0729167	0.0210258	0.0615548
2	GO:0071156	regulation of cell cycle arrest	8.96745	7	0.0729167	0.0210258	0.0615548
2	GO:0080090	regulation of primary metabolic process	3.52189	67	0.697917	0.021251	0.0621426
2	GO:0007423	sensory organ development	7.28464	3	0.03125	0.0225692	0.0655459
2	GO:0030097	hemopoiesis	6.64553	7	0.0729167	0.0228296	0.0662266
2	GO:0043170	macromolecule metabolic process	3.84906	81	0.84375	0.0232327	0.0671666
2	GO:0071214	cellular response to abiotic stimulus	8.46049	11	0.114583	0.0234838	0.0677387
2	GO:0007600	sensory perception	8.3574	2	0.0208333	0.0238966	0.0686959
2	GO:0048565	digestive tract development	8.12792	2	0.0208333	0.0238966	0.0686959
2	GO:0008610	lipid biosynthetic process	8.46049	10	0.104167	0.0239302	0.068715
2	GO:0071495	cellular response to endogenous stimulus	5.88446	34	0.354167	0.0246122	0.0701199
2	GO:0023052	signaling	3.04671	82	0.854167	0.0247385	0.0703226
2	GO:0010821	regulation of mitochondrion organization	10.0455	5	0.0520833	0.0248205	0.0703984
2	GO:0043154	negative regulation of cysteine-type endopeptidase activity involved in apoptotic process	10.2154	5	0.0520833	0.0248205	0.0703984
2	GO:0010466	negative regulation of peptidase activity	10.2154	5	0.0520833	0.0248205	0.0703984
2	GO:0016049	cell growth	10.2154	5	0.0520833	0.0248205	0.0703984
2	GO:0032768	regulation of monooxygenase activity	10.2154	5	0.0520833	0.0248205	0.0703984
2	GO:0010951	negative regulation of endopeptidase activity	10.2154	5	0.0520833	0.0248205	0.0703984
2	GO:2000117	negative regulation of cysteine-type endopeptidase activity	10.2154	5	0.0520833	0.0248205	0.0703984
2	GO:0007603	phototransduction, visible light	10.2154	5	0.0520833	0.0248205	0.0703984
2	GO:0010543	regulation of platelet activation	10.2154	5	0.0520833	0.0248205	0.0703984
2	GO:0032412	regulation of ion transmembrane transporter activity	9.63042	5	0.0520833	0.0248205	0.0703984
2	GO:0030216	keratinocyte differentiation	10.0455	5	0.0520833	0.0248205	0.0703984
2	GO:0042326	negative regulation of phosphorylation	7.85783	15	0.15625	0.0252311	0.0713249
2	GO:0010629	negative regulation of gene expression	7.00593	9	0.09375	0.0264943	0.0739113
2	GO:0045860	positive regulation of protein kinase activity	6.57153	22	0.229167	0.0264904	0.0739813
2	GO:0031667	response to nutrient levels	7.57153	6	0.0625	0.0271529	0.0755004
2	GO:0010648	negative regulation of cell communication	6.11735	25	0.260417	0.0285403	0.077996
2	GO:0043405	regulation of MAP kinase activity	7.48746	19	0.197917	0.0287755	0.0784703
2	GO:0032880	regulation of protein localization	7.2381	19	0.197917	0.0287755	0.0784703
2	GO:0019222	regulation of metabolic process	3.14124	70	0.729167	0.0288863	0.0786041
2	GO:0032872	regulation of stress-activated MAPK cascade	8.21538	13	0.135417	0.0289246	0.0786242
2	GO:0042180	cellular ketone metabolic process	8.04546	2	0.0208333	0.0300639	0.0809438
2	GO:0051128	regulation of cellular component organization	5.52888	35	0.364583	0.0300044	0.0809547
2	GO:0006112	energy reserve metabolic process	9.75595	6	0.0625	0.030678	0.082336
2	GO:0042742	defense response to bacterium	9.75595	6	0.0625	0.030678	0.082336
2	GO:0002275	myeloid cell activation involved in immune response	9.63042	6	0.0625	0.030678	0.082336
2	GO:0032675	regulation of interleukin-6 production	9.51494	6	0.0625	0.030678	0.082336
2	GO:0071260	cellular response to mechanical stimulus	9.75595	6	0.0625	0.030678	0.082336
2	GO:0044237	cellular metabolic process	2.91389	87	0.90625	0.0313049	0.0835782
2	GO:0090066	regulation of anatomical structure size	8.30849	11	0.114583	0.0322998	0.0856062
2	GO:0031400	negative regulation of protein modification process	7.78912	15	0.15625	0.0324694	0.085877
2	GO:0007166	cell surface receptor signaling pathway	4.3512	59	0.614583	0.0330228	0.0871596
2	GO:0007017	microtubule-based process	8.96745	7	0.0729167	0.033581	0.0879041
2	GO:0000186	activation of MAPKK activity	9.40803	7	0.0729167	0.033581	0.0879041
2	GO:0000082	G1/S transition of mitotic cell cycle	9.40803	7	0.0729167	0.033581	0.0879041
2	GO:0034765	regulation of ion transmembrane transport	9.04546	7	0.0729167	0.033581	0.0879041
2	GO:0007154	cell communication	3.01448	82	0.854167	0.033454	0.0880241
2	GO:0009059	macromolecule biosynthetic process	6.46049	16	0.166667	0.0338523	0.0884325
2	GO:0042306	regulation of protein import into nucleus	8.82306	9	0.09375	0.0344979	0.0896594
2	GO:0009895	negative regulation of catabolic process	8.96745	8	0.0833333	0.0346256	0.0898994
2	GO:0030111	regulation of Wnt receptor signaling pathway	8.75595	8	0.0833333	0.0346256	0.0898994
2	GO:0071901	negative regulation of protein serine/threonine kinase activity	9.12792	8	0.0833333	0.0346256	0.0898994
2	GO:0007162	negative regulation of cell adhesion	10.6304	4	0.0416667	0.0350827	0.0905326
2	GO:0042346	positive regulation of NF-kappaB import into nucleus	10.6304	4	0.0416667	0.0350827	0.0905326
2	GO:0060491	regulation of cell projection assembly	10.408	4	0.0416667	0.0350827	0.0905326
2	GO:0034110	regulation of homotypic cell-cell adhesion	10.6304	4	0.0416667	0.0350827	0.0905326
2	GO:0002281	macrophage activation involved in immune response	10.6304	4	0.0416667	0.0350827	0.0905326
2	GO:0051248	negative regulation of protein metabolic process	7.21538	19	0.197917	0.0355113	0.0914533
2	GO:0031323	regulation of cellular metabolic process	3.47729	67	0.697917	0.0363517	0.0932404
2	GO:0051179	localization	4.62292	43	0.447917	0.0367905	0.0942711
2	GO:0071822	protein complex subunit organization	7.2381	9	0.09375	0.0368691	0.0943776
2	GO:0001933	negative regulation of protein phosphorylation	8.04546	13	0.135417	0.0378231	0.0960472
2	GO:0070302	regulation of stress-activated protein kinase signaling cascade	7.12792	13	0.135417	0.0378231	0.0960472
2	GO:0010740	positive regulation of intracellular protein kinase cascade	6.10686	27	0.28125	0.0388313	0.0978273
2	GO:0016568	chromatin modification	6.67622	7	0.0729167	0.0387297	0.0978617
2	GO:0009893	positive regulation of metabolic process	4.51494	55	0.572917	0.0388908	0.0978802
2	GO:0031325	positive regulation of cellular metabolic process	4.69968	54	0.5625	0.0390737	0.0979535
2	GO:0034645	cellular macromolecule biosynthetic process	6.48746	16	0.166667	0.0390161	0.098002
2	GO:0070887	cellular response to chemical stimulus	4.28169	51	0.53125	0.0392391	0.0981748
2	GO:0050817	coagulation	7.3574	20	0.208333	0.0393392	0.0982322
2	GO:0007596	blood coagulation	7.3574	20	0.208333	0.0393392	0.0982322
2	GO:0007599	hemostasis	7.3574	20	0.208333	0.0393392	0.0982322
2	GO:0051223	regulation of protein transport	7.60067	15	0.15625	0.0411404	0.101733
2	GO:0048518	positive regulation of biological process	2.52976	71	0.739583	0.0413011	0.102031
2	GO:0044238	primary metabolic process	3.38407	86	0.895833	0.0415453	0.102336
2	GO:0048513	organ development	3.72353	30	0.3125	0.0423672	0.10416
2	GO:0006367	transcription initiation from RNA polymerase II promoter	8.3574	3	0.03125	0.0425062	0.104199
2	GO:0006352	transcription initiation, DNA-dependent	8.30849	3	0.03125	0.0425062	0.104199
2	GO:0032269	negative regulation of cellular protein metabolic process	7.46049	17	0.177083	0.0428432	0.104925
2	GO:0045596	negative regulation of cell differentiation	6.72353	9	0.09375	0.0432795	0.105688
2	GO:0010324	membrane invagination	8.46049	11	0.114583	0.0432619	0.105747
2	GO:0032940	secretion by cell	8.26119	11	0.114583	0.0432619	0.105747
2	GO:0006897	endocytosis	8.46049	11	0.114583	0.0432619	0.105747
2	GO:0043122	regulation of I-kappaB kinase/NF-kappaB cascade	8.40803	11	0.114583	0.0432619	0.105747
2	GO:0010467	gene expression	6.48746	16	0.166667	0.0448348	0.108036
2	GO:0010506	regulation of autophagy	10.0455	5	0.0520833	0.0449656	0.108147
2	GO:0009583	detection of light stimulus	9.89345	5	0.0520833	0.0449656	0.108147
2	GO:0050854	regulation of antigen receptor-mediated signaling pathway	10.0455	5	0.0520833	0.0449656	0.108147
2	GO:0008277	regulation of G-protein coupled receptor protein signaling pathway	10.0455	5	0.0520833	0.0449656	0.108147
2	GO:0007602	phototransduction	10.0455	5	0.0520833	0.0449656	0.108147
2	GO:0010676	positive regulation of cellular carbohydrate metabolic process	9.89345	5	0.0520833	0.0449656	0.108147
2	GO:0009584	detection of visible light	10.0455	5	0.0520833	0.0449656	0.108147
2	GO:0030193	regulation of blood coagulation	10.0455	5	0.0520833	0.0449656	0.108147
2	GO:0031294	lymphocyte costimulation	10.0455	5	0.0520833	0.0449656	0.108147
2	GO:0031295	T cell costimulation	10.0455	5	0.0520833	0.0449656	0.108147
2	GO:0050818	regulation of coagulation	10.0455	5	0.0520833	0.0449656	0.108147
2	GO:0023057	negative regulation of signaling	6.13857	24	0.25	0.0450612	0.108172
2	GO:0043408	regulation of MAPKKK cascade	5.98656	27	0.28125	0.0456206	0.109001
2	GO:0009891	positive regulation of biosynthetic process	5.58602	40	0.416667	0.0456872	0.109058
2	GO:0010741	negative regulation of intracellular protein kinase cascade	7.96745	10	0.104167	0.0458108	0.109251
2	GO:0051302	regulation of cell division	8.63042	10	0.104167	0.0458108	0.109251
2	GO:0045184	establishment of protein localization	8.12792	10	0.104167	0.0458108	0.109251
2	GO:0032388	positive regulation of intracellular transport	8.57153	10	0.104167	0.0458108	0.109251
2	GO:0002521	leukocyte differentiation	7.19301	5	0.0520833	0.0463394	0.110099
2	GO:0048522	positive regulation of cellular process	3.09514	67	0.697917	0.0467487	0.110762
2	GO:0023014	signal transduction by phosphorylation	7.75595	16	0.166667	0.0469518	0.11114
2	GO:0015031	protein transport	8.69182	9	0.09375	0.0480429	0.113092
2	GO:0090407	organophosphate biosynthetic process	8.82306	9	0.09375	0.0480429	0.113092
2	GO:0046777	protein autophosphorylation	7.2381	10	0.104167	0.0484519	0.113321
2	GO:0042535	positive regulation of tumor necrosis factor biosynthetic process	11.2154	3	0.03125	0.0484448	0.113409
2	GO:0071621	granulocyte chemotaxis	11.2154	3	0.03125	0.0484448	0.113409
2	GO:0035088	establishment or maintenance of apical/basal cell polarity	11.2154	3	0.03125	0.0484448	0.113409
2	GO:0031998	regulation of fatty acid beta-oxidation	11.2154	3	0.03125	0.0484448	0.113409
2	GO:0042534	regulation of tumor necrosis factor biosynthetic process	11.2154	3	0.03125	0.0484448	0.113409
2	GO:0034123	positive regulation of toll-like receptor signaling pathway	11.2154	3	0.03125	0.0484448	0.113409
2	GO:0002282	microglial cell activation involved in immune response	11.2154	3	0.03125	0.0484448	0.113409
2	GO:0032292	peripheral nervous system axon ensheathment	11.2154	3	0.03125	0.0484448	0.113409
2	GO:0016045	detection of bacterium	10.6304	3	0.03125	0.0484448	0.113409
2	GO:0035404	histone-serine phosphorylation	10.408	3	0.03125	0.0484448	0.113409
2	GO:0051385	response to mineralocorticoid stimulus	11.2154	3	0.03125	0.0484448	0.113409
2	GO:2000191	regulation of fatty acid transport	11.2154	3	0.03125	0.0484448	0.113409
2	GO:0061245	establishment or maintenance of bipolar cell polarity	11.2154	3	0.03125	0.0484448	0.113409
2	GO:0042058	regulation of epidermal growth factor receptor signaling pathway	11.2154	3	0.03125	0.0484448	0.113409
2	GO:0050995	negative regulation of lipid catabolic process	11.2154	3	0.03125	0.0484448	0.113409
2	GO:0030593	neutrophil chemotaxis	11.2154	3	0.03125	0.0484448	0.113409
2	GO:0032647	regulation of interferon-alpha production	11.2154	3	0.03125	0.0484448	0.113409
2	GO:0030838	positive regulation of actin filament polymerization	11.2154	3	0.03125	0.0484448	0.113409
2	GO:0032273	positive regulation of protein polymerization	11.2154	3	0.03125	0.0484448	0.113409
2	GO:0002027	regulation of heart rate	11.2154	3	0.03125	0.0484448	0.113409
2	GO:0042059	negative regulation of epidermal growth factor receptor signaling pathway	11.2154	3	0.03125	0.0484448	0.113409
2	GO:0010507	negative regulation of autophagy	11.2154	3	0.03125	0.0484448	0.113409
2	GO:0010829	negative regulation of glucose transport	11.2154	3	0.03125	0.0484448	0.113409
2	GO:0010882	regulation of cardiac muscle contraction by calcium ion signaling	11.2154	3	0.03125	0.0484448	0.113409
2	GO:0022011	myelination in peripheral nervous system	11.2154	3	0.03125	0.0484448	0.113409
2	GO:0031333	negative regulation of protein complex assembly	11.2154	3	0.03125	0.0484448	0.113409
2	GO:0046326	positive regulation of glucose import	11.2154	3	0.03125	0.0484448	0.113409
2	GO:0050922	negative regulation of chemotaxis	10.408	3	0.03125	0.0484448	0.113409
2	GO:0051412	response to corticosterone stimulus	11.2154	3	0.03125	0.0484448	0.113409
2	GO:0032467	positive regulation of cytokinesis	11.2154	3	0.03125	0.0484448	0.113409
2	GO:0015980	energy derivation by oxidation of organic compounds	9.63042	6	0.0625	0.0491945	0.114532
2	GO:0061041	regulation of wound healing	9.63042	6	0.0625	0.0491945	0.114532
2	GO:0031331	positive regulation of cellular catabolic process	9.40803	6	0.0625	0.0491945	0.114532
2	GO:0016567	protein ubiquitination	9.40803	6	0.0625	0.0491945	0.114532
2	GO:0007163	establishment or maintenance of cell polarity	9.63042	6	0.0625	0.0491945	0.114532
2	GO:0043409	negative regulation of MAPKKK cascade	8.63042	8	0.0833333	0.0496924	0.115375
2	GO:0033674	positive regulation of kinase activity	6.3952	23	0.239583	0.0499375	0.115839
2	GO:0009968	negative regulation of signal transduction	6.18196	23	0.239583	0.0499375	0.115839
3	GO:0018212	peptidyl-tyrosine modification	7.06563	7	0.7	0.000268944	0.00223127
3	GO:0018108	peptidyl-tyrosine phosphorylation	7.06563	7	0.7	0.000268944	0.00223127
3	GO:0034446	substrate adhesion-dependent cell spreading	10.2154	3	0.3	0.000649392	0.00441067
3	GO:0022610	biological adhesion	7.66079	5	0.5	0.00138373	0.00788448
3	GO:0007155	cell adhesion	7.66079	5	0.5	0.00138373	0.00788448
3	GO:0031589	cell-substrate adhesion	9.30849	3	0.3	0.00309478	0.0145701
3	GO:0032649	regulation of interferon-gamma production	9.30849	3	0.3	0.00309478	0.0145701
3	GO:0001779	natural killer cell differentiation	11.2154	2	0.2	0.00349756	0.0158793
3	GO:0018193	peptidyl-amino acid modification	6.21538	7	0.7	0.00512081	0.0212077
3	GO:0001961	positive regulation of cytokine-mediated signaling pathway	10.8935	2	0.2	0.00574869	0.0230581
3	GO:0048538	thymus development	10.8935	2	0.2	0.00574869	0.0230581
3	GO:0060760	positive regulation of response to cytokine stimulus	10.8935	2	0.2	0.00574869	0.0230581
3	GO:0030101	natural killer cell activation	10.8935	2	0.2	0.00574869	0.0230581
3	GO:0060068	vagina development	10.6304	2	0.2	0.00850384	0.0311196
3	GO:0030540	female genitalia development	10.6304	2	0.2	0.00850384	0.0311196
3	GO:0043277	apoptotic cell clearance	10.6304	2	0.2	0.00850384	0.0311196
3	GO:0051963	regulation of synapse assembly	10.408	2	0.2	0.0117408	0.0402473
3	GO:0016477	cell migration	6.63042	5	0.5	0.0118125	0.0403303
3	GO:0051249	regulation of lymphocyte activation	7.2381	4	0.4	0.0118124	0.040384
3	GO:0051674	localization of cell	6.61547	5	0.5	0.0126746	0.0424207
3	GO:0046777	protein autophosphorylation	7.2381	5	0.5	0.0126746	0.0424207
3	GO:0048870	cell motility	6.61547	5	0.5	0.0126746	0.0424207
3	GO:0046649	lymphocyte activation	7.19301	4	0.4	0.015444	0.0489861
3	GO:0007249	I-kappaB kinase/NF-kappaB cascade	10.2154	2	0.2	0.0154379	0.0490278
3	GO:0050807	regulation of synapse organization	10.2154	2	0.2	0.0154379	0.0490278
3	GO:0050803	regulation of synapse structure and activity	10.2154	2	0.2	0.0154379	0.0490278
3	GO:0002694	regulation of leukocyte activation	7.04546	4	0.4	0.0182356	0.055293
3	GO:0048806	genitalia development	9.89345	2	0.2	0.0195742	0.0582425
3	GO:0045321	leukocyte activation	6.85783	4	0.4	0.0285326	0.0780585
3	GO:0050865	regulation of cell activation	6.85783	4	0.4	0.0285326	0.0780585
3	GO:0042129	regulation of T cell proliferation	9.40803	2	0.2	0.0290835	0.0788879
3	GO:0048013	ephrin receptor signaling pathway	9.75595	2	0.2	0.0290835	0.0788879
3	GO:0045621	positive regulation of lymphocyte differentiation	9.30849	2	0.2	0.0290835	0.0788879
3	GO:0002822	regulation of adaptive immune response based on somatic recombination of immune receptors built from immunoglobulin superfamily domains	9.21538	2	0.2	0.0290835	0.0788879
3	GO:0002819	regulation of adaptive immune response	9.12792	2	0.2	0.0344175	0.0895417
3	GO:0040011	locomotion	6.07583	5	0.5	0.035064	0.0905761
3	GO:0030098	lymphocyte differentiation	7.66079	3	0.3	0.0377952	0.0960722
3	GO:0006928	cellular component movement	6.30849	5	0.5	0.0387977	0.0979364
3	GO:0048534	hemopoietic or lymphoid organ development	6.46049	4	0.4	0.0394765	0.0984787
3	GO:0032481	positive regulation of type I interferon production	9.30849	2	0.2	0.0401125	0.0998696
3	GO:0051250	negative regulation of lymphocyte activation	9.30849	2	0.2	0.0401125	0.0998696
3	GO:0043491	protein kinase B signaling cascade	9.51494	2	0.2	0.0401125	0.0998696
3	GO:0002520	immune system development	6.3952	4	0.4	0.0444881	0.107813
3	GO:0048513	organ development	3.72353	7	0.7	0.0466966	0.110741
4	GO:0044238	primary metabolic process	3.38407	2	0.2	1.2696e-05	0.000267246
4	GO:0060405	regulation of penile erection	11.2154	3	0.3	4.90117e-05	0.000633669
4	GO:0044237	cellular metabolic process	2.91389	3	0.3	0.000141472	0.00136488
4	GO:0043170	macromolecule metabolic process	3.84906	2	0.2	0.00020968	0.00181651
4	GO:0008217	regulation of blood pressure	9.21538	4	0.4	0.000268153	0.00223198
4	GO:0006936	muscle contraction	9.04546	4	0.4	0.000268153	0.00223198
4	GO:0044260	cellular macromolecule metabolic process	3.92998	2	0.2	0.000317749	0.00251337
4	GO:0003013	circulatory system process	7.89345	5	0.5	0.000320408	0.00252656
4	GO:0008015	blood circulation	7.89345	5	0.5	0.000320408	0.00252656
4	GO:0030803	negative regulation of cyclic nucleotide biosynthetic process	10.408	3	0.3	0.000411507	0.00306465
4	GO:0030809	negative regulation of nucleotide biosynthetic process	10.408	3	0.3	0.000411507	0.00306465
4	GO:0030800	negative regulation of cyclic nucleotide metabolic process	10.408	3	0.3	0.000411507	0.00306465
4	GO:0030818	negative regulation of cAMP biosynthetic process	10.408	3	0.3	0.000411507	0.00306465
4	GO:0030815	negative regulation of cAMP metabolic process	10.408	3	0.3	0.000411507	0.00306465
4	GO:0003012	muscle system process	8.82306	4	0.4	0.000455713	0.00332579
4	GO:0008152	metabolic process	2.76314	4	0.4	0.000542079	0.00384589
4	GO:0045980	negative regulation of nucleotide metabolic process	10.2154	3	0.3	0.000649392	0.00441067
4	GO:0006140	regulation of nucleotide metabolic process	7.89345	5	0.5	0.000708763	0.00477572
4	GO:0051480	cytosolic calcium ion homeostasis	8.69182	4	0.4	0.0013132	0.00763636
4	GO:0007204	elevation of cytosolic calcium ion concentration	8.75595	4	0.4	0.0013132	0.00763636
4	GO:0048484	enteric nervous system development	11.6304	2	0.2	0.00177329	0.00954875
4	GO:0007567	parturition	11.6304	2	0.2	0.00177329	0.00954875
4	GO:0007585	respiratory gaseous exchange	11.6304	2	0.2	0.00177329	0.00954875
4	GO:0007186	G-protein coupled receptor signaling pathway	6.84034	6	0.6	0.002773	0.013453
4	GO:0072503	cellular divalent inorganic cation homeostasis	8.3574	4	0.4	0.00295234	0.0140291
4	GO:0006874	cellular calcium ion homeostasis	8.40803	4	0.4	0.00295234	0.0140291
4	GO:0006873	cellular ion homeostasis	7.28464	5	0.5	0.00335507	0.0154248
4	GO:0055074	calcium ion homeostasis	8.3574	4	0.4	0.00339969	0.0155458
4	GO:0031650	regulation of heat generation	11.2154	2	0.2	0.00349756	0.0158793
4	GO:0045777	positive regulation of blood pressure	11.2154	2	0.2	0.00349756	0.0158793
4	GO:0031620	regulation of fever generation	11.2154	2	0.2	0.00349756	0.0158793
4	GO:0014829	vascular smooth muscle contraction	11.2154	2	0.2	0.00349756	0.0158793
4	GO:0048483	autonomic nervous system development	11.2154	2	0.2	0.00349756	0.0158793
4	GO:0055082	cellular chemical homeostasis	7.2381	5	0.5	0.00370095	0.0164796
4	GO:0045761	regulation of adenylate cyclase activity	9.21538	3	0.3	0.0038845	0.0170583
4	GO:0051048	negative regulation of secretion	9.12792	3	0.3	0.0038845	0.0170583
4	GO:0019233	sensory perception of pain	9.30849	3	0.3	0.0038845	0.0170583
4	GO:0031279	regulation of cyclase activity	9.21538	3	0.3	0.0038845	0.0170583
4	GO:0051339	regulation of lyase activity	9.21538	3	0.3	0.0038845	0.0170583
4	GO:0072507	divalent inorganic cation homeostasis	8.26119	4	0.4	0.00389238	0.0170635
4	GO:0006875	cellular metal ion homeostasis	8.17099	4	0.4	0.00389238	0.0170635
4	GO:0030003	cellular cation homeostasis	8.12792	4	0.4	0.00389238	0.0170635
4	GO:0051049	regulation of transport	5.54296	7	0.7	0.00400762	0.0174485
4	GO:0019725	cellular homeostasis	7.14929	5	0.5	0.00447157	0.0191413
4	GO:0060359	response to ammonium ion	9.30849	3	0.3	0.00478858	0.0201595
4	GO:0008344	adult locomotory behavior	10.8935	2	0.2	0.00574869	0.0230581
4	GO:0032228	regulation of synaptic transmission, GABAergic	10.8935	2	0.2	0.00574869	0.0230581
4	GO:0002690	positive regulation of leukocyte chemotaxis	10.408	2	0.2	0.00574869	0.0230581
4	GO:0050729	positive regulation of inflammatory response	9.12792	3	0.3	0.00581218	0.0232032
4	GO:0055080	cation homeostasis	7.78912	4	0.4	0.00711663	0.0273394
4	GO:0055065	metal ion homeostasis	7.92998	4	0.4	0.00711663	0.0273394
4	GO:0050801	ion homeostasis	6.96745	5	0.5	0.0075008	0.028345
4	GO:0030817	regulation of cAMP biosynthetic process	8.82306	3	0.3	0.00823631	0.0304468
4	GO:0030814	regulation of cAMP metabolic process	8.82306	3	0.3	0.00823631	0.0304468
4	GO:0007194	negative regulation of adenylate cyclase activity	10.6304	2	0.2	0.00850384	0.0311196
4	GO:0050433	regulation of catecholamine secretion	10.6304	2	0.2	0.00850384	0.0311196
4	GO:0014032	neural crest cell development	10.6304	2	0.2	0.00850384	0.0311196
4	GO:0002687	positive regulation of leukocyte migration	9.89345	2	0.2	0.00850384	0.0311196
4	GO:0051350	negative regulation of lyase activity	10.6304	2	0.2	0.00850384	0.0311196
4	GO:0031280	negative regulation of cyclase activity	10.6304	2	0.2	0.00850384	0.0311196
4	GO:0042310	vasoconstriction	10.6304	2	0.2	0.00850384	0.0311196
4	GO:0043900	regulation of multi-organism process	8.51494	3	0.3	0.00964499	0.0345511
4	GO:0050727	regulation of inflammatory response	7.89345	4	0.4	0.00974042	0.0348439
4	GO:0032496	response to lipopolysaccharide	7.92998	4	0.4	0.0107428	0.0376885
4	GO:0030808	regulation of nucleotide biosynthetic process	8.69182	3	0.3	0.0111895	0.038881
4	GO:0030802	regulation of cyclic nucleotide biosynthetic process	8.69182	3	0.3	0.0111895	0.038881
4	GO:0006939	smooth muscle contraction	10.2154	2	0.2	0.0117408	0.0402473
4	GO:0051952	regulation of amine transport	9.63042	2	0.2	0.0117408	0.0402473
4	GO:0014033	neural crest cell differentiation	10.408	2	0.2	0.0117408	0.0402473
4	GO:2000241	regulation of reproductive process	8.40803	3	0.3	0.0128731	0.0428038
4	GO:0030799	regulation of cyclic nucleotide metabolic process	8.63042	3	0.3	0.0128731	0.0428038
4	GO:0043279	response to alkaloid	8.51494	3	0.3	0.0128731	0.0428038
4	GO:0032101	regulation of response to external stimulus	6.64553	5	0.5	0.0145328	0.0466774
4	GO:0048016	inositol phosphate-mediated signaling	10.2154	2	0.2	0.0154379	0.0490278
4	GO:0002688	regulation of leukocyte chemotaxis	9.51494	2	0.2	0.0154379	0.0490278
4	GO:0003014	renal system process	10.0455	2	0.2	0.0154379	0.0490278
4	GO:0007613	memory	10.2154	2	0.2	0.0154379	0.0490278
4	GO:0014073	response to tropane	10.2154	2	0.2	0.0154379	0.0490278
4	GO:0002673	regulation of acute inflammatory response	10.0455	2	0.2	0.0154379	0.0490278
4	GO:0042220	response to cocaine	10.2154	2	0.2	0.0154379	0.0490278
4	GO:0032846	positive regulation of homeostatic process	10.2154	2	0.2	0.0154379	0.0490278
4	GO:0007200	activation of phospholipase C activity by G-protein coupled receptor protein signaling pathway coupled to IP3 second messenger	10.2154	2	0.2	0.0154379	0.0490278
4	GO:0051240	positive regulation of multicellular organismal process	5.88446	5	0.5	0.0155314	0.0491411
4	GO:0048878	chemical homeostasis	6.43402	5	0.5	0.016578	0.0516819
4	GO:0051046	regulation of secretion	7.12792	4	0.4	0.0168016	0.0522511
4	GO:0002237	response to molecule of bacterial origin	7.26119	4	0.4	0.0168016	0.0522511
4	GO:0007610	behavior	7.12792	4	0.4	0.0182356	0.055293
4	GO:0050795	regulation of behavior	8.12792	3	0.3	0.0187832	0.0564827
4	GO:0043278	response to morphine	10.0455	2	0.2	0.0195742	0.0582425
4	GO:0030595	leukocyte chemotaxis	8.82306	2	0.2	0.0195742	0.0582425
4	GO:2000243	positive regulation of reproductive process	10.0455	2	0.2	0.0195742	0.0582425
4	GO:0014072	response to isoquinoline alkaloid	10.0455	2	0.2	0.0195742	0.0582425
4	GO:0045833	negative regulation of lipid metabolic process	9.89345	2	0.2	0.0195742	0.0582425
4	GO:0048565	digestive tract development	8.12792	3	0.3	0.0234596	0.0677456
4	GO:0007600	sensory perception	8.3574	3	0.3	0.0234596	0.0677456
4	GO:0030534	adult behavior	9.89345	2	0.2	0.0241294	0.0690534
4	GO:0032879	regulation of localization	4.78493	7	0.7	0.025763	0.0725866
4	GO:0007568	aging	8.30849	3	0.3	0.026023	0.0731574
4	GO:0043269	regulation of ion transport	7.63042	3	0.3	0.026023	0.0731574
4	GO:0032103	positive regulation of response to external stimulus	8.0861	3	0.3	0.026023	0.0731574
4	GO:0051704	multi-organism process	5.66079	6	0.6	0.0260626	0.073188
4	GO:0009617	response to bacterium	6.96745	4	0.4	0.0266077	0.0741464
4	GO:0006793	phosphorus metabolic process	4.71156	2	0.2	0.0273005	0.0757455
4	GO:0003008	system process	5.61547	6	0.6	0.0273318	0.0757499
4	GO:0006796	phosphate-containing compound metabolic process	4.71554	2	0.2	0.0283755	0.0777958
4	GO:0055123	digestive system development	8.00593	3	0.3	0.0287378	0.0784514
4	GO:0031644	regulation of neurological system process	7.82306	3	0.3	0.0287378	0.0784514
4	GO:0051966	regulation of synaptic transmission, glutamatergic	9.75595	2	0.2	0.0290835	0.0788879
4	GO:0050880	regulation of blood vessel size	9.51494	2	0.2	0.0290835	0.0788879
4	GO:0035150	regulation of tube size	9.51494	2	0.2	0.0290835	0.0788879
4	GO:0060341	regulation of cellular localization	6.43402	5	0.5	0.0315822	0.0842302
4	GO:0044057	regulation of system process	6.80599	4	0.4	0.032643	0.0862467
4	GO:0010035	response to inorganic substance	6.96745	4	0.4	0.032643	0.0862467
4	GO:0002685	regulation of leukocyte migration	8.89345	2	0.2	0.0344175	0.0895417
4	GO:0043207	response to external biotic stimulus	7.48746	4	0.4	0.0348308	0.0901566
4	GO:0050877	neurological system process	6.21538	5	0.5	0.0368989	0.094359
4	GO:0051707	response to other organism	6.51494	4	0.4	0.0371084	0.0947994
4	GO:0014031	mesenchymal cell development	9.40803	2	0.2	0.0401125	0.0998696
4	GO:0007565	female pregnancy	9.04546	2	0.2	0.0401125	0.0998696
4	GO:0051924	regulation of calcium ion transport	8.96745	2	0.2	0.0401125	0.0998696
4	GO:0060326	cell chemotaxis	8.57153	2	0.2	0.0401125	0.0998696
4	GO:0045664	regulation of neuron differentiation	7.75595	3	0.3	0.0411189	0.101778
4	GO:0009607	response to biotic stimulus	5.89345	4	0.4	0.0444881	0.107813
4	GO:0051960	regulation of nervous system development	6.69182	4	0.4	0.0444881	0.107813
4	GO:0019932	second-messenger-mediated signaling	8.00593	3	0.3	0.0445945	0.107968
4	GO:0050921	positive regulation of chemotaxis	9.12792	2	0.2	0.0461505	0.109958
4	GO:0014070	response to organic cyclic compound	6.63042	5	0.5	0.0470488	0.111266
5	GO:0009058	biosynthetic process	4.39201	40	0.769231	1.56578e-12	9.97009e-10
5	GO:0044249	cellular biosynthetic process	4.49087	39	0.75	7.35163e-12	2.67494e-09
5	GO:0030522	intracellular receptor mediated signaling pathway	7.69182	21	0.403846	3.52606e-10	9.97875e-08
5	GO:0034641	cellular nitrogen compound metabolic process	4.67622	39	0.75	6.70233e-10	1.55189e-07
5	GO:0071407	cellular response to organic cyclic compound	7.82306	21	0.403846	6.45496e-10	1.64408e-07
5	GO:0006366	transcription from RNA polymerase II promoter	7.85783	20	0.384615	1.97935e-09	3.87801e-07
5	GO:0006807	nitrogen compound metabolic process	4.61547	39	0.75	9.24193e-09	1.38466e-06
5	GO:0018130	heterocycle biosynthetic process	6.52888	29	0.557692	1.91849e-08	2.44319e-06
5	GO:0046483	heterocycle metabolic process	5.62292	36	0.692308	3.29381e-08	3.99492e-06
5	GO:0044271	cellular nitrogen compound biosynthetic process	6.43402	29	0.557692	3.60644e-08	4.17527e-06
5	GO:0006357	regulation of transcription from RNA polymerase II promoter	6.06563	30	0.576923	5.28767e-08	4.80989e-06
5	GO:0034645	cellular macromolecule biosynthetic process	6.48746	29	0.557692	6.63328e-08	5.82585e-06
5	GO:0034654	nucleobase-containing compound biosynthetic process	6.51494	28	0.538462	8.04856e-08	6.6128e-06
5	GO:0009059	macromolecule biosynthetic process	6.46049	29	0.557692	8.92587e-08	7.10443e-06
5	GO:0019438	aromatic compound biosynthetic process	6.75595	28	0.538462	1.09093e-07	8.17232e-06
5	GO:0045944	positive regulation of transcription from RNA polymerase II promoter	7.12792	24	0.461538	1.19565e-07	8.70089e-06
5	GO:0016070	RNA metabolic process	6.63042	27	0.519231	1.28927e-07	9.1216e-06
5	GO:0006139	nucleobase-containing compound metabolic process	4.75595	35	0.673077	1.36812e-07	9.17002e-06
5	GO:0009991	response to extracellular stimulus	7.51494	20	0.384615	1.77661e-07	1.13126e-05
5	GO:0006725	cellular aromatic compound metabolic process	5.94859	35	0.673077	2.78586e-07	1.68943e-05
5	GO:0045893	positive regulation of transcription, DNA-dependent	6.84034	26	0.5	2.74979e-07	1.70822e-05
5	GO:0014070	response to organic cyclic compound	6.63042	27	0.519231	3.18022e-07	1.88373e-05
5	GO:0051254	positive regulation of RNA metabolic process	6.75595	26	0.5	3.72557e-07	2.1566e-05
5	GO:0031667	response to nutrient levels	7.57153	19	0.365385	5.03122e-07	2.66969e-05
5	GO:0048513	organ development	3.72353	37	0.711538	5.38708e-07	2.80018e-05
5	GO:0016310	phosphorylation	4.836	9	0.173077	9.16778e-07	4.67007e-05
5	GO:0006979	response to oxidative stress	8.00593	15	0.288462	1.1846e-06	5.38783e-05
5	GO:0006629	lipid metabolic process	6.85783	19	0.365385	1.12419e-06	5.40246e-05
5	GO:0007584	response to nutrient	8.04546	16	0.307692	1.16682e-06	5.40343e-05
5	GO:0006468	protein phosphorylation	5.09644	8	0.153846	1.1489e-06	5.419e-05
5	GO:0010558	negative regulation of macromolecule biosynthetic process	6.84034	22	0.423077	1.33411e-06	5.57046e-05
5	GO:0051173	positive regulation of nitrogen compound metabolic process	6.09644	31	0.596154	1.53834e-06	6.02794e-05
5	GO:0010628	positive regulation of gene expression	6.64553	27	0.519231	1.67428e-06	6.18028e-05
5	GO:0042180	cellular ketone metabolic process	8.04546	13	0.25	1.62702e-06	6.2788e-05
5	GO:0006367	transcription initiation from RNA polymerase II promoter	8.3574	14	0.269231	1.89865e-06	6.90837e-05
5	GO:0006352	transcription initiation, DNA-dependent	8.30849	14	0.269231	1.89865e-06	6.90837e-05
5	GO:0032774	RNA biosynthetic process	6.85783	24	0.461538	2.11215e-06	7.36937e-05
5	GO:0006351	transcription, DNA-dependent	6.85783	24	0.461538	2.11215e-06	7.36937e-05
5	GO:0042221	response to chemical stimulus	3.2267	45	0.865385	3.34183e-06	0.000105082
5	GO:0031641	regulation of myelination	10.2154	7	0.134615	3.85804e-06	0.000116981
5	GO:0033993	response to lipid	6.64553	26	0.5	4.45867e-06	0.000132049
5	GO:2000113	negative regulation of cellular macromolecule biosynthetic process	6.94859	21	0.403846	4.89271e-06	0.000138464
5	GO:0071383	cellular response to steroid hormone stimulus	8.0861	14	0.269231	5.28406e-06	0.000146288
5	GO:0044281	small molecule metabolic process	5.56433	26	0.5	5.72799e-06	0.000155204
5	GO:0010467	gene expression	6.48746	26	0.5	5.72799e-06	0.000155204
5	GO:0034599	cellular response to oxidative stress	8.89345	11	0.211538	6.0132e-06	0.000157893
5	GO:0006082	organic acid metabolic process	8.26119	11	0.211538	6.0132e-06	0.000157893
5	GO:0043436	oxoacid metabolic process	8.26119	11	0.211538	6.0132e-06	0.000157893
5	GO:0019752	carboxylic acid metabolic process	8.26119	11	0.211538	6.0132e-06	0.000157893
5	GO:0048545	response to steroid hormone stimulus	7.0861	19	0.365385	6.7731e-06	0.000172511
5	GO:0051253	negative regulation of RNA metabolic process	7.04546	20	0.384615	6.85161e-06	0.000172783
5	GO:0045892	negative regulation of transcription, DNA-dependent	7.10686	20	0.384615	6.85161e-06	0.000172783
5	GO:0009314	response to radiation	7.48746	16	0.307692	6.71943e-06	0.000172873
5	GO:0061035	regulation of cartilage development	9.40803	8	0.153846	7.56446e-06	0.000180062
5	GO:0015711	organic anion transport	9.75595	8	0.153846	7.56446e-06	0.000180062
5	GO:0006820	anion transport	9.63042	8	0.153846	7.56446e-06	0.000180062
5	GO:0061008	hepaticobiliary system development	9.40803	9	0.173077	8.5821e-06	0.000196924
5	GO:0001889	liver development	9.40803	9	0.173077	8.5821e-06	0.000196924
5	GO:0033273	response to vitamin	8.40803	13	0.25	8.56952e-06	0.000198423
5	GO:0009890	negative regulation of biosynthetic process	6.57153	22	0.423077	1.08507e-05	0.000238247
5	GO:0009891	positive regulation of biosynthetic process	5.58602	32	0.615385	1.18102e-05	0.000252778
5	GO:0043401	steroid hormone mediated signaling pathway	8.57153	12	0.230769	1.34752e-05	0.00027457
5	GO:0043066	negative regulation of apoptotic process	6.85783	22	0.423077	1.42379e-05	0.000285543
5	GO:0051252	regulation of RNA metabolic process	5.20976	33	0.634615	1.48715e-05	0.000293626
5	GO:0010941	regulation of cell death	5.75595	31	0.596154	1.65541e-05	0.000314652
5	GO:0031328	positive regulation of cellular biosynthetic process	5.77244	31	0.596154	1.65541e-05	0.000314652
5	GO:0010629	negative regulation of gene expression	7.00593	20	0.384615	1.694e-05	0.000319602
5	GO:0044270	cellular nitrogen compound catabolic process	8.75595	8	0.153846	2.03516e-05	0.000355037
5	GO:0046700	heterocycle catabolic process	8.75595	8	0.153846	2.03516e-05	0.000355037
5	GO:0034655	nucleobase-containing compound catabolic process	8.75595	8	0.153846	2.03516e-05	0.000355037
5	GO:0048608	reproductive structure development	7.51494	13	0.25	2.22312e-05	0.000377485
5	GO:0043069	negative regulation of programmed cell death	6.80599	22	0.423077	2.40632e-05	0.000395412
5	GO:0060548	negative regulation of cell death	6.80599	22	0.423077	2.40632e-05	0.000395412
5	GO:0071396	cellular response to lipid	7.43402	18	0.346154	2.39298e-05	0.000395775
5	GO:0031323	regulation of cellular metabolic process	3.47729	45	0.865385	2.59102e-05	0.000415052
5	GO:0042981	regulation of apoptotic process	5.82306	30	0.576923	2.77425e-05	0.000430855
5	GO:0072523	purine-containing compound catabolic process	9.12792	6	0.115385	2.80378e-05	0.000432802
5	GO:0046434	organophosphate catabolic process	10.408	6	0.115385	2.80378e-05	0.000432802
5	GO:0006195	purine nucleotide catabolic process	9.89345	6	0.115385	2.80378e-05	0.000432802
5	GO:0009166	nucleotide catabolic process	9.89345	6	0.115385	2.80378e-05	0.000432802
5	GO:0042127	regulation of cell proliferation	5.47391	29	0.557692	3.06954e-05	0.000465364
5	GO:0044248	cellular catabolic process	6.98656	14	0.269231	3.05513e-05	0.000465953
5	GO:0019222	regulation of metabolic process	3.14124	46	0.884615	3.25663e-05	0.000490807
5	GO:0009888	tissue development	4.99138	23	0.442308	3.39317e-05	0.000502465
5	GO:0031327	negative regulation of cellular biosynthetic process	6.63042	21	0.403846	3.52433e-05	0.000515888
5	GO:0007568	aging	8.30849	12	0.230769	3.64442e-05	0.000530419
5	GO:0009755	hormone-mediated signaling pathway	8.46049	12	0.230769	3.64442e-05	0.000530419
5	GO:0070887	cellular response to chemical stimulus	4.28169	37	0.711538	3.66635e-05	0.00053058
5	GO:0090304	nucleic acid metabolic process	5.55717	29	0.557692	3.74421e-05	0.000535758
5	GO:0009893	positive regulation of metabolic process	4.51494	39	0.75	3.95893e-05	0.000551005
5	GO:0008202	steroid metabolic process	8.75595	9	0.173077	3.9479e-05	0.000552489
5	GO:0044255	cellular lipid metabolic process	7.38249	14	0.269231	4.50522e-05	0.000597646
5	GO:2001141	regulation of RNA biosynthetic process	5.21538	32	0.615385	4.48808e-05	0.000598489
5	GO:0006355	regulation of transcription, DNA-dependent	5.24384	32	0.615385	4.48808e-05	0.000598489
5	GO:0051171	regulation of nitrogen compound metabolic process	4.77659	38	0.730769	4.56741e-05	0.000599649
5	GO:0000003	reproduction	5.76417	21	0.403846	4.54881e-05	0.000600302
5	GO:0022414	reproductive process	5.78912	21	0.403846	4.54881e-05	0.000600302
5	GO:0035264	multicellular organism growth	9.89345	7	0.134615	4.652e-05	0.000607622
5	GO:0030518	intracellular steroid hormone receptor signaling pathway	9.89345	7	0.134615	4.652e-05	0.000607622
5	GO:0043067	regulation of programmed cell death	5.78075	30	0.576923	4.94446e-05	0.000636038
5	GO:0045934	negative regulation of nucleobase-containing compound metabolic process	6.84034	20	0.384615	5.08502e-05	0.000650831
5	GO:0045935	positive regulation of nucleobase-containing compound metabolic process	6.27287	27	0.519231	5.30381e-05	0.000662197
5	GO:0044267	cellular protein metabolic process	4.55005	18	0.346154	5.29949e-05	0.000664916
5	GO:0000302	response to reactive oxygen species	8.75595	10	0.192308	5.27793e-05	0.00066549
5	GO:0032102	negative regulation of response to external stimulus	8.12792	12	0.230769	5.73502e-05	0.000705657
5	GO:0003006	developmental process involved in reproduction	6.72353	16	0.307692	5.7687e-05	0.000706389
5	GO:0000122	negative regulation of transcription from RNA polymerase II promoter	7.66079	16	0.307692	5.7687e-05	0.000706389
5	GO:0051172	negative regulation of nitrogen compound metabolic process	6.80599	20	0.384615	6.57769e-05	0.00079778
5	GO:0010468	regulation of gene expression	4.80599	35	0.673077	7.12268e-05	0.000851712
5	GO:0032787	monocarboxylic acid metabolic process	8.75595	9	0.173077	7.52576e-05	0.000875256
5	GO:0043412	macromolecule modification	4.60067	18	0.346154	7.46456e-05	0.000876139
5	GO:0010033	response to organic substance	3.8145	39	0.75	7.56776e-05	0.00087614
5	GO:0031325	positive regulation of cellular metabolic process	4.69968	38	0.730769	7.44837e-05	0.000878287
5	GO:0040007	growth	7.51494	13	0.25	7.76023e-05	0.000878458
5	GO:0031348	negative regulation of defense response	8.75595	10	0.192308	9.04418e-05	0.000992911
5	GO:0048518	positive regulation of biological process	2.52976	46	0.884615	9.78952e-05	0.00106102
5	GO:0010212	response to ionizing radiation	9.21538	8	0.153846	9.92725e-05	0.00107139
5	GO:0045598	regulation of fat cell differentiation	9.40803	8	0.153846	9.92725e-05	0.00107139
5	GO:0019439	aromatic compound catabolic process	9.40803	8	0.153846	9.92725e-05	0.00107139
5	GO:0055088	lipid homeostasis	9.21538	6	0.115385	0.000100577	0.00107634
5	GO:0051704	multi-organism process	5.66079	26	0.5	0.000101473	0.00108138
5	GO:0010557	positive regulation of macromolecule biosynthetic process	5.99621	26	0.5	0.000101473	0.00108138
5	GO:0048856	anatomical structure development	2.86998	40	0.769231	0.000102114	0.00108369
5	GO:0006464	protein modification process	4.61547	18	0.346154	0.000104273	0.00108846
5	GO:0044106	cellular amine metabolic process	9.63042	7	0.134615	0.000114692	0.00115008
5	GO:0042542	response to hydrogen peroxide	9.04546	9	0.173077	0.000135006	0.00132765
5	GO:0050728	negative regulation of inflammatory response	9.04546	9	0.173077	0.000135006	0.00132765
5	GO:0048589	developmental growth	8.17099	11	0.211538	0.000145526	0.00139869
5	GO:0009628	response to abiotic stimulus	6.43402	22	0.423077	0.000157234	0.00149991
5	GO:0048731	system development	3.14392	38	0.730769	0.000162749	0.00151285
5	GO:0048523	negative regulation of cellular process	3.76005	39	0.75	0.000164095	0.00151431
5	GO:0006575	cellular modified amino acid metabolic process	10.6304	5	0.0961538	0.000196047	0.00172779
5	GO:0042454	ribonucleoside catabolic process	10.6304	5	0.0961538	0.000196047	0.00172779
5	GO:0009167	purine ribonucleoside monophosphate metabolic process	10.2154	5	0.0961538	0.000196047	0.00172779
5	GO:0009164	nucleoside catabolic process	10.408	5	0.0961538	0.000196047	0.00172779
5	GO:0006520	cellular amino acid metabolic process	10.6304	5	0.0961538	0.000196047	0.00172779
5	GO:0032330	regulation of chondrocyte differentiation	10.6304	5	0.0961538	0.000196047	0.00172779
5	GO:0008203	cholesterol metabolic process	10.6304	5	0.0961538	0.000196047	0.00172779
5	GO:0009161	ribonucleoside monophosphate metabolic process	10.2154	5	0.0961538	0.000196047	0.00172779
5	GO:0046130	purine ribonucleoside catabolic process	10.6304	5	0.0961538	0.000196047	0.00172779
5	GO:0045444	fat cell differentiation	10.408	5	0.0961538	0.000196047	0.00172779
5	GO:0006152	purine nucleoside catabolic process	10.408	5	0.0961538	0.000196047	0.00172779
5	GO:0010605	negative regulation of macromolecule metabolic process	5.96745	23	0.442308	0.000197345	0.00173323
5	GO:0009889	regulation of biosynthetic process	4.53942	37	0.711538	0.000213558	0.00184384
5	GO:0001666	response to hypoxia	8.46049	11	0.211538	0.000220519	0.00189112
5	GO:0044403	symbiosis, encompassing mutualism through parasitism	7.63042	13	0.25	0.000227792	0.00194043
5	GO:0044419	interspecies interaction between organisms	7.63042	13	0.25	0.000227792	0.00194043
5	GO:0051259	protein oligomerization	8.51494	10	0.192308	0.000236248	0.00199246
5	GO:0016125	sterol metabolic process	10.0455	6	0.115385	0.000270599	0.00223047
5	GO:0048732	gland development	7.17099	13	0.25	0.00031581	0.00251365
5	GO:0010035	response to inorganic substance	6.96745	16	0.307692	0.000325506	0.00255097
5	GO:0009719	response to endogenous stimulus	5.05047	30	0.576923	0.000335905	0.00260046
5	GO:0048519	negative regulation of biological process	3.42422	40	0.769231	0.000335203	0.00260293
5	GO:0009056	catabolic process	6.66079	14	0.269231	0.000334542	0.00260575
5	GO:0043627	response to estrogen stimulus	8.75595	9	0.173077	0.0003751	0.00283495
5	GO:2000112	regulation of cellular macromolecule biosynthetic process	5.02556	32	0.615385	0.000393854	0.00294178
5	GO:0031326	regulation of cellular biosynthetic process	4.65314	36	0.692308	0.000425814	0.00313453
5	GO:0032502	developmental process	2.7066	41	0.788462	0.000424625	0.00313484
5	GO:0071702	organic substance transport	7.54296	13	0.25	0.000431601	0.00316798
5	GO:0019219	regulation of nucleobase-containing compound metabolic process	4.87553	35	0.673077	0.000462138	0.00336305
5	GO:0019217	regulation of fatty acid metabolic process	9.51494	7	0.134615	0.000479308	0.00345835
5	GO:0034614	cellular response to reactive oxygen species	9.51494	7	0.134615	0.000479308	0.00345835
5	GO:0031324	negative regulation of cellular metabolic process	5.79753	24	0.461538	0.000498105	0.00357373
5	GO:0031668	cellular response to extracellular stimulus	8.51494	10	0.192308	0.000543293	0.0038438
5	GO:0048522	positive regulation of cellular process	3.09514	43	0.826923	0.000541546	0.00385284
5	GO:0006753	nucleoside phosphate metabolic process	7.82306	8	0.153846	0.000579049	0.00405175
5	GO:0009117	nucleotide metabolic process	7.82306	8	0.153846	0.000579049	0.00405175
5	GO:0048705	skeletal system morphogenesis	8.69182	8	0.153846	0.000579049	0.00405175
5	GO:0010556	regulation of macromolecule biosynthetic process	4.78493	33	0.634615	0.000598002	0.00417291
5	GO:0046128	purine ribonucleoside metabolic process	9.63042	6	0.115385	0.000606717	0.00421065
5	GO:0042278	purine nucleoside metabolic process	9.51494	6	0.115385	0.000606717	0.00421065
5	GO:0009119	ribonucleoside metabolic process	9.63042	6	0.115385	0.000606717	0.00421065
5	GO:0046942	carboxylic acid transport	10.2154	5	0.0961538	0.000616069	0.00421808
5	GO:0015849	organic acid transport	10.2154	5	0.0961538	0.000616069	0.00421808
5	GO:0017085	response to insecticide	10.408	5	0.0961538	0.000616069	0.00421808
5	GO:0042304	regulation of fatty acid biosynthetic process	10.408	5	0.0961538	0.000616069	0.00421808
5	GO:0007292	female gamete generation	10.408	5	0.0961538	0.000616069	0.00421808
5	GO:0006796	phosphate-containing compound metabolic process	4.71554	17	0.326923	0.000615389	0.00422478
5	GO:0030154	cell differentiation	4.04546	33	0.634615	0.000690861	0.00467985
5	GO:0048609	multicellular organismal reproductive process	7.17099	15	0.288462	0.000736134	0.00494705
5	GO:0032504	multicellular organism reproduction	7.17099	15	0.288462	0.000736134	0.00494705
5	GO:0033554	cellular response to stress	5.69182	22	0.423077	0.000760616	0.00507144
5	GO:0080090	regulation of primary metabolic process	3.52189	42	0.807692	0.000783714	0.00515793
5	GO:0007275	multicellular organismal development	2.95682	39	0.75	0.000787629	0.00517034
5	GO:0009892	negative regulation of metabolic process	5.64553	24	0.461538	0.000837488	0.00542769
5	GO:0044237	cellular metabolic process	2.91389	51	0.980769	0.000845133	0.00546333
5	GO:0030850	prostate gland development	8.82306	7	0.134615	0.000859344	0.00554114
5	GO:0006281	DNA repair	8.51494	7	0.134615	0.000859344	0.00554114
5	GO:0045137	development of primary sexual characteristics	8.30849	9	0.173077	0.00089306	0.00571514
5	GO:0048869	cellular developmental process	4.03051	33	0.634615	0.000916927	0.00583853
5	GO:0070482	response to oxygen levels	8.17099	11	0.211538	0.000929724	0.00587595
5	GO:0001890	placenta development	8.63042	8	0.153846	0.000934284	0.00589015
5	GO:0071310	cellular response to organic substance	4.66079	32	0.615385	0.000951234	0.00595281
5	GO:0032844	regulation of homeostatic process	7.51494	14	0.269231	0.000994344	0.00617706
5	GO:0071496	cellular response to external stimulus	8.00593	12	0.230769	0.00100234	0.00621161
5	GO:0009607	response to biotic stimulus	5.89345	16	0.307692	0.00108146	0.00655827
5	GO:0051094	positive regulation of developmental process	5.95799	21	0.403846	0.00110657	0.00664723
5	GO:0001501	skeletal system development	7.78912	10	0.192308	0.001128	0.00676006
5	GO:0001701	in utero embryonic development	8.30849	10	0.192308	0.001128	0.00676006
5	GO:0009116	nucleoside metabolic process	9.21538	6	0.115385	0.00119715	0.00707456
5	GO:0006631	fatty acid metabolic process	9.21538	6	0.115385	0.00119715	0.00707456
5	GO:0009411	response to UV	9.75595	6	0.115385	0.00119715	0.00707456
5	GO:0007548	sex differentiation	8.12792	9	0.173077	0.0013153	0.00763112
5	GO:0031669	cellular response to nutrient levels	8.63042	9	0.173077	0.0013153	0.00763112
5	GO:0015833	peptide transport	10.8935	4	0.0769231	0.00131027	0.00763676
5	GO:0032376	positive regulation of cholesterol transport	10.8935	4	0.0769231	0.00131027	0.00763676
5	GO:0030512	negative regulation of transforming growth factor beta receptor signaling pathway	10.8935	4	0.0769231	0.00131027	0.00763676
5	GO:0045923	positive regulation of fatty acid metabolic process	10.8935	4	0.0769231	0.00131027	0.00763676
5	GO:0009146	purine nucleoside triphosphate catabolic process	10.8935	4	0.0769231	0.00131027	0.00763676
5	GO:0030521	androgen receptor signaling pathway	10.8935	4	0.0769231	0.00131027	0.00763676
5	GO:0042157	lipoprotein metabolic process	10.8935	4	0.0769231	0.00131027	0.00763676
5	GO:0010745	negative regulation of macrophage derived foam cell differentiation	10.8935	4	0.0769231	0.00131027	0.00763676
5	GO:0009261	ribonucleotide catabolic process	10.2154	4	0.0769231	0.00131027	0.00763676
5	GO:0032373	positive regulation of sterol transport	10.8935	4	0.0769231	0.00131027	0.00763676
5	GO:0042886	amide transport	10.8935	4	0.0769231	0.00131027	0.00763676
5	GO:0003416	endochondral bone growth	10.8935	4	0.0769231	0.00131027	0.00763676
5	GO:0009112	nucleobase metabolic process	10.2154	4	0.0769231	0.00131027	0.00763676
5	GO:0002790	peptide secretion	10.8935	4	0.0769231	0.00131027	0.00763676
5	GO:0071158	positive regulation of cell cycle arrest	10.8935	4	0.0769231	0.00131027	0.00763676
5	GO:0009154	purine ribonucleotide catabolic process	10.2154	4	0.0769231	0.00131027	0.00763676
5	GO:0009143	nucleoside triphosphate catabolic process	10.8935	4	0.0769231	0.00131027	0.00763676
5	GO:0010875	positive regulation of cholesterol efflux	10.8935	4	0.0769231	0.00131027	0.00763676
5	GO:0007507	heart development	6.77244	13	0.25	0.00132677	0.00768018
5	GO:0051241	negative regulation of multicellular organismal process	7.04546	13	0.25	0.00132677	0.00768018
5	GO:0007166	cell surface receptor signaling pathway	4.3512	17	0.326923	0.00139501	0.00789575
5	GO:0055086	nucleobase-containing small molecule metabolic process	7.17099	8	0.153846	0.00144645	0.00813269
5	GO:2000106	regulation of leukocyte apoptosis	9.04546	7	0.134615	0.00144439	0.00813905
5	GO:0090287	regulation of cellular response to growth factor stimulus	9.30849	7	0.134615	0.00144439	0.00813905
5	GO:0006163	purine nucleotide metabolic process	7.96745	7	0.134615	0.00144439	0.00813905
5	GO:0010876	lipid localization	9.30849	5	0.0961538	0.00147522	0.00823989
5	GO:0006869	lipid transport	9.30849	5	0.0961538	0.00147522	0.00823989
5	GO:0032374	regulation of cholesterol transport	10.2154	5	0.0961538	0.00147522	0.00823989
5	GO:0048384	retinoic acid receptor signaling pathway	10.2154	5	0.0961538	0.00147522	0.00823989
5	GO:0060350	endochondral bone morphogenesis	10.0455	5	0.0961538	0.00147522	0.00823989
5	GO:0032371	regulation of sterol transport	10.2154	5	0.0961538	0.00147522	0.00823989
5	GO:0051262	protein tetramerization	10.2154	5	0.0961538	0.00147522	0.00823989
5	GO:0007169	transmembrane receptor protein tyrosine kinase signaling pathway	5.71554	4	0.0769231	0.00147383	0.00825019
5	GO:0008285	negative regulation of cell proliferation	7.0861	15	0.288462	0.00149009	0.00826854
5	GO:0006793	phosphorus metabolic process	4.71156	18	0.346154	0.00149528	0.00827931
5	GO:0071216	cellular response to biotic stimulus	8.0861	10	0.192308	0.00157351	0.00867472
5	GO:0045597	positive regulation of cell differentiation	6.61547	16	0.307692	0.0016619	0.00910291
5	GO:0001101	response to acid	8.0861	11	0.211538	0.00171069	0.00927048
5	GO:0019216	regulation of lipid metabolic process	7.48746	13	0.25	0.00170827	0.00927711
5	GO:0033036	macromolecule localization	6.9116	13	0.25	0.00170827	0.00927711
5	GO:0042493	response to drug	7.92998	12	0.230769	0.00174739	0.00942927
5	GO:0043009	chordate embryonic development	7.21538	12	0.230769	0.00174739	0.00942927
5	GO:0032501	multicellular organismal process	2.54207	46	0.884615	0.00189831	0.00996905
5	GO:0060255	regulation of macromolecule metabolic process	3.58057	39	0.75	0.00195018	0.010137
5	GO:0009410	response to xenobiotic stimulus	9.63042	6	0.115385	0.00214753	0.0109614
5	GO:0070301	cellular response to hydrogen peroxide	9.63042	6	0.115385	0.00214753	0.0109614
5	GO:0051216	cartilage development	9.30849	6	0.115385	0.00214753	0.0109614
5	GO:0048568	embryonic organ development	7.60067	10	0.192308	0.00215344	0.0109696
5	GO:0023057	negative regulation of signaling	6.13857	18	0.346154	0.00224158	0.011328
5	GO:0048585	negative regulation of response to stimulus	5.65314	20	0.384615	0.00224781	0.011337
5	GO:0009792	embryo development ending in birth or egg hatching	7.19301	12	0.230769	0.00226536	0.0113804
5	GO:2001234	negative regulation of apoptotic signaling pathway	8.89345	7	0.134615	0.00230182	0.0115408
5	GO:0008406	gonad development	8.82306	7	0.134615	0.00230182	0.0115408
5	GO:0010648	negative regulation of cell communication	6.11735	18	0.346154	0.00268237	0.0131132
5	GO:0009790	embryo development	5.95799	15	0.288462	0.00281927	0.0136515
5	GO:0014074	response to purine-containing compound	10.0455	5	0.0961538	0.002981	0.0141389
5	GO:2000243	positive regulation of reproductive process	10.0455	5	0.0961538	0.002981	0.0141389
5	GO:0030330	DNA damage response, signal transduction by p53 class mediator	9.63042	5	0.0961538	0.002981	0.0141389
5	GO:2000177	regulation of neural precursor cell proliferation	9.63042	5	0.0961538	0.002981	0.0141389
5	GO:0050793	regulation of developmental process	4.55717	30	0.576923	0.0033231	0.0153055
5	GO:0044238	primary metabolic process	3.38407	50	0.961538	0.00340069	0.0155225
5	GO:0010565	regulation of cellular ketone metabolic process	8.89345	7	0.134615	0.00350776	0.015869
5	GO:0072521	purine-containing compound metabolic process	7.38249	7	0.134615	0.00350776	0.015869
5	GO:0009308	amine metabolic process	8.69182	7	0.134615	0.00350776	0.015869
5	GO:0046683	response to organophosphorus	10.6304	4	0.0769231	0.00353872	0.0159807
5	GO:0045600	positive regulation of fat cell differentiation	10.6304	4	0.0769231	0.00353872	0.0159807
5	GO:0010874	regulation of cholesterol efflux	10.6304	4	0.0769231	0.00353872	0.0159807
5	GO:0015718	monocarboxylic acid transport	10.6304	4	0.0769231	0.00353872	0.0159807
5	GO:0055081	anion homeostasis	10.6304	4	0.0769231	0.00353872	0.0159807
5	GO:0009144	purine nucleoside triphosphate metabolic process	10.0455	4	0.0769231	0.00353872	0.0159807
5	GO:0055012	ventricular cardiac muscle cell differentiation	10.6304	4	0.0769231	0.00353872	0.0159807
5	GO:0032370	positive regulation of lipid transport	10.6304	4	0.0769231	0.00353872	0.0159807
5	GO:0006396	RNA processing	10.408	4	0.0769231	0.00353872	0.0159807
5	GO:0009141	nucleoside triphosphate metabolic process	10.0455	4	0.0769231	0.00353872	0.0159807
5	GO:0010888	negative regulation of lipid storage	10.408	4	0.0769231	0.00353872	0.0159807
5	GO:0045595	regulation of cell differentiation	5.26119	25	0.480769	0.00355312	0.015989
5	GO:0009653	anatomical structure morphogenesis	4.37618	25	0.480769	0.00355312	0.015989
5	GO:0034504	protein localization to nucleus	9.40803	6	0.115385	0.00357743	0.01607
5	GO:0010817	regulation of hormone levels	9.12792	6	0.115385	0.00357743	0.01607
5	GO:0035556	intracellular signal transduction	5.06563	14	0.269231	0.00359857	0.0161082
5	GO:0009416	response to light stimulus	8.12792	9	0.173077	0.00362144	0.0161821
5	GO:0009968	negative regulation of signal transduction	6.18196	17	0.326923	0.00375409	0.016629
5	GO:0008152	metabolic process	2.76314	51	0.980769	0.0038072	0.016835
5	GO:0001655	urogenital system development	7.00593	10	0.192308	0.00383227	0.0168872
5	GO:0055114	oxidation-reduction process	8.26119	10	0.192308	0.00383227	0.0168872
5	GO:0048598	embryonic morphogenesis	6.75595	10	0.192308	0.00383227	0.0168872
5	GO:0046777	protein autophosphorylation	7.2381	2	0.0384615	0.00390636	0.0170954
5	GO:0072358	cardiovascular system development	5.93926	17	0.326923	0.00446335	0.0191383
5	GO:0051093	negative regulation of developmental process	6.27287	17	0.326923	0.00446335	0.0191383
5	GO:0072359	circulatory system development	5.93926	17	0.326923	0.00446335	0.0191383
5	GO:0051248	negative regulation of protein metabolic process	7.21538	14	0.269231	0.00471645	0.0199548
5	GO:0051969	regulation of transmission of nerve impulse	7.89345	9	0.173077	0.00486815	0.0203934
5	GO:0042692	muscle cell differentiation	8.04546	9	0.173077	0.00486815	0.0203934
5	GO:0050727	regulation of inflammatory response	7.89345	11	0.211538	0.00488908	0.0204139
5	GO:0008104	protein localization	7.26119	11	0.211538	0.00488908	0.0204139
5	GO:0045596	negative regulation of cell differentiation	6.72353	15	0.288462	0.00502593	0.0209167
5	GO:0033189	response to vitamin A	9.04546	7	0.134615	0.00514542	0.021275
5	GO:0009887	organ morphogenesis	5.85783	13	0.25	0.00525616	0.0216275
5	GO:0072331	signal transduction by p53 class mediator	9.51494	5	0.0961538	0.00535528	0.0218939
5	GO:0060349	bone morphogenesis	9.63042	5	0.0961538	0.00535528	0.0218939
5	GO:0007569	cell aging	9.75595	5	0.0961538	0.00535528	0.0218939
5	GO:0071705	nitrogen compound transport	9.30849	6	0.115385	0.00561599	0.0226687
5	GO:0009259	ribonucleotide metabolic process	8.69182	6	0.115385	0.00561599	0.0226687
5	GO:0009150	purine ribonucleotide metabolic process	8.69182	6	0.115385	0.00561599	0.0226687
5	GO:0044265	cellular macromolecule catabolic process	9.12792	6	0.115385	0.00561599	0.0226687
5	GO:0030855	epithelial cell differentiation	7.3574	11	0.211538	0.00616903	0.0244363
5	GO:0009725	response to hormone stimulus	6.18196	21	0.403846	0.00633482	0.0249765
5	GO:0051234	establishment of localization	5.20976	21	0.403846	0.00633482	0.0249765
5	GO:0031644	regulation of neurological system process	7.82306	9	0.173077	0.00642877	0.0252297
5	GO:0010038	response to metal ion	8.00593	9	0.173077	0.00642877	0.0252297
5	GO:0016032	viral reproduction	8.26119	9	0.173077	0.00642877	0.0252297
5	GO:0010942	positive regulation of cell death	7.12792	14	0.269231	0.00688613	0.0266956
5	GO:0060429	epithelium development	6.02556	14	0.269231	0.00688613	0.0266956
5	GO:0046890	regulation of lipid biosynthetic process	8.75595	7	0.134615	0.00730316	0.0277629
5	GO:0003002	regionalization	7.96745	7	0.134615	0.00730316	0.0277629
5	GO:0070243	regulation of thymocyte apoptosis	10.408	4	0.0769231	0.00743559	0.0281822
5	GO:0032720	negative regulation of tumor necrosis factor production	10.408	4	0.0769231	0.00743559	0.0281822
5	GO:0009855	determination of bilateral symmetry	10.0455	4	0.0769231	0.00743559	0.0281822
5	GO:0010743	regulation of macrophage derived foam cell differentiation	10.408	4	0.0769231	0.00743559	0.0281822
5	GO:0090288	negative regulation of cellular response to growth factor stimulus	10.408	4	0.0769231	0.00743559	0.0281822
5	GO:0010332	response to gamma radiation	10.408	4	0.0769231	0.00743559	0.0281822
5	GO:0017015	regulation of transforming growth factor beta receptor signaling pathway	10.408	4	0.0769231	0.00743559	0.0281822
5	GO:0035050	embryonic heart tube development	10.408	4	0.0769231	0.00743559	0.0281822
5	GO:0010883	regulation of lipid storage	10.2154	4	0.0769231	0.00743559	0.0281822
5	GO:0007243	intracellular protein kinase cascade	6.32056	3	0.0576923	0.00761889	0.0286637
5	GO:0071495	cellular response to endogenous stimulus	5.88446	22	0.423077	0.00779067	0.0292667
5	GO:0007389	pattern specification process	7.38249	8	0.153846	0.00813673	0.0302103
5	GO:0009636	response to toxin	8.63042	8	0.153846	0.00813673	0.0302103
5	GO:0045184	establishment of protein localization	8.12792	8	0.153846	0.00813673	0.0302103
5	GO:0019637	organophosphate metabolic process	7.3574	10	0.192308	0.00815686	0.0302409
5	GO:0030072	peptide hormone secretion	11.2154	3	0.0576923	0.00827759	0.0305551
5	GO:0002828	regulation of type 2 immune response	11.2154	3	0.0576923	0.00827759	0.0305551
5	GO:0071843	cellular component biogenesis at cellular level	11.2154	3	0.0576923	0.00827759	0.0305551
5	GO:0072413	signal transduction involved in mitotic cell cycle checkpoint	11.2154	3	0.0576923	0.00827759	0.0305551
5	GO:0072431	signal transduction involved in mitotic cell cycle G1/S transition DNA damage checkpoint	11.2154	3	0.0576923	0.00827759	0.0305551
5	GO:0071779	G1/S transition checkpoint	11.2154	3	0.0576923	0.00827759	0.0305551
5	GO:0046034	ATP metabolic process	11.2154	3	0.0576923	0.00827759	0.0305551
5	GO:0072474	signal transduction involved in mitotic cell cycle G1/S checkpoint	11.2154	3	0.0576923	0.00827759	0.0305551
5	GO:0009207	purine ribonucleoside triphosphate catabolic process	11.2154	3	0.0576923	0.00827759	0.0305551
5	GO:0055072	iron ion homeostasis	11.2154	3	0.0576923	0.00827759	0.0305551
5	GO:0031571	mitotic cell cycle G1/S transition DNA damage checkpoint	11.2154	3	0.0576923	0.00827759	0.0305551
5	GO:0009203	ribonucleoside triphosphate catabolic process	11.2154	3	0.0576923	0.00827759	0.0305551
5	GO:0031575	mitotic cell cycle G1/S transition checkpoint	11.2154	3	0.0576923	0.00827759	0.0305551
5	GO:0030520	intracellular estrogen receptor signaling pathway	11.2154	3	0.0576923	0.00827759	0.0305551
5	GO:0033032	regulation of myeloid cell apoptosis	11.2154	3	0.0576923	0.00827759	0.0305551
5	GO:0072395	signal transduction involved in cell cycle checkpoint	10.8935	3	0.0576923	0.00827759	0.0305551
5	GO:0048147	negative regulation of fibroblast proliferation	11.2154	3	0.0576923	0.00827759	0.0305551
5	GO:0071479	cellular response to ionizing radiation	11.2154	3	0.0576923	0.00827759	0.0305551
5	GO:0072401	signal transduction involved in DNA integrity checkpoint	10.8935	3	0.0576923	0.00827759	0.0305551
5	GO:0072404	signal transduction involved in G1/S transition checkpoint	11.2154	3	0.0576923	0.00827759	0.0305551
5	GO:0002052	positive regulation of neuroblast proliferation	11.2154	3	0.0576923	0.00827759	0.0305551
5	GO:0032331	negative regulation of chondrocyte differentiation	11.2154	3	0.0576923	0.00827759	0.0305551
5	GO:0072422	signal transduction involved in DNA damage checkpoint	10.8935	3	0.0576923	0.00827759	0.0305551
5	GO:0042743	hydrogen peroxide metabolic process	11.2154	3	0.0576923	0.00827759	0.0305551
5	GO:0006974	response to DNA damage stimulus	7.3574	9	0.173077	0.00835267	0.0307876
5	GO:0032355	response to estradiol stimulus	9.30849	6	0.115385	0.00839706	0.0309065
5	GO:0071466	cellular response to xenobiotic stimulus	9.75595	5	0.0961538	0.00882039	0.0321395
5	GO:0060348	bone development	9.30849	5	0.0961538	0.00882039	0.0321395
5	GO:0006805	xenobiotic metabolic process	9.75595	5	0.0961538	0.00882039	0.0321395
5	GO:0035051	cardiac cell differentiation	9.40803	5	0.0961538	0.00882039	0.0321395
5	GO:0009126	purine nucleoside monophosphate metabolic process	9.51494	5	0.0961538	0.00882039	0.0321395
5	GO:0048145	regulation of fibroblast proliferation	9.75595	5	0.0961538	0.00882039	0.0321395
5	GO:0006810	transport	5.32056	20	0.384615	0.00883698	0.032154
5	GO:0050896	response to stimulus	1.90875	51	0.980769	0.00902951	0.0326678
5	GO:0019538	protein metabolic process	4.45716	25	0.480769	0.0100797	0.0359062
5	GO:0061061	muscle structure development	7.63042	10	0.192308	0.0102328	0.0363499
5	GO:0018193	peptidyl-amino acid modification	6.21538	7	0.134615	0.0105861	0.0374482
5	GO:0006066	alcohol metabolic process	7.63042	9	0.173077	0.0106913	0.0376634
5	GO:0071219	cellular response to molecule of bacterial origin	8.21538	8	0.153846	0.0107225	0.0377212
5	GO:0043523	regulation of neuron apoptosis	8.51494	8	0.153846	0.0107225	0.0377212
5	GO:0043065	positive regulation of apoptotic process	7.2381	13	0.25	0.0112066	0.0388873
5	GO:0044057	regulation of system process	6.80599	13	0.25	0.0112066	0.0388873
5	GO:0043933	macromolecular complex subunit organization	6.2381	15	0.288462	0.0117458	0.0402106
5	GO:0042303	molting cycle	8.96745	6	0.115385	0.0120542	0.0409361
5	GO:0042770	signal transduction in response to DNA damage	8.69182	6	0.115385	0.0120542	0.0409361
5	GO:0042633	hair cycle	8.96745	6	0.115385	0.0120542	0.0409361
5	GO:0009952	anterior/posterior pattern specification	8.96745	6	0.115385	0.0120542	0.0409361
5	GO:0022404	molting cycle process	8.96745	6	0.115385	0.0120542	0.0409361
5	GO:0001942	hair follicle development	8.96745	6	0.115385	0.0120542	0.0409361
5	GO:0022405	hair cycle process	8.96745	6	0.115385	0.0120542	0.0409361
5	GO:0032269	negative regulation of cellular protein metabolic process	7.46049	12	0.230769	0.0126746	0.0424765
5	GO:0043207	response to external biotic stimulus	7.48746	13	0.25	0.0133159	0.0437622
5	GO:0042445	hormone metabolic process	9.75595	4	0.0769231	0.013396	0.0439119
5	GO:0070507	regulation of microtubule cytoskeleton organization	10.0455	4	0.0769231	0.013396	0.0439119
5	GO:0009799	specification of symmetry	9.89345	4	0.0769231	0.013396	0.0439119
5	GO:0000077	DNA damage checkpoint	10.0455	4	0.0769231	0.013396	0.0439119
5	GO:0031570	DNA integrity checkpoint	10.0455	4	0.0769231	0.013396	0.0439119
5	GO:2000107	negative regulation of leukocyte apoptosis	10.0455	4	0.0769231	0.013396	0.0439119
5	GO:0002673	regulation of acute inflammatory response	10.0455	4	0.0769231	0.013396	0.0439119
5	GO:0034284	response to monosaccharide stimulus	10.2154	4	0.0769231	0.013396	0.0439119
5	GO:0032886	regulation of microtubule-based process	9.89345	4	0.0769231	0.013396	0.0439119
5	GO:0006790	sulfur compound metabolic process	9.63042	4	0.0769231	0.013396	0.0439119
5	GO:0009100	glycoprotein metabolic process	9.63042	4	0.0769231	0.013396	0.0439119
5	GO:0007276	gamete generation	8.0861	9	0.173077	0.0134972	0.0441869
5	GO:0001819	positive regulation of cytokine production	6.58602	9	0.173077	0.0134972	0.0441869
5	GO:0021700	developmental maturation	8.75595	7	0.134615	0.0135442	0.0442839
5	GO:0015031	protein transport	8.69182	7	0.134615	0.0135442	0.0442839
5	GO:2000241	regulation of reproductive process	8.40803	7	0.134615	0.0135442	0.0442839
5	GO:0007612	learning	9.63042	5	0.0961538	0.0135867	0.0443659
5	GO:0046546	development of primary male sexual characteristics	9.51494	5	0.0961538	0.0135867	0.0443659
5	GO:0046661	male sex differentiation	9.51494	5	0.0961538	0.0135867	0.0443659
5	GO:0065003	macromolecular complex assembly	6.33274	14	0.269231	0.0136426	0.0444912
5	GO:0032101	regulation of response to external stimulus	6.64553	15	0.288462	0.0137067	0.0445862
5	GO:0009605	response to external stimulus	5.46719	26	0.5	0.0141046	0.0457635
5	GO:0051707	response to other organism	6.51494	13	0.25	0.0157252	0.0496307
5	GO:0043068	positive regulation of programmed cell death	7.19301	13	0.25	0.0157252	0.0496307
5	GO:0048660	regulation of smooth muscle cell proliferation	9.12792	6	0.115385	0.0167159	0.0520481
5	GO:0071456	cellular response to hypoxia	9.12792	6	0.115385	0.0167159	0.0520481
5	GO:0032526	response to retinoic acid	9.12792	6	0.115385	0.0167159	0.0520481
5	GO:2001233	regulation of apoptotic signaling pathway	7.92998	9	0.173077	0.0168236	0.0522558
5	GO:0007346	regulation of mitotic cell cycle	7.54296	9	0.173077	0.0168236	0.0522558
5	GO:0006811	ion transport	7.89345	9	0.173077	0.0168236	0.0522558
5	GO:0050678	regulation of epithelial cell proliferation	7.92998	9	0.173077	0.0168236	0.0522558
5	GO:0002237	response to molecule of bacterial origin	7.26119	11	0.211538	0.0170495	0.0528286
5	GO:0051726	regulation of cell cycle	6.14929	17	0.326923	0.0174033	0.0535989
5	GO:0044283	small molecule biosynthetic process	8.51494	7	0.134615	0.017809	0.0543881
5	GO:0045926	negative regulation of growth	8.75595	7	0.134615	0.017809	0.0543881
5	GO:0008610	lipid biosynthetic process	8.46049	7	0.134615	0.017809	0.0543881
5	GO:2000021	regulation of ion homeostasis	8.63042	7	0.134615	0.017809	0.0543881
5	GO:0009617	response to bacterium	6.96745	12	0.230769	0.0179779	0.0547725
5	GO:0002764	immune response-regulating signaling pathway	5.2496	4	0.0769231	0.0180926	0.055056
5	GO:0032069	regulation of nuclease activity	10.6304	3	0.0576923	0.0187286	0.0563849
5	GO:0014823	response to activity	10.8935	3	0.0576923	0.0187286	0.0563849
5	GO:0006310	DNA recombination	10.408	3	0.0576923	0.0187286	0.0563849
5	GO:0009205	purine ribonucleoside triphosphate metabolic process	10.2154	3	0.0576923	0.0187286	0.0563849
5	GO:0055076	transition metal ion homeostasis	10.8935	3	0.0576923	0.0187286	0.0563849
5	GO:0051651	maintenance of location in cell	10.6304	3	0.0576923	0.0187286	0.0563849
5	GO:0009199	ribonucleoside triphosphate metabolic process	10.2154	3	0.0576923	0.0187286	0.0563849
5	GO:0070244	negative regulation of thymocyte apoptosis	10.8935	3	0.0576923	0.0187286	0.0563849
5	GO:0015908	fatty acid transport	10.8935	3	0.0576923	0.0187286	0.0563849
5	GO:0072593	reactive oxygen species metabolic process	10.408	3	0.0576923	0.0187286	0.0563849
5	GO:0051235	maintenance of location	10.6304	3	0.0576923	0.0187286	0.0563849
5	GO:0006302	double-strand break repair	10.6304	3	0.0576923	0.0187286	0.0563849
5	GO:0001836	release of cytochrome c from mitochondria	10.8935	3	0.0576923	0.0187286	0.0563849
5	GO:0032689	negative regulation of interferon-gamma production	10.8935	3	0.0576923	0.0187286	0.0563849
5	GO:0006446	regulation of translational initiation	10.8935	3	0.0576923	0.0187286	0.0563849
5	GO:0006260	DNA replication	10.2154	3	0.0576923	0.0187286	0.0563849
5	GO:0051591	response to cAMP	10.8935	3	0.0576923	0.0187286	0.0563849
5	GO:0032651	regulation of interleukin-1 beta production	10.8935	3	0.0576923	0.0187286	0.0563849
5	GO:0032496	response to lipopolysaccharide	7.92998	10	0.192308	0.0189489	0.0566466
5	GO:0008284	positive regulation of cell proliferation	6.32056	17	0.326923	0.0198505	0.0587897
5	GO:0071295	cellular response to vitamin	9.51494	5	0.0961538	0.0198425	0.0588346
5	GO:0009743	response to carbohydrate stimulus	9.51494	5	0.0961538	0.0198425	0.0588346
5	GO:0019693	ribose phosphate metabolic process	9.51494	5	0.0961538	0.0198425	0.0588346
5	GO:0035270	endocrine system development	9.21538	5	0.0961538	0.0198425	0.0588346
5	GO:0006014	D-ribose metabolic process	9.51494	5	0.0961538	0.0198425	0.0588346
5	GO:0051817	modification of morphology or physiology of other organism involved in symbiotic interaction	9.21538	5	0.0961538	0.0198425	0.0588346
5	GO:0071478	cellular response to radiation	9.40803	5	0.0961538	0.0198425	0.0588346
5	GO:0007565	female pregnancy	9.04546	5	0.0961538	0.0198425	0.0588346
5	GO:0009123	nucleoside monophosphate metabolic process	8.89345	5	0.0961538	0.0198425	0.0588346
5	GO:0035821	modification of morphology or physiology of other organism	9.21538	5	0.0961538	0.0198425	0.0588346
5	GO:0019321	pentose metabolic process	9.51494	5	0.0961538	0.0198425	0.0588346
5	GO:0032368	regulation of lipid transport	9.40803	5	0.0961538	0.0198425	0.0588346
5	GO:0090101	negative regulation of transmembrane receptor protein serine/threonine kinase signaling pathway	10.0455	4	0.0769231	0.0217279	0.0634645
5	GO:0010952	positive regulation of peptidase activity	9.75595	4	0.0769231	0.0217279	0.0634645
5	GO:0070232	regulation of T cell apoptosis	10.0455	4	0.0769231	0.0217279	0.0634645
5	GO:0007369	gastrulation	9.75595	4	0.0769231	0.0217279	0.0634645
5	GO:0043280	positive regulation of cysteine-type endopeptidase activity involved in apoptotic process	10.0455	4	0.0769231	0.0217279	0.0634645
5	GO:0010950	positive regulation of endopeptidase activity	9.75595	4	0.0769231	0.0217279	0.0634645
5	GO:2001056	positive regulation of cysteine-type endopeptidase activity	9.75595	4	0.0769231	0.0217279	0.0634645
5	GO:0009267	cellular response to starvation	10.0455	4	0.0769231	0.0217279	0.0634645
5	GO:0061053	somite development	9.89345	4	0.0769231	0.0217279	0.0634645
5	GO:0052547	regulation of peptidase activity	8.89345	6	0.115385	0.0225011	0.0654228
5	GO:0033365	protein localization to organelle	8.46049	6	0.115385	0.0225011	0.0654228
5	GO:0048562	embryonic organ morphogenesis	8.3574	6	0.115385	0.0225011	0.0654228
5	GO:0043281	regulation of cysteine-type endopeptidase activity involved in apoptotic process	9.04546	6	0.115385	0.0225011	0.0654228
5	GO:0052548	regulation of endopeptidase activity	8.89345	6	0.115385	0.0225011	0.0654228
5	GO:2000116	regulation of cysteine-type endopeptidase activity	8.89345	6	0.115385	0.0225011	0.0654228
5	GO:0071453	cellular response to oxygen levels	9.04546	6	0.115385	0.0225011	0.0654228
5	GO:0008544	epidermis development	7.46049	7	0.134615	0.0229522	0.0665065
5	GO:0051179	localization	4.62292	26	0.5	0.0238924	0.0687616
5	GO:0033674	positive regulation of kinase activity	6.3952	4	0.0769231	0.0253477	0.0715749
5	GO:0065008	regulation of biological quality	4.63042	33	0.634615	0.0259612	0.0730642
5	GO:2000026	regulation of multicellular organismal development	4.9116	24	0.461538	0.0263948	0.0738765
5	GO:0097190	apoptotic signaling pathway	7.78912	10	0.192308	0.0272617	0.0757203
5	GO:0008630	DNA damage response, signal transduction resulting in induction of apoptosis	9.40803	5	0.0961538	0.0277462	0.0763995
5	GO:0031670	cellular response to nutrient	9.40803	5	0.0961538	0.0277462	0.0763995
5	GO:0080134	regulation of response to stress	4.70363	21	0.403846	0.0277852	0.0764242
5	GO:0010604	positive regulation of macromolecule metabolic process	4.93461	29	0.557692	0.0276418	0.0765257
5	GO:0007186	G-protein coupled receptor signaling pathway	6.84034	4	0.0769231	0.0282949	0.0777424
5	GO:0009894	regulation of catabolic process	7.40803	11	0.211538	0.0284276	0.077855
5	GO:0009057	macromolecule catabolic process	8.3574	7	0.134615	0.0290527	0.0788882
5	GO:0051098	regulation of binding	8.40803	7	0.134615	0.0290527	0.0788882
5	GO:0010608	posttranscriptional regulation of gene expression	8.51494	7	0.134615	0.0290527	0.0788882
5	GO:0008629	induction of apoptosis by intracellular signals	8.82306	6	0.115385	0.0295156	0.0797202
5	GO:0007167	enzyme linked receptor protein signaling pathway	5.48067	8	0.153846	0.0295037	0.0797727
5	GO:0000165	MAPKKK cascade	6.80599	2	0.0384615	0.0312757	0.0836757
5	GO:0050817	coagulation	7.3574	3	0.0576923	0.0323071	0.0855365
5	GO:0007596	blood coagulation	7.3574	3	0.0576923	0.0323071	0.0855365
5	GO:0007599	hemostasis	7.3574	3	0.0576923	0.0323071	0.0855365
5	GO:0040029	regulation of gene expression, epigenetic	9.04546	4	0.0769231	0.032643	0.0862467
5	GO:2000045	regulation of G1/S transition of mitotic cell cycle	9.40803	4	0.0769231	0.032643	0.0862467
5	GO:0042594	response to starvation	9.89345	4	0.0769231	0.032643	0.0862467
5	GO:0051346	negative regulation of hydrolase activity	9.89345	4	0.0769231	0.032643	0.0862467
5	GO:0008584	male gonad development	9.89345	4	0.0769231	0.032643	0.0862467
5	GO:0046394	carboxylic acid biosynthetic process	9.75595	4	0.0769231	0.032643	0.0862467
5	GO:0016053	organic acid biosynthetic process	9.75595	4	0.0769231	0.032643	0.0862467
5	GO:2001020	regulation of response to DNA damage stimulus	9.75595	4	0.0769231	0.032643	0.0862467
5	GO:0055007	cardiac muscle cell differentiation	9.89345	4	0.0769231	0.032643	0.0862467
5	GO:0007005	mitochondrion organization	9.63042	4	0.0769231	0.032643	0.0862467
5	GO:0000075	cell cycle checkpoint	9.51494	4	0.0769231	0.032643	0.0862467
5	GO:0019218	regulation of steroid metabolic process	9.63042	4	0.0769231	0.032643	0.0862467
5	GO:0044003	modification by symbiont of host morphology or physiology	9.75595	4	0.0769231	0.032643	0.0862467
5	GO:2001237	negative regulation of extrinsic apoptotic signaling pathway	9.89345	4	0.0769231	0.032643	0.0862467
5	GO:0034613	cellular protein localization	7.72353	8	0.153846	0.0335215	0.0878387
5	GO:0070727	cellular macromolecule localization	7.72353	8	0.153846	0.0335215	0.0878387
5	GO:0010575	positive regulation vascular endothelial growth factor production	10.6304	3	0.0576923	0.0339184	0.0885145
5	GO:0046879	hormone secretion	10.6304	3	0.0576923	0.0339184	0.0885145
5	GO:0035137	hindlimb morphogenesis	10.6304	3	0.0576923	0.0339184	0.0885145
5	GO:0010660	regulation of muscle cell apoptosis	10.408	3	0.0576923	0.0339184	0.0885145
5	GO:0030888	regulation of B cell proliferation	10.6304	3	0.0576923	0.0339184	0.0885145
5	GO:2000108	positive regulation of leukocyte apoptosis	10.6304	3	0.0576923	0.0339184	0.0885145
5	GO:0070233	negative regulation of T cell apoptosis	10.6304	3	0.0576923	0.0339184	0.0885145
5	GO:0043277	apoptotic cell clearance	10.6304	3	0.0576923	0.0339184	0.0885145
5	GO:0045445	myoblast differentiation	10.6304	3	0.0576923	0.0339184	0.0885145
5	GO:0001947	heart looping	10.6304	3	0.0576923	0.0339184	0.0885145
5	GO:0007368	determination of left/right symmetry	10.2154	3	0.0576923	0.0339184	0.0885145
5	GO:0008306	associative learning	10.6304	3	0.0576923	0.0339184	0.0885145
5	GO:0048704	embryonic skeletal system morphogenesis	10.2154	3	0.0576923	0.0339184	0.0885145
5	GO:2000134	negative regulation of G1/S transition of mitotic cell cycle	10.6304	3	0.0576923	0.0339184	0.0885145
5	GO:0051402	neuron apoptosis	10.6304	3	0.0576923	0.0339184	0.0885145
5	GO:0070229	negative regulation of lymphocyte apoptosis	10.408	3	0.0576923	0.0339184	0.0885145
5	GO:0009914	hormone transport	10.6304	3	0.0576923	0.0339184	0.0885145
5	GO:0003143	embryonic heart tube morphogenesis	10.6304	3	0.0576923	0.0339184	0.0885145
5	GO:0070997	neuron death	10.6304	3	0.0576923	0.0339184	0.0885145
5	GO:0001960	negative regulation of cytokine-mediated signaling pathway	10.0455	3	0.0576923	0.0339184	0.0885145
5	GO:0001893	maternal placenta development	10.6304	3	0.0576923	0.0339184	0.0885145
5	GO:0008542	visual learning	10.6304	3	0.0576923	0.0339184	0.0885145
5	GO:0048820	hair follicle maturation	10.6304	3	0.0576923	0.0339184	0.0885145
5	GO:0001704	formation of primary germ layer	10.408	3	0.0576923	0.0339184	0.0885145
5	GO:0048566	embryonic digestive tract development	10.6304	3	0.0576923	0.0339184	0.0885145
5	GO:0035116	embryonic hindlimb morphogenesis	10.6304	3	0.0576923	0.0339184	0.0885145
5	GO:0032652	regulation of interleukin-1 production	10.6304	3	0.0576923	0.0339184	0.0885145
5	GO:0061371	determination of heart left/right asymmetry	10.6304	3	0.0576923	0.0339184	0.0885145
5	GO:0071391	cellular response to estrogen stimulus	10.6304	3	0.0576923	0.0339184	0.0885145
5	GO:0045666	positive regulation of neuron differentiation	10.6304	3	0.0576923	0.0339184	0.0885145
5	GO:2000179	positive regulation of neural precursor cell proliferation	10.2154	3	0.0576923	0.0339184	0.0885145
5	GO:0007632	visual behavior	10.6304	3	0.0576923	0.0339184	0.0885145
5	GO:0044262	cellular carbohydrate metabolic process	8.30849	7	0.134615	0.0361811	0.0929901
5	GO:0001657	ureteric bud development	9.12792	5	0.0961538	0.0374208	0.0955017
5	GO:0030308	negative regulation of cell growth	9.30849	5	0.0961538	0.0374208	0.0955017
5	GO:0003007	heart morphogenesis	8.17099	5	0.0961538	0.0374208	0.0955017
5	GO:0001817	regulation of cytokine production	5.73965	11	0.211538	0.0386203	0.097682
5	GO:0022402	cell cycle process	6.9116	11	0.211538	0.0386203	0.097682
5	GO:0034097	response to cytokine stimulus	7.19301	11	0.211538	0.0386203	0.097682
5	GO:0007268	synaptic transmission	7.3574	2	0.0384615	0.0397706	0.0991152
5	GO:0048017	inositol lipid-mediated signaling	7.72353	2	0.0384615	0.0397706	0.0991152
5	GO:0048015	phosphatidylinositol-mediated signaling	7.72353	2	0.0384615	0.0397706	0.0991152
5	GO:0048011	nerve growth factor receptor signaling pathway	7.72353	2	0.0384615	0.0397706	0.0991152
5	GO:0002768	immune response-regulating cell surface receptor signaling pathway	7.2381	3	0.0576923	0.0404318	0.100468
5	GO:0001934	positive regulation of protein phosphorylation	6.64553	6	0.115385	0.0408278	0.101156
5	GO:0023051	regulation of signaling	4.04295	32	0.615385	0.0424881	0.104255
5	GO:0010646	regulation of cell communication	4.39201	32	0.615385	0.0424881	0.104255
5	GO:0035295	tube development	6.55717	9	0.173077	0.0430383	0.105301
5	GO:0031329	regulation of cellular catabolic process	7.72353	9	0.173077	0.0430383	0.105301
5	GO:0019953	sexual reproduction	7.85783	9	0.173077	0.0430383	0.105301
5	GO:0051347	positive regulation of transferase activity	6.33274	5	0.0961538	0.0447699	0.107982
5	GO:0023014	signal transduction by phosphorylation	7.75595	2	0.0384615	0.0447663	0.108076
5	GO:0002757	immune response-activating signal transduction	5.3952	3	0.0576923	0.0451462	0.108172
5	GO:0002253	activation of immune response	5.3952	3	0.0576923	0.0451462	0.108172
5	GO:0044085	cellular component biogenesis	6.00593	15	0.288462	0.0452509	0.108321
5	GO:0042752	regulation of circadian rhythm	9.75595	4	0.0769231	0.046256	0.110004
5	GO:0030326	embryonic limb morphogenesis	9.04546	4	0.0769231	0.046256	0.110004
5	GO:0071299	cellular response to vitamin A	9.75595	4	0.0769231	0.046256	0.110004
5	GO:0031016	pancreas development	9.51494	4	0.0769231	0.046256	0.110004
5	GO:0071300	cellular response to retinoic acid	9.75595	4	0.0769231	0.046256	0.110004
5	GO:2001242	regulation of intrinsic apoptotic signaling pathway	9.63042	4	0.0769231	0.046256	0.110004
5	GO:0035113	embryonic appendage morphogenesis	9.04546	4	0.0769231	0.046256	0.110004
5	GO:0046889	positive regulation of lipid biosynthetic process	9.63042	4	0.0769231	0.046256	0.110004
5	GO:0031647	regulation of protein stability	9.75595	4	0.0769231	0.046256	0.110004
5	GO:0031099	regeneration	9.75595	4	0.0769231	0.046256	0.110004
5	GO:0070228	regulation of lymphocyte apoptosis	9.63042	4	0.0769231	0.046256	0.110004
5	GO:0016265	death	6.10686	18	0.346154	0.0472975	0.111543
5	GO:0051641	cellular localization	6.12792	14	0.269231	0.0472605	0.111559
5	GO:0005996	monosaccharide metabolic process	8.82306	6	0.115385	0.0475701	0.112082
5	GO:0006917	induction of apoptosis	8.63042	6	0.115385	0.0475701	0.112082
5	GO:0071222	cellular response to lipopolysaccharide	8.82306	6	0.115385	0.0475701	0.112082
5	GO:0012502	induction of programmed cell death	8.63042	6	0.115385	0.0475701	0.112082
5	GO:0043588	skin development	8.82306	6	0.115385	0.0475701	0.112082
5	GO:0090068	positive regulation of cell cycle process	8.75595	6	0.115385	0.0475701	0.112082
5	GO:0042745	circadian sleep/wake cycle	11.6304	2	0.0384615	0.0484093	0.113535
5	GO:0010662	regulation of striated muscle cell apoptosis	11.2154	2	0.0384615	0.0484093	0.113535
5	GO:0072077	renal vesicle morphogenesis	11.2154	2	0.0384615	0.0484093	0.113535
5	GO:0048617	embryonic foregut morphogenesis	11.6304	2	0.0384615	0.0484093	0.113535
5	GO:0051289	protein homotetramerization	11.6304	2	0.0384615	0.0484093	0.113535
5	GO:0009156	ribonucleoside monophosphate biosynthetic process	11.2154	2	0.0384615	0.0484093	0.113535
5	GO:0032350	regulation of hormone metabolic process	11.6304	2	0.0384615	0.0484093	0.113535
5	GO:0071542	dopaminergic neuron differentiation	11.6304	2	0.0384615	0.0484093	0.113535
5	GO:0015914	phospholipid transport	11.2154	2	0.0384615	0.0484093	0.113535
5	GO:0007625	grooming behavior	11.6304	2	0.0384615	0.0484093	0.113535
5	GO:0016241	regulation of macroautophagy	11.6304	2	0.0384615	0.0484093	0.113535
5	GO:0042455	ribonucleoside biosynthetic process	11.6304	2	0.0384615	0.0484093	0.113535
5	GO:0010661	positive regulation of muscle cell apoptosis	11.6304	2	0.0384615	0.0484093	0.113535
5	GO:0046129	purine ribonucleoside biosynthetic process	11.6304	2	0.0384615	0.0484093	0.113535
5	GO:0032352	positive regulation of hormone metabolic process	11.6304	2	0.0384615	0.0484093	0.113535
5	GO:0045187	regulation of circadian sleep/wake cycle, sleep	11.6304	2	0.0384615	0.0484093	0.113535
5	GO:0043094	cellular metabolic compound salvage	10.2154	2	0.0384615	0.0484093	0.113535
5	GO:0048512	circadian behavior	11.6304	2	0.0384615	0.0484093	0.113535
5	GO:0001885	endothelial cell development	11.6304	2	0.0384615	0.0484093	0.113535
5	GO:0043372	positive regulation of CD4-positive, alpha-beta T cell differentiation	11.6304	2	0.0384615	0.0484093	0.113535
5	GO:0045624	positive regulation of T-helper cell differentiation	11.6304	2	0.0384615	0.0484093	0.113535
5	GO:0032673	regulation of interleukin-4 production	11.6304	2	0.0384615	0.0484093	0.113535
5	GO:0003337	mesenchymal to epithelial transition involved in metanephros morphogenesis	11.6304	2	0.0384615	0.0484093	0.113535
5	GO:0042749	regulation of circadian sleep/wake cycle	11.6304	2	0.0384615	0.0484093	0.113535
5	GO:0032107	regulation of response to nutrient levels	11.2154	2	0.0384615	0.0484093	0.113535
5	GO:0043902	positive regulation of multi-organism process	11.6304	2	0.0384615	0.0484093	0.113535
5	GO:0048339	paraxial mesoderm development	11.6304	2	0.0384615	0.0484093	0.113535
5	GO:0032104	regulation of response to extracellular stimulus	11.2154	2	0.0384615	0.0484093	0.113535
5	GO:0055089	fatty acid homeostasis	11.6304	2	0.0384615	0.0484093	0.113535
5	GO:0090342	regulation of cell aging	11.2154	2	0.0384615	0.0484093	0.113535
5	GO:0071359	cellular response to dsRNA	11.6304	2	0.0384615	0.0484093	0.113535
5	GO:0010165	response to X-ray	11.6304	2	0.0384615	0.0484093	0.113535
5	GO:0002862	negative regulation of inflammatory response to antigenic stimulus	11.6304	2	0.0384615	0.0484093	0.113535
5	GO:0046902	regulation of mitochondrial membrane permeability	11.6304	2	0.0384615	0.0484093	0.113535
5	GO:0060331	negative regulation of response to interferon-gamma	11.6304	2	0.0384615	0.0484093	0.113535
5	GO:0009168	purine ribonucleoside monophosphate biosynthetic process	11.2154	2	0.0384615	0.0484093	0.113535
5	GO:0072087	renal vesicle development	11.2154	2	0.0384615	0.0484093	0.113535
5	GO:0006839	mitochondrial transport	11.6304	2	0.0384615	0.0484093	0.113535
5	GO:2001021	negative regulation of response to DNA damage stimulus	11.6304	2	0.0384615	0.0484093	0.113535
5	GO:0042440	pigment metabolic process	10.6304	2	0.0384615	0.0484093	0.113535
5	GO:0072283	metanephric renal vesicle morphogenesis	11.6304	2	0.0384615	0.0484093	0.113535
5	GO:0000725	recombinational repair	11.6304	2	0.0384615	0.0484093	0.113535
5	GO:0034660	ncRNA metabolic process	11.6304	2	0.0384615	0.0484093	0.113535
5	GO:0000724	double-strand break repair via homologous recombination	11.6304	2	0.0384615	0.0484093	0.113535
5	GO:0045717	negative regulation of fatty acid biosynthetic process	11.6304	2	0.0384615	0.0484093	0.113535
5	GO:0007006	mitochondrial membrane organization	11.6304	2	0.0384615	0.0484093	0.113535
5	GO:0010665	regulation of cardiac muscle cell apoptosis	11.6304	2	0.0384615	0.0484093	0.113535
5	GO:0072088	nephron epithelium morphogenesis	10.8935	2	0.0384615	0.0484093	0.113535
5	GO:0050434	positive regulation of viral transcription	11.6304	2	0.0384615	0.0484093	0.113535
5	GO:0019395	fatty acid oxidation	11.6304	2	0.0384615	0.0484093	0.113535
5	GO:0032753	positive regulation of interleukin-4 production	11.6304	2	0.0384615	0.0484093	0.113535
5	GO:0007622	rhythmic behavior	11.6304	2	0.0384615	0.0484093	0.113535
5	GO:0060336	negative regulation of interferon-gamma-mediated signaling pathway	11.6304	2	0.0384615	0.0484093	0.113535
5	GO:0009127	purine nucleoside monophosphate biosynthetic process	11.2154	2	0.0384615	0.0484093	0.113535
5	GO:0048541	Peyer's patch development	11.6304	2	0.0384615	0.0484093	0.113535
5	GO:0055090	acylglycerol homeostasis	11.6304	2	0.0384615	0.0484093	0.113535
5	GO:0060231	mesenchymal to epithelial transition	11.6304	2	0.0384615	0.0484093	0.113535
5	GO:0070328	triglyceride homeostasis	11.6304	2	0.0384615	0.0484093	0.113535
5	GO:0042451	purine nucleoside biosynthetic process	11.6304	2	0.0384615	0.0484093	0.113535
5	GO:0046886	positive regulation of hormone biosynthetic process	11.6304	2	0.0384615	0.0484093	0.113535
5	GO:0010269	response to selenium ion	11.6304	2	0.0384615	0.0484093	0.113535
5	GO:0010226	response to lithium ion	11.6304	2	0.0384615	0.0484093	0.113535
5	GO:0046686	response to cadmium ion	11.6304	2	0.0384615	0.0484093	0.113535
5	GO:0034440	lipid oxidation	11.6304	2	0.0384615	0.0484093	0.113535
5	GO:0009262	deoxyribonucleotide metabolic process	11.6304	2	0.0384615	0.0484093	0.113535
5	GO:0001676	long-chain fatty acid metabolic process	11.6304	2	0.0384615	0.0484093	0.113535
5	GO:0033233	regulation of protein sumoylation	11.6304	2	0.0384615	0.0484093	0.113535
5	GO:0022410	circadian sleep/wake cycle process	11.6304	2	0.0384615	0.0484093	0.113535
5	GO:0048537	mucosal-associated lymphoid tissue development	11.6304	2	0.0384615	0.0484093	0.113535
5	GO:0046885	regulation of hormone biosynthetic process	11.6304	2	0.0384615	0.0484093	0.113535
5	GO:0048511	rhythmic process	8.17099	8	0.153846	0.0483741	0.113556
5	GO:0043524	negative regulation of neuron apoptosis	9.21538	5	0.0961538	0.048951	0.114279
5	GO:0060560	developmental growth involved in morphogenesis	8.75595	5	0.0961538	0.048951	0.114279
5	GO:0044092	negative regulation of molecular function	7.00593	13	0.25	0.0489961	0.114279
6	GO:0006325	chromatin organization	6.27287	13	0.590909	2.65414e-06	8.89487e-05
6	GO:0051276	chromosome organization	5.85783	13	0.590909	5.80489e-06	0.000155632
6	GO:0042733	embryonic digit morphogenesis	10.408	5	0.227273	7.1819e-06	0.000177595
6	GO:0003401	axis elongation	9.63042	5	0.227273	7.1819e-06	0.000177595
6	GO:2001141	regulation of RNA biosynthetic process	5.21538	18	0.818182	7.38528e-06	0.000179146
6	GO:0006355	regulation of transcription, DNA-dependent	5.24384	18	0.818182	7.38528e-06	0.000179146
6	GO:0051252	regulation of RNA metabolic process	5.20976	18	0.818182	8.3499e-06	0.000195112
6	GO:0051253	negative regulation of RNA metabolic process	7.04546	12	0.545455	1.02807e-05	0.000229694
6	GO:0045892	negative regulation of transcription, DNA-dependent	7.10686	12	0.545455	1.02807e-05	0.000229694
6	GO:0016568	chromatin modification	6.67622	11	0.5	1.33901e-05	0.000275038
6	GO:0010629	negative regulation of gene expression	7.00593	12	0.545455	1.82414e-05	0.000334251
6	GO:0034654	nucleobase-containing compound biosynthetic process	6.51494	14	0.636364	2.16368e-05	0.000372357
6	GO:2000113	negative regulation of cellular macromolecule biosynthetic process	6.94859	12	0.545455	2.1909e-05	0.000374512
6	GO:0019438	aromatic compound biosynthetic process	6.75595	14	0.636364	2.51082e-05	0.00040475
6	GO:0018130	heterocycle biosynthetic process	6.52888	14	0.636364	2.51082e-05	0.00040475
6	GO:0010558	negative regulation of macromolecule biosynthetic process	6.84034	12	0.545455	2.62157e-05	0.000417322
6	GO:0032774	RNA biosynthetic process	6.85783	13	0.590909	2.76207e-05	0.000431594
6	GO:0006351	transcription, DNA-dependent	6.85783	13	0.590909	2.76207e-05	0.000431594
6	GO:0044271	cellular nitrogen compound biosynthetic process	6.43402	14	0.636364	3.35911e-05	0.000500331
6	GO:2000112	regulation of cellular macromolecule biosynthetic process	5.02556	18	0.818182	3.35733e-05	0.000503007
6	GO:0006725	cellular aromatic compound metabolic process	5.94859	17	0.772727	3.51725e-05	0.000517829
6	GO:0071841	cellular component organization or biogenesis at cellular level	4.76005	18	0.818182	3.74609e-05	0.000533033
6	GO:0071842	cellular component organization at cellular level	4.76417	18	0.818182	3.74609e-05	0.000533033
6	GO:0045934	negative regulation of nucleobase-containing compound metabolic process	6.84034	12	0.545455	3.71347e-05	0.000534362
6	GO:0032922	circadian regulation of gene expression	10.8935	4	0.181818	3.78622e-05	0.00053575
6	GO:0060602	branch elongation of an epithelium	10.0455	4	0.181818	3.78622e-05	0.00053575
6	GO:0010467	gene expression	6.48746	14	0.636364	3.87306e-05	0.000545011
6	GO:0070933	histone H4 deacetylation	10.0455	5	0.227273	3.9954e-05	0.000553059
6	GO:0051172	negative regulation of nitrogen compound metabolic process	6.80599	12	0.545455	4.39703e-05	0.000592552
6	GO:0045893	positive regulation of transcription, DNA-dependent	6.84034	13	0.590909	5.12426e-05	0.000652574
6	GO:0034641	cellular nitrogen compound metabolic process	4.67622	17	0.772727	5.54233e-05	0.000688601
6	GO:0051254	positive regulation of RNA metabolic process	6.75595	13	0.590909	5.94264e-05	0.000724206
6	GO:0031327	negative regulation of cellular biosynthetic process	6.63042	12	0.545455	7.16035e-05	0.000852215
6	GO:0070932	histone H3 deacetylation	9.89345	5	0.227273	7.69391e-05	0.000874839
6	GO:0035601	protein deacylation	8.46049	5	0.227273	7.69391e-05	0.000874839
6	GO:0016575	histone deacetylation	8.96745	5	0.227273	7.69391e-05	0.000874839
6	GO:0006476	protein deacetylation	8.46049	5	0.227273	7.69391e-05	0.000874839
6	GO:0016070	RNA metabolic process	6.63042	13	0.590909	7.93546e-05	0.000894319
6	GO:0009890	negative regulation of biosynthetic process	6.57153	12	0.545455	8.37296e-05	0.000935348
6	GO:0006357	regulation of transcription from RNA polymerase II promoter	6.06563	14	0.636364	8.73065e-05	0.000966824
6	GO:0010556	regulation of macromolecule biosynthetic process	4.78493	18	0.818182	9.64553e-05	0.00104988
6	GO:0010468	regulation of gene expression	4.80599	18	0.818182	0.000106685	0.00110458
6	GO:0009798	axis specification	10.0455	4	0.181818	0.000109325	0.00110936
6	GO:0051171	regulation of nitrogen compound metabolic process	4.77659	19	0.863636	0.00011099	0.00112179
6	GO:0060688	regulation of morphogenesis of a branching structure	9.04546	5	0.227273	0.000135809	0.00132025
6	GO:0035113	embryonic appendage morphogenesis	9.04546	5	0.227273	0.000135809	0.00132025
6	GO:0030326	embryonic limb morphogenesis	9.04546	5	0.227273	0.000135809	0.00132025
6	GO:0006139	nucleobase-containing compound metabolic process	4.75595	16	0.727273	0.000157683	0.00149857
6	GO:0006807	nitrogen compound metabolic process	4.61547	17	0.772727	0.000160697	0.00150477
6	GO:0043010	camera-type eye development	8.04546	7	0.318182	0.000173676	0.00159694
6	GO:0046483	heterocycle metabolic process	5.62292	16	0.727273	0.00017544	0.0016016
6	GO:0006996	organelle organization	5.32056	14	0.636364	0.000184474	0.00165442
6	GO:0090304	nucleic acid metabolic process	5.55717	15	0.681818	0.000190254	0.00168256
6	GO:0010557	positive regulation of macromolecule biosynthetic process	5.99621	14	0.636364	0.000207771	0.00181231
6	GO:0050680	negative regulation of epithelial cell proliferation	9.63042	5	0.227273	0.000224147	0.00191578
6	GO:0072091	regulation of stem cell proliferation	9.51494	5	0.227273	0.000224147	0.00191578
6	GO:0035108	limb morphogenesis	8.89345	5	0.227273	0.000224147	0.00191578
6	GO:0035107	appendage morphogenesis	8.89345	5	0.227273	0.000224147	0.00191578
6	GO:0090090	negative regulation of canonical Wnt receptor signaling pathway	10.408	4	0.181818	0.000245515	0.00206379
6	GO:0042475	odontogenesis of dentin-containing tooth	10.408	4	0.181818	0.000245515	0.00206379
6	GO:0030178	negative regulation of Wnt receptor signaling pathway	10.0455	4	0.181818	0.000245515	0.00206379
6	GO:0051148	negative regulation of muscle cell differentiation	10.0455	4	0.181818	0.000245515	0.00206379
6	GO:0010628	positive regulation of gene expression	6.64553	13	0.590909	0.000261995	0.00218788
6	GO:0034645	cellular macromolecule biosynthetic process	6.48746	13	0.590909	0.000261995	0.00218788
6	GO:0016570	histone modification	7.14929	9	0.409091	0.000273031	0.00224325
6	GO:0045944	positive regulation of transcription from RNA polymerase II promoter	7.12792	11	0.5	0.000275193	0.00225375
6	GO:0009059	macromolecule biosynthetic process	6.46049	13	0.590909	0.000296254	0.00239542
6	GO:0001654	eye development	7.92998	7	0.318182	0.000298426	0.00240535
6	GO:0016569	covalent chromatin modification	7.10686	9	0.409091	0.000328147	0.00256377
6	GO:0000122	negative regulation of transcription from RNA polymerase II promoter	7.66079	9	0.409091	0.000328147	0.00256377
6	GO:0019219	regulation of nucleobase-containing compound metabolic process	4.87553	18	0.818182	0.000336288	0.00259553
6	GO:0090092	regulation of transmembrane receptor protein serine/threonine kinase signaling pathway	8.89345	5	0.227273	0.000350663	0.00269017
6	GO:0060173	limb development	8.75595	5	0.227273	0.000350663	0.00269017
6	GO:0048736	appendage development	8.75595	5	0.227273	0.000350663	0.00269017
6	GO:0044249	cellular biosynthetic process	4.49087	15	0.681818	0.000363478	0.00276352
6	GO:0048863	stem cell differentiation	8.82306	6	0.272727	0.000378376	0.00284284
6	GO:0009058	biosynthetic process	4.39201	15	0.681818	0.000446693	0.00326933
6	GO:0002244	hemopoietic progenitor cell differentiation	9.75595	4	0.181818	0.000472589	0.00341956
6	GO:0008589	regulation of smoothened signaling pathway	10.2154	4	0.181818	0.000472589	0.00341956
6	GO:0042476	odontogenesis	10.2154	4	0.181818	0.000472589	0.00341956
6	GO:0045786	negative regulation of cell cycle	8.12792	7	0.318182	0.000487737	0.00350923
6	GO:0051153	regulation of striated muscle cell differentiation	8.82306	5	0.227273	0.000525123	0.00375699
6	GO:0071840	cellular component organization or biogenesis	4.20136	19	0.863636	0.000611413	0.00422024
6	GO:0016043	cellular component organization	4.20415	19	0.863636	0.000611413	0.00422024
6	GO:0060606	tube closure	11.2154	3	0.136364	0.000614076	0.00422717
6	GO:0051150	regulation of smooth muscle cell differentiation	10.408	3	0.136364	0.000614076	0.00422717
6	GO:0009948	anterior/posterior axis specification	10.8935	3	0.136364	0.000614076	0.00422717
6	GO:0045778	positive regulation of ossification	11.2154	3	0.136364	0.000614076	0.00422717
6	GO:0001843	neural tube closure	11.2154	3	0.136364	0.000614076	0.00422717
6	GO:0060442	branching involved in prostate gland morphogenesis	10.8935	3	0.136364	0.000614076	0.00422717
6	GO:0042481	regulation of odontogenesis	11.2154	3	0.136364	0.000614076	0.00422717
6	GO:2000647	negative regulation of stem cell proliferation	11.2154	3	0.136364	0.000614076	0.00422717
6	GO:0031326	regulation of cellular biosynthetic process	4.65314	18	0.818182	0.000625643	0.00427215
6	GO:0048762	mesenchymal cell differentiation	9.12792	5	0.227273	0.000758266	0.00506904
6	GO:0051173	positive regulation of nitrogen compound metabolic process	6.09644	14	0.636364	0.000772809	0.00509934
6	GO:0009889	regulation of biosynthetic process	4.53942	18	0.818182	0.000808026	0.00525011
6	GO:0010605	negative regulation of macromolecule metabolic process	5.96745	12	0.545455	0.00091415	0.00583544
6	GO:0007423	sensory organ development	7.28464	7	0.318182	0.000942737	0.00592877
6	GO:0008285	negative regulation of cell proliferation	7.0861	9	0.409091	0.0010394	0.00637918
6	GO:0060560	developmental growth involved in morphogenesis	8.75595	5	0.227273	0.0010617	0.00648476
6	GO:0001649	osteoblast differentiation	9.89345	4	0.181818	0.0013132	0.00763636
6	GO:0007420	brain development	6.80599	9	0.409091	0.00139199	0.0078962
6	GO:0045935	positive regulation of nucleobase-containing compound metabolic process	6.27287	13	0.590909	0.00139148	0.00791094
6	GO:0060485	mesenchyme development	8.51494	5	0.227273	0.00144779	0.00812227
6	GO:2000027	regulation of organ morphogenesis	7.69182	5	0.227273	0.00144779	0.00812227
6	GO:0030278	regulation of ossification	8.75595	5	0.227273	0.00144779	0.00812227
6	GO:0044253	positive regulation of multicellular organismal metabolic process	10.8935	3	0.136364	0.0014784	0.00822157
6	GO:0009953	dorsal/ventral pattern formation	10.2154	3	0.136364	0.0014784	0.00822157
6	GO:0050672	negative regulation of lymphocyte proliferation	10.8935	3	0.136364	0.0014784	0.00822157
6	GO:0045620	negative regulation of lymphocyte differentiation	10.8935	3	0.136364	0.0014784	0.00822157
6	GO:0014020	primary neural tube formation	10.8935	3	0.136364	0.0014784	0.00822157
6	GO:0032967	positive regulation of collagen biosynthetic process	10.8935	3	0.136364	0.0014784	0.00822157
6	GO:0010714	positive regulation of collagen metabolic process	10.8935	3	0.136364	0.0014784	0.00822157
6	GO:0032945	negative regulation of mononuclear cell proliferation	10.8935	3	0.136364	0.0014784	0.00822157
6	GO:0048565	digestive tract development	8.12792	6	0.272727	0.00179509	0.00958512
6	GO:0048589	developmental growth	8.17099	6	0.272727	0.00179509	0.00958512
6	GO:0009968	negative regulation of signal transduction	6.18196	10	0.454545	0.00183148	0.00971827
6	GO:0006793	phosphorus metabolic process	4.71156	5	0.227273	0.00184008	0.00974362
6	GO:0051147	regulation of muscle cell differentiation	8.26119	5	0.227273	0.00192954	0.0100914
6	GO:0022612	gland morphogenesis	8.17099	5	0.227273	0.00192954	0.0100914
6	GO:0048864	stem cell development	9.04546	5	0.227273	0.00192954	0.0100914
6	GO:0001503	ossification	8.89345	5	0.227273	0.00192954	0.0100914
6	GO:0035148	tube formation	9.75595	4	0.181818	0.001986	0.0103021
6	GO:0071559	response to transforming growth factor beta stimulus	9.75595	4	0.181818	0.001986	0.0103021
6	GO:0071560	cellular response to transforming growth factor beta stimulus	9.75595	4	0.181818	0.001986	0.0103021
6	GO:0021915	neural tube development	9.51494	4	0.181818	0.001986	0.0103021
6	GO:0006796	phosphate-containing compound metabolic process	4.71554	5	0.227273	0.00199277	0.0103162
6	GO:0045165	cell fate commitment	7.69182	6	0.272727	0.00222271	0.011255
6	GO:0001501	skeletal system development	7.78912	6	0.272727	0.00222271	0.011255
6	GO:0048585	negative regulation of response to stimulus	5.65314	11	0.5	0.0023243	0.0116306
6	GO:0021537	telencephalon development	8.51494	5	0.227273	0.00252047	0.0124171
6	GO:0023057	negative regulation of signaling	6.13857	10	0.454545	0.00261151	0.0128408
6	GO:0055123	digestive system development	8.00593	6	0.272727	0.00272426	0.0132671
6	GO:0032965	regulation of collagen biosynthetic process	10.6304	3	0.136364	0.00284747	0.013684
6	GO:0044246	regulation of multicellular organismal metabolic process	10.6304	3	0.136364	0.00284747	0.013684
6	GO:0072089	stem cell proliferation	10.6304	3	0.136364	0.00284747	0.013684
6	GO:0050868	negative regulation of T cell activation	10.2154	3	0.136364	0.00284747	0.013684
6	GO:0030510	regulation of BMP signaling pathway	10.408	3	0.136364	0.00284747	0.013684
6	GO:0060765	regulation of androgen receptor signaling pathway	10.6304	3	0.136364	0.00284747	0.013684
6	GO:0010712	regulation of collagen metabolic process	10.6304	3	0.136364	0.00284747	0.013684
6	GO:0010870	positive regulation of receptor biosynthetic process	10.6304	3	0.136364	0.00284747	0.013684
6	GO:0070664	negative regulation of leukocyte proliferation	10.408	3	0.136364	0.00284747	0.013684
6	GO:0048839	inner ear development	9.30849	4	0.181818	0.00286692	0.0137515
6	GO:0031324	negative regulation of cellular metabolic process	5.79753	12	0.545455	0.00288967	0.0138346
6	GO:0010648	negative regulation of cell communication	6.11735	10	0.454545	0.00292571	0.0139547
6	GO:0016310	phosphorylation	4.836	4	0.181818	0.00309335	0.0145903
6	GO:0061138	morphogenesis of a branching epithelium	7.96745	5	0.227273	0.0032345	0.0150333
6	GO:0016202	regulation of striated muscle tissue development	8.30849	5	0.227273	0.0032345	0.0150333
6	GO:0048634	regulation of muscle organ development	8.21538	5	0.227273	0.0032345	0.0150333
6	GO:0009891	positive regulation of biosynthetic process	5.58602	14	0.636364	0.00337651	0.0154676
6	GO:0009892	negative regulation of metabolic process	5.64553	12	0.545455	0.00383114	0.0169115
6	GO:0043583	ear development	9.04546	4	0.181818	0.00398526	0.0173809
6	GO:0045995	regulation of embryonic development	9.30849	4	0.181818	0.00398526	0.0173809
6	GO:0051250	negative regulation of lymphocyte activation	9.30849	4	0.181818	0.00398526	0.0173809
6	GO:0048641	regulation of skeletal muscle tissue development	8.96745	4	0.181818	0.00398526	0.0173809
6	GO:0010721	negative regulation of cell development	9.40803	4	0.181818	0.00398526	0.0173809
6	GO:0014031	mesenchymal cell development	9.40803	4	0.181818	0.00398526	0.0173809
6	GO:0034613	cellular protein localization	7.72353	6	0.272727	0.00398127	0.0173933
6	GO:0070727	cellular macromolecule localization	7.72353	6	0.272727	0.00398127	0.0173933
6	GO:0051129	negative regulation of cellular component organization	8.0861	6	0.272727	0.00398127	0.0173933
6	GO:0010632	regulation of epithelial cell migration	8.75595	5	0.227273	0.00408581	0.0177284
6	GO:2000241	regulation of reproductive process	8.40803	5	0.227273	0.00408581	0.0177284
6	GO:0001763	morphogenesis of a branching structure	7.75595	5	0.227273	0.00408581	0.0177284
6	GO:0048598	embryonic morphogenesis	6.75595	6	0.272727	0.00475343	0.0200779
6	GO:0045599	negative regulation of fat cell differentiation	10.408	3	0.136364	0.00479894	0.0201698
6	GO:0001837	epithelial to mesenchymal transition	10.408	3	0.136364	0.00479894	0.0201698
6	GO:0003156	regulation of organ formation	9.89345	3	0.136364	0.00479894	0.0201698
6	GO:0001841	neural tube formation	10.408	3	0.136364	0.00479894	0.0201698
6	GO:0033143	regulation of intracellular steroid hormone receptor signaling pathway	10.408	3	0.136364	0.00479894	0.0201698
6	GO:0010869	regulation of receptor biosynthetic process	10.408	3	0.136364	0.00479894	0.0201698
6	GO:0030097	hemopoiesis	6.64553	8	0.363636	0.00500368	0.0208582
6	GO:0050679	positive regulation of epithelial cell proliferation	8.75595	5	0.227273	0.00508871	0.021109
6	GO:0006338	chromatin remodeling	8.75595	5	0.227273	0.00508871	0.021109
6	GO:0007623	circadian rhythm	9.40803	4	0.181818	0.00536932	0.0219161
6	GO:0010634	positive regulation of epithelial cell migration	9.40803	4	0.181818	0.00536932	0.0219161
6	GO:0021953	central nervous system neuron differentiation	9.12792	4	0.181818	0.00536932	0.0219161
6	GO:0045598	regulation of fat cell differentiation	9.40803	4	0.181818	0.00536932	0.0219161
6	GO:0021536	diencephalon development	9.30849	4	0.181818	0.00536932	0.0219161
6	GO:0007417	central nervous system development	6.32056	9	0.409091	0.00551742	0.0224487
6	GO:0051726	regulation of cell cycle	6.14929	10	0.454545	0.00553235	0.0224735
6	GO:0050678	regulation of epithelial cell proliferation	7.92998	6	0.272727	0.00563282	0.0227006
6	GO:0008284	positive regulation of cell proliferation	6.32056	10	0.454545	0.0061097	0.0242389
6	GO:0072001	renal system development	7.57153	5	0.227273	0.00625755	0.0247484
6	GO:0006468	protein phosphorylation	5.09644	4	0.181818	0.00629871	0.0248726
6	GO:0048534	hemopoietic or lymphoid organ development	6.46049	8	0.363636	0.00639151	0.0251222
6	GO:0040007	growth	7.51494	6	0.272727	0.00662822	0.0258531
6	GO:0001657	ureteric bud development	9.12792	4	0.181818	0.00704606	0.0271092
6	GO:0060828	regulation of canonical Wnt receptor signaling pathway	9.21538	4	0.181818	0.00704606	0.0271092
6	GO:0048546	digestive tract morphogenesis	9.04546	4	0.181818	0.00704606	0.0271092
6	GO:0009790	embryo development	5.95799	8	0.363636	0.00718973	0.0275372
6	GO:0080090	regulation of primary metabolic process	3.52189	19	0.863636	0.00729665	0.0277796
6	GO:2000242	negative regulation of reproductive process	10.2154	3	0.136364	0.00739475	0.0280692
6	GO:0090183	regulation of kidney development	9.30849	3	0.136364	0.00739475	0.0280692
6	GO:0048706	embryonic skeletal system development	9.89345	3	0.136364	0.00739475	0.0280692
6	GO:0035282	segmentation	9.89345	3	0.136364	0.00739475	0.0280692
6	GO:0060512	prostate gland morphogenesis	9.89345	3	0.136364	0.00739475	0.0280692
6	GO:0060740	prostate gland epithelium morphogenesis	9.89345	3	0.136364	0.00739475	0.0280692
6	GO:0060443	mammary gland morphogenesis	9.63042	3	0.136364	0.00739475	0.0280692
6	GO:0009799	specification of symmetry	9.89345	3	0.136364	0.00739475	0.0280692
6	GO:0010464	regulation of mesenchymal cell proliferation	9.89345	3	0.136364	0.00739475	0.0280692
6	GO:0051302	regulation of cell division	8.63042	5	0.227273	0.00760655	0.0286596
6	GO:0031328	positive regulation of cellular biosynthetic process	5.77244	13	0.590909	0.00806417	0.0299846
6	GO:0002520	immune system development	6.3952	8	0.363636	0.00806352	0.030026
6	GO:0051093	negative regulation of developmental process	6.27287	9	0.409091	0.00841096	0.030913
6	GO:0060255	regulation of macromolecule metabolic process	3.58057	18	0.818182	0.00880826	0.0321413
6	GO:0061198	fungiform papilla formation	11.6304	2	0.0909091	0.00891156	0.0323791
6	GO:0032784	regulation of transcription elongation, DNA-dependent	11.6304	2	0.0909091	0.00891156	0.0323791
6	GO:0060324	face development	11.6304	2	0.0909091	0.00891156	0.0323791
6	GO:0021532	neural tube patterning	11.6304	2	0.0909091	0.00891156	0.0323791
6	GO:0097094	craniofacial suture morphogenesis	11.6304	2	0.0909091	0.00891156	0.0323791
6	GO:0090178	regulation of establishment of planar polarity involved in neural tube closure	11.6304	2	0.0909091	0.00891156	0.0323791
6	GO:0061029	eyelid development in camera-type eye	11.6304	2	0.0909091	0.00891156	0.0323791
6	GO:0060439	trachea morphogenesis	11.6304	2	0.0909091	0.00891156	0.0323791
6	GO:0090189	regulation of branching involved in ureteric bud morphogenesis	11.2154	2	0.0909091	0.00891156	0.0323791
6	GO:0033083	regulation of immature T cell proliferation	11.6304	2	0.0909091	0.00891156	0.0323791
6	GO:0045581	negative regulation of T cell differentiation	11.6304	2	0.0909091	0.00891156	0.0323791
6	GO:0000083	regulation of transcription involved in G1/S phase of mitotic cell cycle	11.6304	2	0.0909091	0.00891156	0.0323791
6	GO:0060363	cranial suture morphogenesis	11.6304	2	0.0909091	0.00891156	0.0323791
6	GO:0021978	telencephalon regionalization	11.6304	2	0.0909091	0.00891156	0.0323791
6	GO:0045136	development of secondary sexual characteristics	11.6304	2	0.0909091	0.00891156	0.0323791
6	GO:0045662	negative regulation of myoblast differentiation	11.6304	2	0.0909091	0.00891156	0.0323791
6	GO:0021904	dorsal/ventral neural tube patterning	11.6304	2	0.0909091	0.00891156	0.0323791
6	GO:0043587	tongue morphogenesis	11.6304	2	0.0909091	0.00891156	0.0323791
6	GO:0070169	positive regulation of biomineral tissue development	11.6304	2	0.0909091	0.00891156	0.0323791
6	GO:0090175	regulation of establishment of planar polarity	10.2154	2	0.0909091	0.00891156	0.0323791
6	GO:0043030	regulation of macrophage activation	11.6304	2	0.0909091	0.00891156	0.0323791
6	GO:0060026	convergent extension	11.6304	2	0.0909091	0.00891156	0.0323791
6	GO:0060071	Wnt receptor signaling pathway, planar cell polarity pathway	10.2154	2	0.0909091	0.00891156	0.0323791
6	GO:0046543	development of secondary female sexual characteristics	11.6304	2	0.0909091	0.00891156	0.0323791
6	GO:0030501	positive regulation of bone mineralization	11.6304	2	0.0909091	0.00891156	0.0323791
6	GO:0021871	forebrain regionalization	11.6304	2	0.0909091	0.00891156	0.0323791
6	GO:0061197	fungiform papilla morphogenesis	11.6304	2	0.0909091	0.00891156	0.0323791
6	GO:0045880	positive regulation of smoothened signaling pathway	11.6304	2	0.0909091	0.00891156	0.0323791
6	GO:0021772	olfactory bulb development	11.6304	2	0.0909091	0.00891156	0.0323791
6	GO:0033280	response to vitamin D	11.6304	2	0.0909091	0.00891156	0.0323791
6	GO:0035567	non-canonical Wnt receptor signaling pathway	9.89345	2	0.0909091	0.00891156	0.0323791
6	GO:0060744	mammary gland branching involved in thelarche	11.6304	2	0.0909091	0.00891156	0.0323791
6	GO:0061196	fungiform papilla development	11.6304	2	0.0909091	0.00891156	0.0323791
6	GO:0042695	thelarche	11.6304	2	0.0909091	0.00891156	0.0323791
6	GO:0060393	regulation of pathway-restricted SMAD protein phosphorylation	11.6304	2	0.0909091	0.00891156	0.0323791
6	GO:0072074	kidney mesenchyme development	11.6304	2	0.0909091	0.00891156	0.0323791
6	GO:0034243	regulation of transcription elongation from RNA polymerase II promoter	11.6304	2	0.0909091	0.00891156	0.0323791
6	GO:0090179	planar cell polarity pathway involved in neural tube closure	11.6304	2	0.0909091	0.00891156	0.0323791
6	GO:0009952	anterior/posterior pattern specification	8.96745	4	0.181818	0.00904085	0.0326625
6	GO:0051783	regulation of nuclear division	9.04546	4	0.181818	0.00904085	0.0326625
6	GO:0002695	negative regulation of leukocyte activation	9.04546	4	0.181818	0.00904085	0.0326625
6	GO:0061061	muscle structure development	7.63042	6	0.272727	0.00900255	0.0326631
6	GO:0060284	regulation of cell development	6.54296	8	0.363636	0.0090175	0.0326708
6	GO:0048646	anatomical structure formation involved in morphogenesis	6.40803	8	0.363636	0.0090175	0.0326708
6	GO:0031323	regulation of cellular metabolic process	3.47729	19	0.863636	0.00949972	0.0341748
6	GO:0045596	negative regulation of cell differentiation	6.72353	8	0.363636	0.0100564	0.0358735
6	GO:0072175	epithelial tube formation	10.0455	3	0.136364	0.0106828	0.0376856
6	GO:0010830	regulation of myotube differentiation	10.0455	3	0.136364	0.0106828	0.0376856
6	GO:0090101	negative regulation of transmembrane receptor protein serine/threonine kinase signaling pathway	10.0455	3	0.136364	0.0106828	0.0376856
6	GO:0051149	positive regulation of muscle cell differentiation	9.75595	3	0.136364	0.0106828	0.0376856
6	GO:2001014	regulation of skeletal muscle cell differentiation	10.0455	3	0.136364	0.0106828	0.0376856
6	GO:0001838	embryonic epithelial tube formation	10.0455	3	0.136364	0.0106828	0.0376856
6	GO:2000648	positive regulation of stem cell proliferation	10.0455	3	0.136364	0.0106828	0.0376856
6	GO:0060070	canonical Wnt receptor signaling pathway	9.63042	3	0.136364	0.0106828	0.0376856
6	GO:0050673	epithelial cell proliferation	9.89345	3	0.136364	0.0106828	0.0376856
6	GO:2000177	regulation of neural precursor cell proliferation	9.63042	3	0.136364	0.0106828	0.0376856
6	GO:0061053	somite development	9.89345	3	0.136364	0.0106828	0.0376856
6	GO:0035239	tube morphogenesis	7.38249	5	0.227273	0.0109009	0.0381381
6	GO:0060537	muscle tissue development	8.0861	5	0.227273	0.0109009	0.0381381
6	GO:0060562	epithelial tube morphogenesis	7.82306	5	0.227273	0.0109009	0.0381381
6	GO:0050866	negative regulation of cell activation	8.96745	4	0.181818	0.0113772	0.0393184
6	GO:0010948	negative regulation of cell cycle process	8.89345	4	0.181818	0.0113772	0.0393184
6	GO:0030111	regulation of Wnt receptor signaling pathway	8.75595	4	0.181818	0.0113772	0.0393184
6	GO:0048638	regulation of developmental growth	9.12792	4	0.181818	0.0113772	0.0393184
6	GO:0009887	organ morphogenesis	5.85783	7	0.318182	0.0113952	0.0393275
6	GO:0008104	protein localization	7.26119	6	0.272727	0.0119476	0.0406283
6	GO:0042692	muscle cell differentiation	8.04546	5	0.227273	0.0128732	0.0427483
6	GO:0044087	regulation of cellular component biogenesis	7.57153	6	0.272727	0.0136562	0.0444788
6	GO:0048754	branching morphogenesis of a tube	8.46049	4	0.181818	0.0140765	0.0457307
6	GO:0010594	regulation of endothelial cell migration	8.96745	4	0.181818	0.0140765	0.0457307
6	GO:0010769	regulation of cell morphogenesis involved in differentiation	8.69182	4	0.181818	0.0140765	0.0457307
6	GO:0033365	protein localization to organelle	8.46049	4	0.181818	0.0140765	0.0457307
6	GO:0040029	regulation of gene expression, epigenetic	9.04546	3	0.136364	0.0146983	0.0471493
6	GO:0002088	lens development in camera-type eye	9.75595	3	0.136364	0.0146983	0.0471493
6	GO:0048742	regulation of skeletal muscle fiber development	9.30849	3	0.136364	0.0146983	0.0471493
6	GO:0048610	cellular process involved in reproduction	7.57153	5	0.227273	0.0150795	0.0481296
6	GO:0003002	regionalization	7.96745	4	0.181818	0.0171581	0.0531005
6	GO:0061311	cell surface receptor signaling pathway involved in heart development	10.0455	2	0.0909091	0.017209	0.0531935
6	GO:0060428	lung epithelium development	11.2154	2	0.0909091	0.017209	0.0531935
6	GO:0048635	negative regulation of muscle organ development	11.2154	2	0.0909091	0.017209	0.0531935
6	GO:0021988	olfactory lobe development	11.2154	2	0.0909091	0.017209	0.0531935
6	GO:0060789	hair follicle placode formation	11.2154	2	0.0909091	0.017209	0.0531935
6	GO:0060788	ectodermal placode formation	11.2154	2	0.0909091	0.017209	0.0531935
6	GO:0045843	negative regulation of striated muscle tissue development	11.2154	2	0.0909091	0.017209	0.0531935
6	GO:0045661	regulation of myoblast differentiation	11.2154	2	0.0909091	0.017209	0.0531935
6	GO:0002076	osteoblast development	11.2154	2	0.0909091	0.017209	0.0531935
6	GO:2000178	negative regulation of neural precursor cell proliferation	11.2154	2	0.0909091	0.017209	0.0531935
6	GO:0045912	negative regulation of carbohydrate metabolic process	10.8935	2	0.0909091	0.017209	0.0531935
6	GO:0060438	trachea development	11.2154	2	0.0909091	0.017209	0.0531935
6	GO:0060441	epithelial tube branching involved in lung morphogenesis	10.8935	2	0.0909091	0.017209	0.0531935
6	GO:0043586	tongue development	11.2154	2	0.0909091	0.017209	0.0531935
6	GO:0003309	type B pancreatic cell differentiation	11.2154	2	0.0909091	0.017209	0.0531935
6	GO:0010800	positive regulation of peptidyl-threonine phosphorylation	11.2154	2	0.0909091	0.017209	0.0531935
6	GO:0051155	positive regulation of striated muscle cell differentiation	11.2154	2	0.0909091	0.017209	0.0531935
6	GO:0048645	organ formation	10.8935	2	0.0909091	0.017209	0.0531935
6	GO:0021983	pituitary gland development	11.2154	2	0.0909091	0.017209	0.0531935
6	GO:0003323	type B pancreatic cell development	11.2154	2	0.0909091	0.017209	0.0531935
6	GO:0060322	head development	11.2154	2	0.0909091	0.017209	0.0531935
6	GO:0002068	glandular epithelial cell development	11.2154	2	0.0909091	0.017209	0.0531935
6	GO:0030514	negative regulation of BMP signaling pathway	11.2154	2	0.0909091	0.017209	0.0531935
6	GO:0060425	lung morphogenesis	10.2154	2	0.0909091	0.017209	0.0531935
6	GO:0035019	somatic stem cell maintenance	11.2154	2	0.0909091	0.017209	0.0531935
6	GO:0060444	branching involved in mammary gland duct morphogenesis	10.408	2	0.0909091	0.017209	0.0531935
6	GO:0060840	artery development	11.2154	2	0.0909091	0.017209	0.0531935
6	GO:0060766	negative regulation of androgen receptor signaling pathway	11.2154	2	0.0909091	0.017209	0.0531935
6	GO:0071697	ectodermal placode morphogenesis	11.2154	2	0.0909091	0.017209	0.0531935
6	GO:0035883	enteroendocrine cell differentiation	11.2154	2	0.0909091	0.017209	0.0531935
6	GO:0071696	ectodermal placode development	11.2154	2	0.0909091	0.017209	0.0531935
6	GO:0048714	positive regulation of oligodendrocyte differentiation	11.2154	2	0.0909091	0.017209	0.0531935
6	GO:0010463	mesenchymal cell proliferation	10.6304	2	0.0909091	0.017209	0.0531935
6	GO:0033081	regulation of T cell differentiation in thymus	10.6304	2	0.0909091	0.017209	0.0531935
6	GO:0060684	epithelial-mesenchymal cell signaling	11.2154	2	0.0909091	0.017209	0.0531935
6	GO:0060687	regulation of branching involved in prostate gland morphogenesis	11.2154	2	0.0909091	0.017209	0.0531935
6	GO:0033144	negative regulation of intracellular steroid hormone receptor signaling pathway	11.2154	2	0.0909091	0.017209	0.0531935
6	GO:0090311	regulation of protein deacetylation	11.2154	2	0.0909091	0.017209	0.0531935
6	GO:0030900	forebrain development	7.28464	6	0.272727	0.0175888	0.0539092
[truncated: 166 more rows]
