# Supplementary material for: An integrative machine learning approach for prediction of toxicity-related drug safety
Source: Life Sci Alliance. 2018 Nov 28;1(6):e201800098. doi: 10.26508/lsa.201800098 (PMC6262234; doi:10.26508/lsa.201800098)
Supplement: Supplementary file 2 [file LSA-2018-00098_TableS2.xlsx]

## Sheet: Sheet1
Symbol	Ensembl Gene	Druggability tier	STRING	Score(higher = greater toxicity potential)	Cluster number (for top 10%)
FGFR2	ENSG00000066468	Tier 1	9606.ENSP00000410294	1.76455	1
JAK2	ENSG00000096968	Tier 1	9606.ENSP00000371067	1.68133	1
TLR4	ENSG00000136869	Tier 2	9606.ENSP00000363089	1.56391	2
KIT	ENSG00000157404	Tier 1	9606.ENSP00000288135	1.56176	1
CDK5	ENSG00000164885	Tier 1	9606.ENSP00000419782	1.44273	2
LYN	ENSG00000254087	Tier 1	9606.ENSP00000428924	1.39218	1
NFKBIA	ENSG00000100906	Tier 2	9606.ENSP00000216797	1.3815	2
TLR2	ENSG00000137462	Tier 3B	9606.ENSP00000260010	1.34914	2
AKT1	ENSG00000142208	Tier 1	9606.ENSP00000270202	1.34773	2
NFKB1	ENSG00000109320	Tier 1	9606.ENSP00000226574	1.33854	2
PDGFRB	ENSG00000113721	Tier 1	9606.ENSP00000261799	1.26234	1
MTOR	ENSG00000198793	Tier 1	9606.ENSP00000354558	1.12721	2
PIK3CG	ENSG00000105851	Tier 1	9606.ENSP00000352121	1.0251	2
CDK1	ENSG00000170312	Tier 1	9606.ENSP00000378699	1.02142	2
NOTCH1	ENSG00000148400	Tier 1	9606.ENSP00000277541	1.00415	2
BCL2	ENSG00000171791	Tier 1	9606.ENSP00000329623	1.00332	2
PIK3CD	ENSG00000171608	Tier 1	9606.ENSP00000366563	0.998733	2
CALM3	ENSG00000160014	Tier 2	9606.ENSP00000291295	0.928027	2
SYK	ENSG00000165025	Tier 1	9606.ENSP00000364898	0.874673	1
FGFR1	ENSG00000077782	Tier 1	9606.ENSP00000393312	0.829493	1
PIK3CA	ENSG00000121879	Tier 1	9606.ENSP00000263967	0.788023	2
ILK	ENSG00000166333	Tier 3B	9606.ENSP00000299421	0.777831	2
RIPK2	ENSG00000104312	Tier 1	9606.ENSP00000220751	0.749074	3
PIK3CB	ENSG00000051382	Tier 1	9606.ENSP00000289153	0.736666	2
RET	ENSG00000165731	Tier 1	9606.ENSP00000347942	0.730447	1
MAP3K7	ENSG00000135341	Tier 1	9606.ENSP00000358335	0.725207	1
RIPK1	ENSG00000137275	Tier 1	9606.ENSP00000259808	0.723422	1
IGF1R	ENSG00000140443	Tier 1	9606.ENSP00000268035	0.72041	1
FGFR3	ENSG00000068078	Tier 1	9606.ENSP00000339824	0.711285	1
IRAK1	ENSG00000184216	Tier 1	9606.ENSP00000358997	0.705117	1
CALM1	ENSG00000198668	Tier 2	9606.ENSP00000349467	0.687049	2
CALM2	ENSG00000143933	Tier 2	9606.ENSP00000272298	0.680292	2
PDGFRA	ENSG00000134853	Tier 1	9606.ENSP00000257290	0.678136	1
CDC42	ENSG00000070831	Tier 2	9606.ENSP00000314458	0.667044	2
TNNC1	ENSG00000114854	Tier 2	9606.ENSP00000232975	0.664895	4
TEK	ENSG00000120156	Tier 1	9606.ENSP00000369375	0.617537	1
KDR	ENSG00000128052	Tier 1	9606.ENSP00000263923	0.587846	1
HIF1A	ENSG00000100644	Tier 1	9606.ENSP00000338018	0.569143	5
LCK	ENSG00000182866	Tier 1	9606.ENSP00000337825	0.549033	1
SCGN	ENSG00000079689	Tier 3A	9606.ENSP00000367197	0.537335	4
OXTR	ENSG00000180914	Tier 1	9606.ENSP00000324270	0.531067	4
PRKCA	ENSG00000154229	Tier 1	9606.ENSP00000408695	0.518101	2
PRKDC	ENSG00000253729	Tier 2	9606.ENSP00000313420	0.515631	2
EPHA2	ENSG00000142627	Tier 1	9606.ENSP00000351209	0.49694	1
ABL1	ENSG00000097007	Tier 1	9606.ENSP00000361423	0.49587	1
TLR3	ENSG00000164342	Tier 3B	9606.ENSP00000296795	0.456963	2
PRKAA1	ENSG00000132356	Tier 1	9606.ENSP00000346148	0.446617	2
RPS6KB1	ENSG00000108443	Tier 1	9606.ENSP00000225577	0.435385	2
RPS6KA3	ENSG00000177189	Tier 1	9606.ENSP00000368884	0.412252	2
CNR1	ENSG00000118432	Tier 1	9606.ENSP00000358511	0.410418	4
INSR	ENSG00000171105	Tier 1	9606.ENSP00000303830	0.39646	1
PIK3C2A	ENSG00000011405	Tier 2	9606.ENSP00000265970	0.364449	2
SMAD3	ENSG00000166949	Tier 2	9606.ENSP00000332973	0.33551	5
NR1I2	ENSG00000144852	Tier 1	9606.ENSP00000336528	0.333734	5
PIK3C3	ENSG00000078142	Tier 2	9606.ENSP00000262039	0.331054	2
NOD2	ENSG00000167207	Tier 2	9606.ENSP00000300589	0.330701	5
PRKCE	ENSG00000171132	Tier 1	9606.ENSP00000306124	0.328976	2
FYN	ENSG00000010810	Tier 1	9606.ENSP00000346671	0.320313	2
TLR9	ENSG00000239732	Tier 1	9606.ENSP00000353874	0.309422	2
HSP90AB1	ENSG00000096384	Tier 1	9606.ENSP00000325875	0.309126	2
CDK6	ENSG00000105810	Tier 1	9606.ENSP00000265734	0.300238	2
TGFB1	ENSG00000105329	Tier 1	9606.ENSP00000221930	0.283322	6
EDNRB	ENSG00000136160	Tier 1	9606.ENSP00000366416	0.270009	4
MDM2	ENSG00000135679	Tier 1	9606.ENSP00000417281	0.269405	5
CDK4	ENSG00000135446	Tier 1	9606.ENSP00000257904	0.263117	2
ZAP70	ENSG00000115085	Tier 1	9606.ENSP00000264972	0.250494	1
MAP2K1	ENSG00000169032	Tier 1	9606.ENSP00000302486	0.2465	2
SMG1	ENSG00000157106	Tier 2	9606.ENSP00000402515	0.242871	2
PLK1	ENSG00000166851	Tier 1	9606.ENSP00000300093	0.234578	2
SFN	ENSG00000175793	Tier 3B	9606.ENSP00000340989	0.225634	2
JAK3	ENSG00000105639	Tier 1	9606.ENSP00000391676	0.22222	1
CDK16	ENSG00000102225	Tier 1	9606.ENSP00000276052	0.21759	2
PRKCD	ENSG00000163932	Tier 1	9606.ENSP00000331602	0.211142	2
ERN1	ENSG00000178607	Tier 1	9606.ENSP00000401445	0.206834	1
NOTCH3	ENSG00000074181	Tier 3B	9606.ENSP00000263388	0.196899	2
SHH	ENSG00000164690	Tier 1	9606.ENSP00000297261	0.1927	6
WNT5A	ENSG00000114251	Tier 3A	9606.ENSP00000264634	0.189395	6
TYRO3	ENSG00000092445	Tier 1	9606.ENSP00000263798	0.187866	1
PTGS2	ENSG00000073756	Tier 1	9606.ENSP00000356438	0.18329	5
NR1H3	ENSG00000025434	Tier 2	9606.ENSP00000387946	0.182966	5
TP53	ENSG00000141510	Tier 1	9606.ENSP00000269305	0.18231	5
AXL	ENSG00000167601	Tier 1	9606.ENSP00000301178	0.169428	3
RPS6KA5	ENSG00000100784	Tier 1	9606.ENSP00000261991	0.166975	2
YWHAG	ENSG00000170027	Tier 2	9606.ENSP00000306330	0.164169	2
PPARG	ENSG00000132170	Tier 1	9606.ENSP00000287820	0.159716	5
BMP4	ENSG00000125378	Tier 2	9606.ENSP00000245451	0.157159	6
BRCA1	ENSG00000012048	Tier 2	9606.ENSP00000418960	0.145066	5
RXRA	ENSG00000186350	Tier 1	9606.ENSP00000419692	0.139874	5
NOTCH4	ENSG00000204301	Tier 3A	9606.ENSP00000364163	0.138853	2
CACNA2D1	ENSG00000153956	Tier 1	9606.ENSP00000349320	0.138382	4
PLA2G6	ENSG00000184381	Tier 2	9606.ENSP00000333142	0.136772	2
MAOB	ENSG00000069535	Tier 1	9606.ENSP00000367309	0.127675	6
MET	ENSG00000105976	Tier 1	9606.ENSP00000317272	0.127082	1
SIRT1	ENSG00000096717	Tier 1	9606.ENSP00000212015	0.12374	5
CSF1R	ENSG00000182578	Tier 1	9606.ENSP00000286301	0.122836	1
CYP19A1	ENSG00000137869	Tier 1	9606.ENSP00000260433	0.121948	5
HTT	ENSG00000197386	Tier 1	9606.ENSP00000347184	0.12038	5
JAK1	ENSG00000162434	Tier 1	9606.ENSP00000343204	0.11535	1
GSTP1	ENSG00000084207	Tier 1	9606.ENSP00000381607	0.103048	5
EDNRA	ENSG00000151617	Tier 1	9606.ENSP00000315011	0.0934001	4
PPARD	ENSG00000112033	Tier 1	9606.ENSP00000310928	0.0771924	5
APOE	ENSG00000130203	Tier 3A	9606.ENSP00000252486	0.0763534	5
ADA	ENSG00000196839	Tier 1	9606.ENSP00000361965	0.068017	5
SFRP1	ENSG00000104332	Tier 2	9606.ENSP00000220772	0.0476534	6
CDK2	ENSG00000123374	Tier 1	9606.ENSP00000266970	0.0409661	2
ABCA1	ENSG00000165029	Tier 1	9606.ENSP00000363868	0.0394311	5
CDK3	ENSG00000250506	Tier 2	9606.ENSP00000400088	0.0393314	2
FGF10	ENSG00000070193	Tier 3A	9606.ENSP00000264664	0.0364848	2
DUSP3	ENSG00000108861	Tier 2	9606.ENSP00000226004	0.0339591	2
FLT1	ENSG00000102755	Tier 1	9606.ENSP00000282397	0.0329831	1
GSK3A	ENSG00000105723	Tier 1	9606.ENSP00000222330	0.0298396	7
RRM1	ENSG00000167325	Tier 1	9606.ENSP00000300738	0.0252738	5
FLT3	ENSG00000122025	Tier 1	9606.ENSP00000241453	0.0228267	1
RORA	ENSG00000069667	Tier 3A	9606.ENSP00000261523	0.022703	6
RPS6KA2	ENSG00000071242	Tier 1	9606.ENSP00000427015	0.0170276	2
CDK7	ENSG00000134058	Tier 1	9606.ENSP00000256443	0.0168372	5
CDK14	ENSG00000058091	Tier 2	9606.ENSP00000265741	0.00230184	2
PRKAA2	ENSG00000162409	Tier 1	9606.ENSP00000360290	-5.56152e-05	2
STK11	ENSG00000118046	Tier 1	9606.ENSP00000324856	-0.000539579	7
EPHB2	ENSG00000133216	Tier 1	9606.ENSP00000363763	-0.00890189	1
YES1	ENSG00000176105	Tier 1	9606.ENSP00000324740	-0.00965444	1
NR1I3	ENSG00000143257	Tier 1	9606.ENSP00000356958	-0.0108347	5
PRKCB	ENSG00000166501	Tier 1	9606.ENSP00000305355	-0.0120216	2
SMO	ENSG00000128602	Tier 1	9606.ENSP00000249373	-0.0130955	5
PDPK1	ENSG00000140992	Tier 1	9606.ENSP00000344220	-0.0191706	2
ATR	ENSG00000175054	Tier 2	9606.ENSP00000343741	-0.0270211	2
MAP2K2	ENSG00000126934	Tier 1	9606.ENSP00000262948	-0.029055	2
CPT1A	ENSG00000110090	Tier 2	9606.ENSP00000265641	-0.0340852	5
HCK	ENSG00000101336	Tier 1	9606.ENSP00000365012	-0.0360243	1
MAP3K1	ENSG00000095015	Tier 2	9606.ENSP00000382423	-0.0386155	2
PIK3C2B	ENSG00000133056	Tier 2	9606.ENSP00000356155	-0.0418401	2
BMP2	ENSG00000125845	Tier 3A	9606.ENSP00000368104	-0.0422556	6
NR1H4	ENSG00000012504	Tier 1	9606.ENSP00000447149	-0.0441297	4
RARA	ENSG00000131759	Tier 1	9606.ENSP00000254066	-0.0467239	5
TIE1	ENSG00000066056	Tier 1	9606.ENSP00000361554	-0.0473592	1
NPM1	ENSG00000181163	Tier 2	9606.ENSP00000296930	-0.048791	5
HRAS	ENSG00000174775	Tier 1	9606.ENSP00000309845	-0.0516454	2
WNT4	ENSG00000162552	Tier 3A	9606.ENSP00000290167	-0.0592021	6
PIK3C2G	ENSG00000139144	Tier 2	9606.ENSP00000266497	-0.0663046	2
BTK	ENSG00000010671	Tier 1	9606.ENSP00000308176	-0.0680495	1
JUN	ENSG00000177606	Tier 2	9606.ENSP00000360266	-0.0737058	5
ABCG1	ENSG00000160179	Tier 1	9606.ENSP00000354995	-0.0961299	5
TUBB1	ENSG00000101162	Tier 1	9606.ENSP00000217133	-0.099183	8
MAOA	ENSG00000189221	Tier 1	9606.ENSP00000340684	-0.099542	6
PPARA	ENSG00000186951	Tier 1	9606.ENSP00000262735	-0.106484	5
KDM1B	ENSG00000165097	Tier 3B	9606.ENSP00000297792	-0.107616	6
RPS6KA1	ENSG00000117676	Tier 1	9606.ENSP00000435412	-0.107622	2
MAP3K2	ENSG00000169967	Tier 1	9606.ENSP00000343463	-0.11271	2
EPHA4	ENSG00000116106	Tier 1	9606.ENSP00000281821	-0.116387	4
EPHA1	ENSG00000146904	Tier 1	9606.ENSP00000275815	-0.122816	1
ITK	ENSG00000113263	Tier 1	9606.ENSP00000398655	-0.124875	1
HDAC1	ENSG00000116478	Tier 1	9606.ENSP00000362649	-0.127426	6
CDK17	ENSG00000059758	Tier 2	9606.ENSP00000261211	-0.130695	2
SIRT2	ENSG00000068903	Tier 2	9606.ENSP00000249396	-0.135482	5
PTPN2	ENSG00000175354	Tier 2	9606.ENSP00000311857	-0.140859	2
RELA	ENSG00000173039	Tier 2	9606.ENSP00000384273	-0.150538	5
TNKS2	ENSG00000107854	Tier 1	9606.ENSP00000360689	-0.155309	2
CDK18	ENSG00000117266	Tier 2	9606.ENSP00000423665	-0.157677	2
TUBB4A	ENSG00000104833	Tier 1	9606.ENSP00000264071	-0.162176	8
TYK2	ENSG00000105397	Tier 1	9606.ENSP00000264818	-0.16274	1
IL6	ENSG00000136244	Tier 1	9606.ENSP00000258743	-0.16354	5
ERCC5	ENSG00000134899	Tier 2	9606.ENSP00000347978	-0.164897	5
TLR1	ENSG00000174125	Tier 3B	9606.ENSP00000354932	-0.16658	2
PBK	ENSG00000168078	Tier 2	9606.ENSP00000301905	-0.16982	1
TOP1	ENSG00000198900	Tier 1	9606.ENSP00000354522	-0.170847	5
CDK15	ENSG00000138395	Tier 2	9606.ENSP00000260967	-0.170959	2
EIF2AK3	ENSG00000172071	Tier 2	9606.ENSP00000307235	-0.177057	5
PPM1B	ENSG00000138032	Tier 2	9606.ENSP00000282412	-0.178002	2
ADIPOQ	ENSG00000181092	Tier 3A	9606.ENSP00000320709	-0.178666	6
EPHA3	ENSG00000044524	Tier 1	9606.ENSP00000337451	-0.17892	1
WEE1	ENSG00000166483	Tier 2	9606.ENSP00000402084	-0.180254	2
FGR	ENSG00000000938	Tier 1	9606.ENSP00000363115	-0.180505	1
MLYCD	ENSG00000103150	Tier 2	9606.ENSP00000262430	-0.184731	5
NOTCH2	ENSG00000134250	Tier 3A	9606.ENSP00000256646	-0.185224	2
FGFR4	ENSG00000160867	Tier 1	9606.ENSP00000292408	-0.189026	1
LEP	ENSG00000174697	Tier 3B	9606.ENSP00000312652	-0.190467	5
TUBA4A	ENSG00000127824	Tier 3B	9606.ENSP00000248437	-0.191106	8
IFNG	ENSG00000111537	Tier 1	9606.ENSP00000229135	-0.192022	6
EPHB4	ENSG00000196411	Tier 1	9606.ENSP00000350896	-0.194814	3
HSP90AA1	ENSG00000080824	Tier 1	9606.ENSP00000335153	-0.195017	2
PRKCG	ENSG00000126583	Tier 1	9606.ENSP00000263431	-0.198347	2
TGFB2	ENSG00000092969	Tier 1	9606.ENSP00000355896	-0.202645	6
GABRB3	ENSG00000166206	Tier 1	9606.ENSP00000299267	-0.20482	4
SLIT2	ENSG00000145147	Tier 3A	9606.ENSP00000422591	-0.205477	2
ARNT	ENSG00000143437	Tier 1	9606.ENSP00000351407	-0.213325	5
TNKS	ENSG00000173273	Tier 2	9606.ENSP00000311579	-0.216577	2
TUBE1	ENSG00000074935	Tier 3B	9606.ENSP00000357651	-0.217831	8
PKMYT1	ENSG00000127564	Tier 2	9606.ENSP00000262300	-0.221586	2
HDAC2	ENSG00000196591	Tier 1	9606.ENSP00000430432	-0.221738	6
NR2E1	ENSG00000112333	Tier 3B	9606.ENSP00000357982	-0.222162	6
MARK2	ENSG00000072518	Tier 1	9606.ENSP00000385751	-0.225148	2
TRIB3	ENSG00000101255	Tier 3B	9606.ENSP00000217233	-0.226526	7
PTK7	ENSG00000112655	Tier 3B	9606.ENSP00000230419	-0.232127	3
AKT2	ENSG00000105221	Tier 1	9606.ENSP00000375892	-0.233317	2
FGF8	ENSG00000107831	Tier 3B	9606.ENSP00000321797	-0.235047	2
RARG	ENSG00000172819	Tier 1	9606.ENSP00000377947	-0.23825	5
NCOA3	ENSG00000124151	Tier 2	9606.ENSP00000361066	-0.240824	5
EPHB1	ENSG00000154928	Tier 1	9606.ENSP00000381097	-0.242474	1
SNCA	ENSG00000145335	Tier 2	9606.ENSP00000338345	-0.243808	5
METAP2	ENSG00000111142	Tier 1	9606.ENSP00000325312	-0.243993	5
INSRR	ENSG00000027644	Tier 2	9606.ENSP00000357178	-0.246092	1
FEN1	ENSG00000168496	Tier 2	9606.ENSP00000305480	-0.247369	5
TUBB2A	ENSG00000137267	Tier 1	9606.ENSP00000369703	-0.250096	8
SIK1	ENSG00000142178	Tier 1	9606.ENSP00000270162	-0.252594	2
SGK1	ENSG00000118515	Tier 2	9606.ENSP00000356832	-0.252647	2
PKN3	ENSG00000160447	Tier 3B	9606.ENSP00000291906	-0.253039	2
SOD2	ENSG00000112096	Tier 1	9606.ENSP00000356022	-0.253066	5
IRAK4	ENSG00000198001	Tier 1	9606.ENSP00000390651	-0.255554	1
BRSK2	ENSG00000174672	Tier 1	9606.ENSP00000310697	-0.256064	2
TDO2	ENSG00000151790	Tier 2	9606.ENSP00000444788	-0.257556	5
TUBB6	ENSG00000176014	Tier 1	9606.ENSP00000318697	-0.257735	8
HDAC6	ENSG00000094631	Tier 1	9606.ENSP00000334061	-0.260866	6
ADH5	ENSG00000197894	Tier 1	9606.ENSP00000296412	-0.265306	5
PSMB2	ENSG00000126067	Tier 1	9606.ENSP00000362334	-0.265603	5
PSMB10	ENSG00000205220	Tier 3B	9606.ENSP00000351314	-0.265623	5
CHRNA7	ENSG00000175344	Tier 1	9606.ENSP00000407546	-0.268412	5
MAP3K3	ENSG00000198909	Tier 1	9606.ENSP00000354927	-0.271331	2
PRKCQ	ENSG00000065675	Tier 1	9606.ENSP00000263125	-0.272105	2
PSMD14	ENSG00000115233	Tier 2	9606.ENSP00000386541	-0.274301	5
BRSK1	ENSG00000160469	Tier 1	9606.ENSP00000310649	-0.275153	2
RORC	ENSG00000143365	Tier 1	9606.ENSP00000327025	-0.278037	5
TUBA3D	ENSG00000075886	Tier 3B	9606.ENSP00000326042	-0.281379	4
TXK	ENSG00000074966	Tier 1	9606.ENSP00000264316	-0.283313	1
FLT4	ENSG00000037280	Tier 1	9606.ENSP00000261937	-0.283384	1
DCK	ENSG00000156136	Tier 2	9606.ENSP00000286648	-0.285776	5
HSP90B1	ENSG00000166598	Tier 2	9606.ENSP00000299767	-0.285992	2
BMP7	ENSG00000101144	Tier 3B	9606.ENSP00000379204	-0.287511	6
TUBB3	ENSG00000198211	Tier 2	9606.ENSP00000451560	-0.287578	8
RB1	ENSG00000139687	Tier 2	9606.ENSP00000267163	-0.288183	6
TUBA1C	ENSG00000167553	Tier 3B	9606.ENSP00000301072	-0.288652	8
MARK1	ENSG00000116141	Tier 1	9606.ENSP00000355884	-0.289688	2
HMGCR	ENSG00000113161	Tier 1	9606.ENSP00000287936	-0.289956	5
BRD3	ENSG00000169925	Tier 2	9606.ENSP00000305918	-0.290073	6
MATK	ENSG00000007264	Tier 1	9606.ENSP00000378485	-0.290182	1
NR5A1	ENSG00000136931	Tier 2	9606.ENSP00000362690	-0.293463	5
HIST1H1E	ENSG00000168298	Tier 1	9606.ENSP00000307705	-0.295422	6
WEE2	ENSG00000214102	Tier 1	9606.ENSP00000380675	-0.295526	2
SGK3	ENSG00000104205	Tier 1	9606.ENSP00000262211	-0.296838	2
C8orf44-SGK3	ENSG00000270024	Tier 1	9606.ENSP00000262211	-0.296838	2
FGF12	ENSG00000114279	Tier 3A	9606.ENSP00000413496	-0.297165	2
PKN1	ENSG00000123143	Tier 1	9606.ENSP00000343325	-0.300072	2
PIM1	ENSG00000137193	Tier 1	9606.ENSP00000362608	-0.300287	7
ATM	ENSG00000149311	Tier 2	9606.ENSP00000278616	-0.300762	5
MARK3	ENSG00000075413	Tier 1	9606.ENSP00000411397	-0.302658	2
RIPK3	ENSG00000129465	Tier 3B	9606.ENSP00000216274	-0.304399	3
TUBB4B	ENSG00000188229	Tier 1	9606.ENSP00000341289	-0.305105	8
ANXA1	ENSG00000135046	Tier 3A	9606.ENSP00000257497	-0.314477	5
CARM1	ENSG00000142453	Tier 2	9606.ENSP00000325690	-0.316113	5
DGAT1	ENSG00000185000	Tier 2	9606.ENSP00000332258	-0.319923	6
NTSR1	ENSG00000101188	Tier 1	9606.ENSP00000359532	-0.32052	4
PRKCH	ENSG00000027075	Tier 1	9606.ENSP00000329127	-0.323074	2
EPHA8	ENSG00000070886	Tier 1	9606.ENSP00000166244	-0.323399	1
PPP5C	ENSG00000011485	Tier 2	9606.ENSP00000012443	-0.32515	2
PAK2	ENSG00000180370	Tier 1	9606.ENSP00000314067	-0.327202	2
TLR6	ENSG00000174130	Tier 3B	9606.ENSP00000371376	-0.327658	2
MELK	ENSG00000165304	Tier 1	9606.ENSP00000298048	-0.327867	7
FGF21	ENSG00000105550	Tier 3A	9606.ENSP00000222157	-0.328497	2
TUBA3C	ENSG00000198033	Tier 3B	9606.ENSP00000382982	-0.334271	8
EIF2AK2	ENSG00000055332	Tier 2	9606.ENSP00000233057	-0.336634	5
SOAT1	ENSG00000057252	Tier 2	9606.ENSP00000356591	-0.338937	6
PIN1	ENSG00000127445	Tier 2	9606.ENSP00000247970	-0.339296	5
POLD1	ENSG00000062822	Tier 1	9606.ENSP00000406046	-0.340025	5
KDM1A	ENSG00000004487	Tier 2	9606.ENSP00000383042	-0.347806	6
TUBG1	ENSG00000131462	Tier 3B	9606.ENSP00000251413	-0.348436	8
PSMB1	ENSG00000008018	Tier 1	9606.ENSP00000262193	-0.350866	5
EPO	ENSG00000130427	Tier 3A	9606.ENSP00000252723	-0.351125	6
NR4A2	ENSG00000153234	Tier 2	9606.ENSP00000344479	-0.35269	5
TRAP1	ENSG00000126602	Tier 2	9606.ENSP00000246957	-0.355647	2
GPX1	ENSG00000233276	Tier 1	9606.ENSP00000407375	-0.357197	5
SIK2	ENSG00000170145	Tier 1	9606.ENSP00000305976	-0.358481	2
CLUL1	ENSG00000079101	Tier 3B	9606.ENSP00000341128	-0.358573	6
GABRA1	ENSG00000022355	Tier 1	9606.ENSP00000023897	-0.35943	4
CCR2	ENSG00000121807	Tier 1	9606.ENSP00000292301	-0.359723	4
TUBB2B	ENSG00000137285	Tier 1	9606.ENSP00000259818	-0.361147	8
MUSK	ENSG00000030304	Tier 1	9606.ENSP00000363571	-0.361879	3
HMGB2	ENSG00000164104	Tier 3B	9606.ENSP00000296503	-0.362171	5
AKT3	ENSG00000117020	Tier 1	9606.ENSP00000263826	-0.364999	2
WNT7B	ENSG00000188064	Tier 3A	9606.ENSP00000341032	-0.36503	6
PCYOX1	ENSG00000116005	Tier 3B	9606.ENSP00000387654	-0.365897	5
IRAK3	ENSG00000090376	Tier 1	9606.ENSP00000261233	-0.367364	1
EFNA1	ENSG00000169242	Tier 3A	9606.ENSP00000357392	-0.368317	2
DCLK1	ENSG00000133083	Tier 1	9606.ENSP00000255448	-0.369761	2
NR1D1	ENSG00000126368	Tier 2	9606.ENSP00000246672	-0.372229	5
BCL2L1	ENSG00000171552	Tier 1	9606.ENSP00000302564	-0.372789	2
BGLAP	ENSG00000242252	Tier 3B	9606.ENSP00000357255	-0.373624	6
TUBB	ENSG00000196230	Tier 1	9606.ENSP00000339001	-0.374648	8
STK4	ENSG00000101109	Tier 1	9606.ENSP00000361892	-0.377638	2
EPHB3	ENSG00000182580	Tier 1	9606.ENSP00000332118	-0.379537	3
NTRK1	ENSG00000198400	Tier 1	9606.ENSP00000431418	-0.380288	5
PIM3	ENSG00000198355	Tier 1	9606.ENSP00000353824	-0.380523	7
CACNB3	ENSG00000167535	Tier 3A	9606.ENSP00000301050	-0.381692	4
NR0B2	ENSG00000131910	Tier 3B	9606.ENSP00000254227	-0.383095	5
MARK4	ENSG00000007047	Tier 1	9606.ENSP00000262891	-0.383485	2
CD86	ENSG00000114013	Tier 1	9606.ENSP00000332049	-0.38455	5
MYLK3	ENSG00000140795	Tier 1	9606.ENSP00000378288	-0.384719	2
NENF	ENSG00000117691	Tier 3B	9606.ENSP00000355955	-0.384992	5
AHR	ENSG00000106546	Tier 1	9606.ENSP00000242057	-0.386094	5
FGFRL1	ENSG00000127418	Tier 3A	9606.ENSP00000264748	-0.388629	3
BMX	ENSG00000102010	Tier 1	9606.ENSP00000308774	-0.388902	3
MIF	ENSG00000240972	Tier 2	9606.ENSP00000215754	-0.389696	5
HDAC4	ENSG00000068024	Tier 1	9606.ENSP00000264606	-0.391897	6
PIM2	ENSG00000102096	Tier 1	9606.ENSP00000365692	-0.39271	7
RRM2B	ENSG00000048392	Tier 3B	9606.ENSP00000251810	-0.393831	5
PTPRJ	ENSG00000149177	Tier 3A	9606.ENSP00000400010	-0.394067	2
MGMT	ENSG00000170430	Tier 1	9606.ENSP00000302111	-0.39451	5
LIMK1	ENSG00000106683	Tier 2	9606.ENSP00000336740	-0.3947	1
BRD4	ENSG00000141867	Tier 2	9606.ENSP00000263377	-0.396483	6
ALB	ENSG00000163631	Tier 2	9606.ENSP00000295897	-0.397692	5
EPHA5	ENSG00000145242	Tier 1	9606.ENSP00000273854	-0.399387	3
TSSK4	ENSG00000139908	Tier 3B	9606.ENSP00000339179	-0.399413	7
CYP7A1	ENSG00000167910	Tier 1	9606.ENSP00000301645	-0.400343	5
PKN2	ENSG00000065243	Tier 1	9606.ENSP00000359552	-0.401722	2
HUNK	ENSG00000142149	Tier 2	9606.ENSP00000270112	-0.401839	7
MERTK	ENSG00000153208	Tier 1	9606.ENSP00000295408	-0.403156	3
TSSK3	ENSG00000162526	Tier 3B	9606.ENSP00000362634	-0.405383	7
EPHA10	ENSG00000183317	Tier 1	9606.ENSP00000362139	-0.407003	3
HPGD	ENSG00000164120	Tier 2	9606.ENSP00000296522	-0.40753	5
KLHL20	ENSG00000076321	Tier 3B	9606.ENSP00000209884	-0.408386	5
LMNA	ENSG00000160789	Tier 1	9606.ENSP00000357283	-0.409771	5
RPS6KB2	ENSG00000175634	Tier 2	9606.ENSP00000308413	-0.410226	2
CTNNB1	ENSG00000168036	Tier 2	9606.ENSP00000344456	-0.411414	5
PAK1	ENSG00000149269	Tier 1	9606.ENSP00000278568	-0.411425	2
TEC	ENSG00000135605	Tier 1	9606.ENSP00000370912	-0.415822	3
TUBA1A	ENSG00000167552	Tier 3B	9606.ENSP00000301071	-0.416674	8
FGF22	ENSG00000070388	Tier 3B	9606.ENSP00000215530	-0.41726	2
MAP2K5	ENSG00000137764	Tier 1	9606.ENSP00000178640	-0.417874	2
WNT11	ENSG00000085741	Tier 3A	9606.ENSP00000325526	-0.422955	6
PHF8	ENSG00000172943	Tier 2	9606.ENSP00000350676	-0.425329	6
BRDT	ENSG00000137948	Tier 2	9606.ENSP00000354568	-0.425852	6
CYP20A1	ENSG00000119004	Tier 1	9606.ENSP00000348380	-0.427873	5
WNT3A	ENSG00000154342	Tier 3B	9606.ENSP00000284523	-0.427945	6
PSMB7	ENSG00000136930	Tier 3B	9606.ENSP00000259457	-0.428728	5
STYK1	ENSG00000060140	Tier 3B	9606.ENSP00000075503	-0.429784	3
ROR1	ENSG00000185483	Tier 3B	9606.ENSP00000360120	-0.429784	3
KCNN2	ENSG00000080709	Tier 2	9606.ENSP00000264773	-0.430191	4
CDC42BPB	ENSG00000198752	Tier 2	9606.ENSP00000355237	-0.432654	3
POLA1	ENSG00000101868	Tier 1	9606.ENSP00000368349	-0.433275	5
LIG1	ENSG00000105486	Tier 2	9606.ENSP00000263274	-0.433481	5
FSHR	ENSG00000170820	Tier 1	9606.ENSP00000384708	-0.433809	5
SLCO4A1	ENSG00000101187	Tier 1	9606.ENSP00000217159	-0.434475	5
CACNA2D2	ENSG00000007402	Tier 1	9606.ENSP00000418081	-0.434739	4
HPRT1	ENSG00000165704	Tier 2	9606.ENSP00000298556	-0.435512	5
PSAP	ENSG00000197746	Tier 3A	9606.ENSP00000378394	-0.435593	5
ERBB2IP	ENSG00000112851	Tier 3B	9606.ENSP00000370330	-0.438162	2
PTK6	ENSG00000101213	Tier 1	9606.ENSP00000217185	-0.43848	3
MBNL1	ENSG00000152601	Tier 1	9606.ENSP00000282486	-0.441322	5
BLK	ENSG00000136573	Tier 1	9606.ENSP00000259089	-0.441469	3
IHH	ENSG00000163501	Tier 3A	9606.ENSP00000295731	-0.44153	6
RARB	ENSG00000077092	Tier 1	9606.ENSP00000332296	-0.441818	5
KDM4C	ENSG00000107077	Tier 2	9606.ENSP00000370710	-0.442808	6
HIST1H1C	ENSG00000187837	Tier 1	9606.ENSP00000339566	-0.443452	6
PDGFRL	ENSG00000104213	Tier 3B	9606.ENSP00000251630	-0.4438	3
TUBA1B	ENSG00000123416	Tier 3A	9606.ENSP00000336799	-0.444955	8
FRK	ENSG00000111816	Tier 1	9606.ENSP00000357615	-0.44609	3
GABRR1	ENSG00000146276	Tier 2	9606.ENSP00000412673	-0.446819	4
SFRP2	ENSG00000145423	Tier 3A	9606.ENSP00000274063	-0.447037	6
RYR2	ENSG00000198626	Tier 2	9606.ENSP00000355533	-0.448619	4
CYP2E1	ENSG00000130649	Tier 1	9606.ENSP00000252945	-0.450682	5
PARP2	ENSG00000129484	Tier 1	9606.ENSP00000250416	-0.452914	5
PTPN1	ENSG00000196396	Tier 2	9606.ENSP00000360683	-0.453914	2
CSK	ENSG00000103653	Tier 1	9606.ENSP00000220003	-0.455146	1
ERN2	ENSG00000134398	Tier 3B	9606.ENSP00000256797	-0.456473	3
FGF16	ENSG00000196468	Tier 1	9606.ENSP00000399324	-0.456635	2
KLHL33	ENSG00000185271	Tier 3B	9606.ENSP00000341549	-0.45928	6
RPS6KA4	ENSG00000162302	Tier 1	9606.ENSP00000333896	-0.459415	2
CYP27A1	ENSG00000135929	Tier 1	9606.ENSP00000258415	-0.460571	5
NUP210	ENSG00000132182	Tier 3B	9606.ENSP00000254508	-0.46081	5
CCNB1	ENSG00000134057	Tier 1	9606.ENSP00000256442	-0.461278	2
CCND3	ENSG00000112576	Tier 1	9606.ENSP00000362082	-0.463573	5
TSPO	ENSG00000100300	Tier 2	9606.ENSP00000328973	-0.464939	5
SIK3	ENSG00000160584	Tier 1	9606.ENSP00000292055	-0.466584	2
PASK	ENSG00000115687	Tier 2	9606.ENSP00000234040	-0.466907	3
FASN	ENSG00000169710	Tier 1	9606.ENSP00000304592	-0.467008	5
MAP3K5	ENSG00000197442	Tier 1	9606.ENSP00000351908	-0.467191	2
APEX1	ENSG00000100823	Tier 1	9606.ENSP00000216714	-0.467914	5
PLK4	ENSG00000142731	Tier 1	9606.ENSP00000270861	-0.468716	2
TSSK6	ENSG00000178093	Tier 3B	9606.ENSP00000354168	-0.469128	7
DSTYK	ENSG00000133059	Tier 1	9606.ENSP00000356130	-0.470335	1
EPHB6	ENSG00000106123	Tier 1	9606.ENSP00000376684	-0.471288	3
STK32B	ENSG00000152953	Tier 2	9606.ENSP00000282908	-0.472094	2
RPS6KA6	ENSG00000072133	Tier 1	9606.ENSP00000262752	-0.472384	2
STK32C	ENSG00000165752	Tier 2	9606.ENSP00000298630	-0.472504	2
KCNN3	ENSG00000143603	Tier 2	9606.ENSP00000271915	-0.474236	4
TESK1	ENSG00000107140	Tier 1	9606.ENSP00000338127	-0.476592	3
TUBB8	ENSG00000173876	Tier 2	9606.ENSP00000328808	-0.477193	8
WNT7A	ENSG00000154764	Tier 3A	9606.ENSP00000285018	-0.477298	6
ICAM1	ENSG00000090339	Tier 1	9606.ENSP00000264832	-0.478389	5
PSMA7	ENSG00000101182	Tier 3B	9606.ENSP00000359910	-0.481468	5
ENPP1	ENSG00000197594	Tier 3A	9606.ENSP00000354238	-0.482688	5
HDAC3	ENSG00000171720	Tier 1	9606.ENSP00000302967	-0.483152	6
POLE	ENSG00000177084	Tier 1	9606.ENSP00000322570	-0.484699	5
HBB	ENSG00000244734	Tier 2	9606.ENSP00000333994	-0.485691	5
CPT1B	ENSG00000205560	Tier 2	9606.ENSP00000312189	-0.486215	5
PSMB5	ENSG00000100804	Tier 1	9606.ENSP00000355325	-0.486556	5
IRAK2	ENSG00000134070	Tier 3B	9606.ENSP00000256458	-0.487007	3
CDKN1A	ENSG00000124762	Tier 2	9606.ENSP00000244741	-0.487137	5
AFP	ENSG00000081051	Tier 1	9606.ENSP00000379138	-0.487577	5
TPP1	ENSG00000166340	Tier 3B	9606.ENSP00000299427	-0.488042	5
PAH	ENSG00000171759	Tier 1	9606.ENSP00000448059	-0.490015	5
TESK2	ENSG00000070759	Tier 2	9606.ENSP00000361158	-0.4921	3
SRMS	ENSG00000125508	Tier 1	9606.ENSP00000217188	-0.492511	3
IL33	ENSG00000137033	Tier 3A	9606.ENSP00000370842	-0.492769	5
SGK2	ENSG00000101049	Tier 2	9606.ENSP00000340608	-0.492971	NA
PNP	ENSG00000198805	Tier 1	9606.ENSP00000354532	-0.493999	NA
PTGER4	ENSG00000171522	Tier 1	9606.ENSP00000302846	-0.494251	NA
USP47	ENSG00000170242	Tier 2	9606.ENSP00000339957	-0.494771	NA
SLC12A2	ENSG00000064651	Tier 2	9606.ENSP00000262461	-0.495307	NA
HIST1H1A	ENSG00000124610	Tier 1	9606.ENSP00000244573	-0.497155	NA
HDAC5	ENSG00000108840	Tier 1	9606.ENSP00000225983	-0.497931	NA
ACVRL1	ENSG00000139567	Tier 1	9606.ENSP00000373574	-0.498417	NA
ESRRG	ENSG00000196482	Tier 2	9606.ENSP00000386171	-0.498736	NA
CAMKV	ENSG00000164076	Tier 3B	9606.ENSP00000419195	-0.498741	NA
TERT	ENSG00000164362	Tier 2	9606.ENSP00000309572	-0.499763	NA
PSMA1	ENSG00000129084	Tier 3B	9606.ENSP00000414359	-0.500521	NA
LIMK2	ENSG00000182541	Tier 1	9606.ENSP00000339916	-0.50232	NA
AMY1A	ENSG00000237763	Tier 2	9606.ENSP00000359100	-0.502528	NA
GP1BA	ENSG00000185245	Tier 3A	9606.ENSP00000329380	-0.503312	NA
LIPJ	ENSG00000204022	Tier 2	9606.ENSP00000361007	-0.503557	NA
DRD2	ENSG00000149295	Tier 1	9606.ENSP00000354859	-0.505771	NA
FARS2	ENSG00000145982	Tier 2	9606.ENSP00000274680	-0.50738	NA
HIST1H4K	ENSG00000197914	Tier 3B	9606.ENSP00000350159	-0.507541	NA
STK40	ENSG00000196182	Tier 3B	9606.ENSP00000362221	-0.507803	NA
LRRC4B	ENSG00000131409	Tier 3B	9606.ENSP00000373853	-0.50804	NA
WNT1	ENSG00000125084	Tier 3B	9606.ENSP00000293549	-0.508321	NA
RXRB	ENSG00000204231	Tier 1	9606.ENSP00000363812	-0.509848	NA
PAOX	ENSG00000148832	Tier 2	9606.ENSP00000278060	-0.510332	NA
HMOX1	ENSG00000100292	Tier 3A	9606.ENSP00000216117	-0.511287	NA
CLU	ENSG00000120885	Tier 3A	9606.ENSP00000315130	-0.511913	NA
HDAC9	ENSG00000048052	Tier 1	9606.ENSP00000408617	-0.513008	NA
PSMA4	ENSG00000041357	Tier 3B	9606.ENSP00000044462	-0.514528	NA
DCN	ENSG00000011465	Tier 3B	9606.ENSP00000052754	-0.514692	NA
CCND1	ENSG00000110092	Tier 1	9606.ENSP00000227507	-0.515886	NA
MLKL	ENSG00000168404	Tier 3B	9606.ENSP00000308351	-0.517169	NA
AIMP1	ENSG00000164022	Tier 3B	9606.ENSP00000378191	-0.517467	NA
LINGO1	ENSG00000169783	Tier 1	9606.ENSP00000347451	-0.518048	NA
GSS	ENSG00000100983	Tier 1	9606.ENSP00000216951	-0.518781	NA
AMY2B	ENSG00000240038	Tier 2	9606.ENSP00000354610	-0.519349	NA
PRKAB1	ENSG00000111725	Tier 2	9606.ENSP00000229328	-0.519376	NA
ADORA2A	ENSG00000128271	Tier 1	9606.ENSP00000336630	-0.519801	NA
NLRP3	ENSG00000162711	Tier 2	9606.ENSP00000337383	-0.519855	NA
EPHA6	ENSG00000080224	Tier 1	9606.ENSP00000374323	-0.520152	NA
THRA	ENSG00000126351	Tier 1	9606.ENSP00000264637	-0.520213	NA
TUBD1	ENSG00000108423	Tier 3B	9606.ENSP00000320797	-0.522245	NA
AKR1C1	ENSG00000187134	Tier 1	9606.ENSP00000370254	-0.522627	NA
LRRK1	ENSG00000154237	Tier 3B	9606.ENSP00000373600	-0.52276	NA
HIST4H4	ENSG00000197837	Tier 3B	9606.ENSP00000350767	-0.524612	NA
TUBA8	ENSG00000183785	Tier 3B	9606.ENSP00000333326	-0.524886	NA
F2	ENSG00000180210	Tier 1	9606.ENSP00000308541	-0.524985	NA
CYP3A5	ENSG00000106258	Tier 1	9606.ENSP00000222982	-0.525831	NA
BPNT1	ENSG00000162813	Tier 3B	9606.ENSP00000318852	-0.52591	NA
FGF2	ENSG00000138685	Tier 1	9606.ENSP00000264498	-0.526944	NA
LMCD1	ENSG00000071282	Tier 3B	9606.ENSP00000157600	-0.527479	NA
STK32A	ENSG00000169302	Tier 2	9606.ENSP00000381030	-0.528462	NA
MYLK2	ENSG00000101306	Tier 1	9606.ENSP00000365152	-0.529692	NA
EGF	ENSG00000138798	Tier 3A	9606.ENSP00000265171	-0.530018	NA
MYLK4	ENSG00000145949	Tier 1	9606.ENSP00000274643	-0.530503	NA
EFNA5	ENSG00000184349	Tier 3A	9606.ENSP00000328777	-0.531084	NA
LRRC4	ENSG00000128594	Tier 3B	9606.ENSP00000249363	-0.532732	NA
LRRC4C	ENSG00000148948	Tier 3B	9606.ENSP00000278198	-0.532732	NA
CTGF	ENSG00000118523	Tier 1	9606.ENSP00000356954	-0.533878	NA
CDKL5	ENSG00000008086	Tier 1	9606.ENSP00000369325	-0.533969	NA
CYP1A2	ENSG00000140505	Tier 1	9606.ENSP00000342007	-0.535411	NA
GP1BB	ENSG00000203618	Tier 3B	9606.ENSP00000383382	-0.535466	NA
GUCY2F	ENSG00000101890	Tier 3B	9606.ENSP00000218006	-0.536194	NA
EPHA7	ENSG00000135333	Tier 1	9606.ENSP00000358309	-0.536247	NA
TUBAL3	ENSG00000178462	Tier 3B	9606.ENSP00000369784	-0.536542	NA
PSMB3	ENSG00000108294	Tier 3B	9606.ENSP00000225426	-0.536634	NA
IFNL1	ENSG00000182393	Tier 3A	9606.ENSP00000329991	-0.536636	NA
LIPN	ENSG00000204020	Tier 2	9606.ENSP00000383923	-0.536707	NA
OMG	ENSG00000126861	Tier 3B	9606.ENSP00000247271	-0.536715	NA
RXFP2	ENSG00000133105	Tier 3B	9606.ENSP00000298386	-0.536939	NA
LGALS3	ENSG00000131981	Tier 3A	9606.ENSP00000254301	-0.538227	NA
SMC3	ENSG00000108055	Tier 3B	9606.ENSP00000354720	-0.539168	NA
RANBP2	ENSG00000153201	Tier 2	9606.ENSP00000283195	-0.539873	NA
ERG	ENSG00000157554	Tier 2	9606.ENSP00000381891	-0.540631	NA
CP	ENSG00000047457	Tier 3A	9606.ENSP00000264613	-0.541118	NA
ADAM9	ENSG00000168615	Tier 1	9606.ENSP00000419446	-0.54297	NA
CDK20	ENSG00000156345	Tier 3B	9606.ENSP00000322343	-0.544134	NA
PIP	ENSG00000159763	Tier 3B	9606.ENSP00000291009	-0.544137	NA
PSMA3	ENSG00000100567	Tier 3B	9606.ENSP00000216455	-0.544342	NA
WDR5	ENSG00000196363	Tier 2	9606.ENSP00000351446	-0.544864	NA
CCNH	ENSG00000134480	Tier 2	9606.ENSP00000256897	-0.545203	NA
TLR7	ENSG00000196664	Tier 1	9606.ENSP00000370034	-0.547375	NA
RIOK3	ENSG00000101782	Tier 1	9606.ENSP00000341874	-0.548971	NA
GP9	ENSG00000169704	Tier 3B	9606.ENSP00000303942	-0.550418	NA
IDO1	ENSG00000131203	Tier 2	9606.ENSP00000430505	-0.551781	NA
UBE2N	ENSG00000177889	Tier 2	9606.ENSP00000316176	-0.552548	NA
HIST1H4D	ENSG00000188987	Tier 3A	9606.ENSP00000343282	-0.553798	NA
HIST1H4I	ENSG00000198339	Tier 3A	9606.ENSP00000346316	-0.553798	NA
HIST2H4B	ENSG00000182217	Tier 3B	9606.ENSP00000358153	-0.553798	NA
HIST1H4J	ENSG00000197238	Tier 3B	9606.ENSP00000347168	-0.553798	NA
HIST1H4L	ENSG00000198558	Tier 3B	9606.ENSP00000348258	-0.553798	NA
FMOD	ENSG00000122176	Tier 3B	9606.ENSP00000347041	-0.55491	NA
HIST1H4B	ENSG00000124529	Tier 3A	9606.ENSP00000366581	-0.555349	NA
HIST1H4E	ENSG00000198518	Tier 3A	9606.ENSP00000353624	-0.555349	NA
NPR1	ENSG00000169418	Tier 1	9606.ENSP00000357669	-0.557127	NA
EFNA4	ENSG00000243364	Tier 3B	9606.ENSP00000414378	-0.557746	NA
RNASEH1	ENSG00000171865	Tier 2	9606.ENSP00000313350	-0.557939	NA
CACNA1A	ENSG00000141837	Tier 2	9606.ENSP00000353362	-0.558861	NA
NRG1	ENSG00000157168	Tier 3A	9606.ENSP00000349275	-0.559302	NA
OLR1	ENSG00000173391	Tier 3B	9606.ENSP00000309124	-0.559748	NA
HIST1H1B	ENSG00000184357	Tier 1	9606.ENSP00000330074	-0.56244	NA
ALDH3A1	ENSG00000108602	Tier 1	9606.ENSP00000225740	-0.562488	NA
KLHL13	ENSG00000003096	Tier 3B	9606.ENSP00000443191	-0.563011	NA
PTPRC	ENSG00000081237	Tier 1	9606.ENSP00000356346	-0.563336	NA
ODC1	ENSG00000115758	Tier 1	9606.ENSP00000234111	-0.563662	NA
GP5	ENSG00000178732	Tier 3B	9606.ENSP00000319286	-0.565028	NA
DDO	ENSG00000203797	Tier 1	9606.ENSP00000357920	-0.565466	NA
NAE1	ENSG00000159593	Tier 2	9606.ENSP00000290810	-0.565898	NA
IK	ENSG00000113141	Tier 3B	9606.ENSP00000396301	-0.566312	NA
HNF4A	ENSG00000101076	Tier 1	9606.ENSP00000312987	-0.566924	NA
PDGFA	ENSG00000197461	Tier 3B	9606.ENSP00000346508	-0.567034	NA
NR4A3	ENSG00000119508	Tier 3B	9606.ENSP00000333122	-0.56739	NA
EFNB3	ENSG00000108947	Tier 3A	9606.ENSP00000226091	-0.567436	NA
NLGN1	ENSG00000169760	Tier 3B	9606.ENSP00000354541	-0.568051	NA
LGR4	ENSG00000205213	Tier 3B	9606.ENSP00000368516	-0.568245	NA
CDK11A	ENSG00000008128	Tier 2	9606.ENSP00000384442	-0.569428	NA
BGN	ENSG00000182492	Tier 3B	9606.ENSP00000327336	-0.569979	NA
LUM	ENSG00000139329	Tier 3A	9606.ENSP00000266718	-0.570613	NA
HIST1H4H	ENSG00000158406	Tier 3A	9606.ENSP00000289352	-0.570868	NA
TSG101	ENSG00000074319	Tier 1	9606.ENSP00000251968	-0.571336	NA
PLK3	ENSG00000173846	Tier 2	9606.ENSP00000361275	-0.571968	NA
RXFP1	ENSG00000171509	Tier 2	9606.ENSP00000303248	-0.571987	NA
HIST1H4F	ENSG00000198327	Tier 3A	9606.ENSP00000366974	-0.57242	NA
HIST2H4A	ENSG00000183941	Tier 3B	9606.ENSP00000358162	-0.57242	NA
CHID1	ENSG00000177830	Tier 3A	9606.ENSP00000338838	-0.57319	NA
PSKH2	ENSG00000147613	Tier 3B	9606.ENSP00000276616	-0.573406	NA
TUBA3E	ENSG00000152086	Tier 3B	9606.ENSP00000318197	-0.574501	NA
NDFIP1	ENSG00000131507	Tier 3A	9606.ENSP00000253814	-0.575914	NA
LGR5	ENSG00000139292	Tier 3B	9606.ENSP00000266674	-0.576902	NA
CYP3A7	ENSG00000160870	Tier 1	9606.ENSP00000337450	-0.577538	NA
ALDH8A1	ENSG00000118514	Tier 1	9606.ENSP00000265605	-0.577844	NA
ASPN	ENSG00000106819	Tier 3B	9606.ENSP00000364694	-0.577998	NA
KDM4A	ENSG00000066135	Tier 2	9606.ENSP00000361473	-0.578188	NA
CDKL4	ENSG00000205111	Tier 3B	9606.ENSP00000368080	-0.579122	NA
LINGO2	ENSG00000174482	Tier 3B	9606.ENSP00000310126	-0.579165	NA
KBTBD2	ENSG00000170852	Tier 3B	9606.ENSP00000302586	-0.580187	NA
KLHL3	ENSG00000146021	Tier 3B	9606.ENSP00000312397	-0.580429	NA
KLHL9	ENSG00000198642	Tier 3B	9606.ENSP00000351933	-0.581163	NA
PARP4	ENSG00000102699	Tier 2	9606.ENSP00000371419	-0.581376	NA
LRIG3	ENSG00000139263	Tier 3B	9606.ENSP00000326759	-0.581797	NA
MAP3K15	ENSG00000180815	Tier 1	9606.ENSP00000345629	-0.581928	NA
DEAF1	ENSG00000177030	Tier 3B	9606.ENSP00000371846	-0.58239	NA
EREG	ENSG00000124882	Tier 1	9606.ENSP00000244869	-0.582693	NA
EPAS1	ENSG00000116016	Tier 2	9606.ENSP00000263734	-0.583268	NA
MOS	ENSG00000172680	Tier 3B	9606.ENSP00000310722	-0.58369	NA
APOBEC3G	ENSG00000239713	Tier 2	9606.ENSP00000385057	-0.584036	NA
PODN	ENSG00000174348	Tier 3A	9606.ENSP00000308315	-0.586073	NA
OPTC	ENSG00000188770	Tier 3A	9606.ENSP00000356191	-0.586073	NA
PKD2	ENSG00000118762	Tier 2	9606.ENSP00000237596	-0.586151	NA
TULP2	ENSG00000104804	Tier 3B	9606.ENSP00000221399	-0.586352	NA
RXRG	ENSG00000143171	Tier 1	9606.ENSP00000352900	-0.586434	NA
TGFB3	ENSG00000119699	Tier 1	9606.ENSP00000238682	-0.586448	NA
L3MBTL1	ENSG00000185513	Tier 1	9606.ENSP00000398516	-0.586711	NA
TPBG	ENSG00000146242	Tier 1	9606.ENSP00000358765	-0.587552	NA
CHAD	ENSG00000136457	Tier 3A	9606.ENSP00000258969	-0.58796	NA
EPYC	ENSG00000083782	Tier 3B	9606.ENSP00000261172	-0.58796	NA
ISLR2	ENSG00000167178	Tier 3B	9606.ENSP00000355402	-0.58796	NA
LRRN3	ENSG00000173114	Tier 3B	9606.ENSP00000312001	-0.58796	NA
LRRC55	ENSG00000183908	Tier 3B	9606.ENSP00000419542	-0.58796	NA
CYP3A4	ENSG00000160868	Tier 1	9606.ENSP00000337915	-0.588466	NA
OMD	ENSG00000127083	Tier 3B	9606.ENSP00000364700	-0.588835	NA
TUBG2	ENSG00000037042	Tier 3B	9606.ENSP00000251412	-0.589555	NA
OGN	ENSG00000106809	Tier 3B	9606.ENSP00000262551	-0.589889	NA
SAE1	ENSG00000142230	Tier 2	9606.ENSP00000270225	-0.590667	NA
TSSK1B	ENSG00000212122	Tier 1	9606.ENSP00000375081	-0.590807	NA
UBA2	ENSG00000126261	Tier 2	9606.ENSP00000246548	-0.591566	NA
DAPK3	ENSG00000167657	Tier 1	9606.ENSP00000301264	-0.591689	NA
RTN4R	ENSG00000040608	Tier 3A	9606.ENSP00000043402	-0.592117	NA
HIPK2	ENSG00000064393	Tier 1	9606.ENSP00000385571	-0.592981	NA
ADAM17	ENSG00000151694	Tier 1	9606.ENSP00000309968	-0.5936	NA
LRRC26	ENSG00000184709	Tier 3A	9606.ENSP00000360597	-0.594272	NA
CHADL	ENSG00000100399	Tier 3B	9606.ENSP00000216241	-0.594272	NA
EGFR	ENSG00000146648	Tier 1	9606.ENSP00000275493	-0.594317	NA
PCK1	ENSG00000124253	Tier 2	9606.ENSP00000319814	-0.594847	NA
SLC3A2	ENSG00000168003	Tier 3B	9606.ENSP00000367123	-0.595221	NA
LRG1	ENSG00000171236	Tier 3B	9606.ENSP00000302621	-0.595573	NA
LRRC17	ENSG00000128606	Tier 3B	9606.ENSP00000344242	-0.595707	NA
CYP7B1	ENSG00000172817	Tier 1	9606.ENSP00000310721	-0.595857	NA
LRRTM3	ENSG00000198739	Tier 3B	9606.ENSP00000355187	-0.597594	NA
HIST1H3A	ENSG00000198366	Tier 3A	9606.ENSP00000350275	-0.598666	NA
LGR6	ENSG00000133067	Tier 3B	9606.ENSP00000356247	-0.598743	NA
PSKH1	ENSG00000159792	Tier 3A	9606.ENSP00000291041	-0.598746	NA
RRM2	ENSG00000171848	Tier 1	9606.ENSP00000353770	-0.599654	NA
STK33	ENSG00000130413	Tier 1	9606.ENSP00000320754	-0.600725	NA
NCOR2	ENSG00000196498	Tier 1	9606.ENSP00000384018	-0.600852	NA
TRAC	ENSG00000229164	Tier 1	9606.ENSP00000384018	-0.600852	NA
OPRM1	ENSG00000112038	Tier 1	9606.ENSP00000394624	-0.600952	NA
PPT1	ENSG00000131238	Tier 3B	9606.ENSP00000394863	-0.602392	NA
TSSK2	ENSG00000206203	Tier 2	9606.ENSP00000382544	-0.602982	NA
UBA6	ENSG00000033178	Tier 2	9606.ENSP00000313454	-0.60315	NA
EPHX1	ENSG00000143819	Tier 1	9606.ENSP00000272167	-0.603362	NA
HIST1H4C	ENSG00000197061	Tier 3A	9606.ENSP00000367034	-0.604309	NA
CHRNA4	ENSG00000101204	Tier 1	9606.ENSP00000359285	-0.605751	NA
PODNL1	ENSG00000132000	Tier 3B	9606.ENSP00000345175	-0.606377	NA
RTN4RL1	ENSG00000185924	Tier 3B	9606.ENSP00000330631	-0.606377	NA
LRIT2	ENSG00000204033	Tier 3B	9606.ENSP00000361185	-0.606377	NA
PRELP	ENSG00000188783	Tier 3A	9606.ENSP00000343924	-0.607409	NA
NR2F1	ENSG00000175745	Tier 3B	9606.ENSP00000325819	-0.607906	NA
STK16	ENSG00000115661	Tier 1	9606.ENSP00000379964	-0.607942	NA
ALDH1A3	ENSG00000184254	Tier 1	9606.ENSP00000332256	-0.608029	NA
CRY2	ENSG00000121671	Tier 3A	9606.ENSP00000406751	-0.608365	NA
PINK1	ENSG00000158828	Tier 3B	9606.ENSP00000364204	-0.608875	NA
AMY1B	ENSG00000174876	Tier 2	9606.ENSP00000330484	-0.609297	NA
PPP3CA	ENSG00000138814	Tier 1	9606.ENSP00000378323	-0.609633	NA
SRM	ENSG00000116649	Tier 2	9606.ENSP00000366156	-0.609647	NA
C19orf10	ENSG00000074842	Tier 3B	9606.ENSP00000262947	-0.609703	NA
GABRB2	ENSG00000145864	Tier 1	9606.ENSP00000274547	-0.609831	NA
NR0B1	ENSG00000169297	Tier 3B	9606.ENSP00000368253	-0.611314	NA
CYP51A1	ENSG00000001630	Tier 1	9606.ENSP00000003100	-0.611577	NA
CSN2	ENSG00000135222	Tier 3B	9606.ENSP00000341030	-0.611578	NA
IVNS1ABP	ENSG00000116679	Tier 3B	9606.ENSP00000356468	-0.611961	NA
SCG2	ENSG00000171951	Tier 3A	9606.ENSP00000304133	-0.612042	NA
PTK2B	ENSG00000120899	Tier 1	9606.ENSP00000332816	-0.612874	NA
HSD17B2	ENSG00000086696	Tier 2	9606.ENSP00000199936	-0.613369	NA
CD180	ENSG00000134061	Tier 3A	9606.ENSP00000256447	-0.614085	NA
CHI3L1	ENSG00000133048	Tier 3A	9606.ENSP00000255409	-0.61435	NA
INS-IGF2	ENSG00000129965	Tier 3A	9606.ENSP00000348986	-0.614514	NA
DNMT1	ENSG00000130816	Tier 1	9606.ENSP00000352516	-0.615218	NA
NR4A1	ENSG00000123358	Tier 2	9606.ENSP00000353427	-0.615971	NA
FLRT1	ENSG00000126500	Tier 3B	9606.ENSP00000246841	-0.616035	NA
IGFALS	ENSG00000099769	Tier 3A	9606.ENSP00000416683	-0.616042	NA
GYPA	ENSG00000170180	Tier 3B	9606.ENSP00000354003	-0.616276	NA
NR1D2	ENSG00000174738	Tier 2	9606.ENSP00000310006	-0.61737	NA
AZIN1	ENSG00000155096	Tier 2	9606.ENSP00000321507	-0.617669	NA
TLR8	ENSG00000101916	Tier 2	9606.ENSP00000218032	-0.617745	NA
DOT1L	ENSG00000104885	Tier 2	9606.ENSP00000381657	-0.617859	NA
H3F3B	ENSG00000132475	Tier 3B	9606.ENSP00000254810	-0.617953	NA
MAP3K9	ENSG00000006432	Tier 1	9606.ENSP00000451263	-0.618075	NA
CYP26A1	ENSG00000095596	Tier 1	9606.ENSP00000224356	-0.618828	NA
BCAM	ENSG00000187244	Tier 3A	9606.ENSP00000270233	-0.619346	NA
TARS	ENSG00000113407	Tier 2	9606.ENSP00000265112	-0.619479	NA
CCNT1	ENSG00000129315	Tier 1	9606.ENSP00000261900	-0.619548	NA
CYP2D6	ENSG00000100197	Tier 1	9606.ENSP00000353820	-0.619698	NA
AMY2A	ENSG00000243480	Tier 1	9606.ENSP00000397582	-0.619844	NA
HGF	ENSG00000019991	Tier 1	9606.ENSP00000222390	-0.621111	NA
H3F3A	ENSG00000163041	Tier 3B	9606.ENSP00000355778	-0.621245	NA
ESR2	ENSG00000140009	Tier 1	9606.ENSP00000343925	-0.621317	NA
GBA	ENSG00000177628	Tier 1	9606.ENSP00000314508	-0.621638	NA
MAP3K6	ENSG00000142733	Tier 2	9606.ENSP00000350195	-0.623419	NA
CAMK1D	ENSG00000183049	Tier 1	9606.ENSP00000368124	-0.624825	NA
PTPN13	ENSG00000163629	Tier 2	9606.ENSP00000394794	-0.625206	NA
PPP1CA	ENSG00000172531	Tier 2	9606.ENSP00000326031	-0.625453	NA
SBSN	ENSG00000189001	Tier 3A	9606.ENSP00000430242	-0.625588	NA
PLK2	ENSG00000145632	Tier 2	9606.ENSP00000274289	-0.62759	NA
CHI3L2	ENSG00000064886	Tier 3B	9606.ENSP00000358763	-0.627876	NA
DAO	ENSG00000110887	Tier 2	9606.ENSP00000228476	-0.627952	NA
CTSV	ENSG00000136943	Tier 1	9606.ENSP00000259470	-0.62798	NA
TAF1A	ENSG00000143498	Tier 1	9606.ENSP00000327072	-0.628891	NA
GUCY2C	ENSG00000070019	Tier 1	9606.ENSP00000261170	-0.62898	NA
XBP1	ENSG00000100219	Tier 2	9606.ENSP00000216037	-0.629106	NA
LRRN1	ENSG00000175928	Tier 3B	9606.ENSP00000314901	-0.630383	NA
ABL2	ENSG00000143322	Tier 1	9606.ENSP00000427562	-0.631028	NA
IL21R	ENSG00000103522	Tier 3A	9606.ENSP00000338010	-0.631698	NA
ATP2C1	ENSG00000017260	Tier 3B	9606.ENSP00000376914	-0.631764	NA
CPN2	ENSG00000178772	Tier 3B	9606.ENSP00000319464	-0.632521	NA
HDAC8	ENSG00000147099	Tier 1	9606.ENSP00000362674	-0.633319	NA
KLHL15	ENSG00000174010	Tier 3B	9606.ENSP00000332791	-0.633447	NA
TLR10	ENSG00000174123	Tier 3B	9606.ENSP00000308925	-0.633575	NA
MUC3A	ENSG00000169894	Tier 3A	9606.ENSP00000324834	-0.633641	NA
HLCS	ENSG00000159267	Tier 2	9606.ENSP00000338387	-0.633768	NA
NQO1	ENSG00000181019	Tier 1	9606.ENSP00000319788	-0.634583	NA
KBTBD8	ENSG00000163376	Tier 3B	9606.ENSP00000401878	-0.635358	NA
LIPE	ENSG00000079435	Tier 2	9606.ENSP00000244289	-0.636052	NA
SCYL2	ENSG00000136021	Tier 3B	9606.ENSP00000354061	-0.636384	NA
ESRRB	ENSG00000119715	Tier 1	9606.ENSP00000370270	-0.637084	NA
MGEA5	ENSG00000198408	Tier 2	9606.ENSP00000354850	-0.637932	NA
CYP24A1	ENSG00000019186	Tier 1	9606.ENSP00000216862	-0.638168	NA
KERA	ENSG00000139330	Tier 3A	9606.ENSP00000266719	-0.638232	NA
MAP3K11	ENSG00000173327	Tier 1	9606.ENSP00000309597	-0.638629	NA
REV3L	ENSG00000009413	Tier 3B	9606.ENSP00000351697	-0.639805	NA
ATIC	ENSG00000138363	Tier 2	9606.ENSP00000236959	-0.640021	NA
CCR5	ENSG00000160791	Tier 1	9606.ENSP00000292303	-0.64022	NA
CRISP1	ENSG00000124812	Tier 3B	9606.ENSP00000338276	-0.640927	NA
WNT10B	ENSG00000169884	Tier 3B	9606.ENSP00000301061	-0.640988	NA
TDGF1	ENSG00000241186	Tier 1	9606.ENSP00000296145	-0.642004	NA
PSMB4	ENSG00000159377	Tier 3B	9606.ENSP00000290541	-0.642261	NA
NR2F2	ENSG00000185551	Tier 3B	9606.ENSP00000377721	-0.642445	NA
VEGFA	ENSG00000112715	Tier 1	9606.ENSP00000361125	-0.642878	NA
MAP3K10	ENSG00000130758	Tier 1	9606.ENSP00000253055	-0.64408	NA
SLIT3	ENSG00000184347	Tier 3A	9606.ENSP00000430333	-0.645452	NA
SLC5A11	ENSG00000158865	Tier 2	9606.ENSP00000289932	-0.645844	NA
RELN	ENSG00000189056	Tier 3A	9606.ENSP00000392423	-0.64611	NA
HIST2H3A	ENSG00000203852	Tier 3B	9606.ENSP00000385479	-0.646122	NA
SLC2A1	ENSG00000117394	Tier 2	9606.ENSP00000416293	-0.646425	NA
AMY1C	ENSG00000187733	Tier 2	9606.ENSP00000359096	-0.646485	NA
ECE1	ENSG00000117298	Tier 2	9606.ENSP00000364028	-0.647151	NA
SLC6A3	ENSG00000142319	Tier 1	9606.ENSP00000270349	-0.647285	NA
TRPA1	ENSG00000104321	Tier 1	9606.ENSP00000262209	-0.647687	NA
RYR3	ENSG00000198838	Tier 1	9606.ENSP00000373884	-0.647786	NA
NYX	ENSG00000188937	Tier 3B	9606.ENSP00000340328	-0.64875	NA
ATP2A1	ENSG00000196296	Tier 3A	9606.ENSP00000349595	-0.649033	NA
CYP2A6	ENSG00000255974	Tier 1	9606.ENSP00000301141	-0.649763	NA
ENG	ENSG00000106991	Tier 1	9606.ENSP00000362299	-0.651059	NA
HIST1H4A	ENSG00000196176	Tier 3A	9606.ENSP00000352980	-0.651418	NA
ATF1	ENSG00000123268	Tier 2	9606.ENSP00000262053	-0.65313	NA
PTPRS	ENSG00000105426	Tier 2	9606.ENSP00000349932	-0.653978	NA
MAP3K19	ENSG00000176601	Tier 1	9606.ENSP00000365005	-0.656983	NA
ECM2	ENSG00000106823	Tier 3B	9606.ENSP00000344758	-0.657059	NA
ABCB6	ENSG00000115657	Tier 1	9606.ENSP00000265316	-0.657553	NA
SLIT1	ENSG00000187122	Tier 3A	9606.ENSP00000266058	-0.657625	NA
KLHL10	ENSG00000161594	Tier 3B	9606.ENSP00000293303	-0.659058	NA
PSMB11	ENSG00000222028	Tier 2	9606.ENSP00000386212	-0.659464	NA
CDC25A	ENSG00000164045	Tier 2	9606.ENSP00000303706	-0.659811	NA
KLHL2	ENSG00000109466	Tier 3B	9606.ENSP00000424198	-0.659965	NA
PSMB8	ENSG00000204264	Tier 1	9606.ENSP00000364016	-0.660511	NA
ATP2A2	ENSG00000174437	Tier 3B	9606.ENSP00000440045	-0.660716	NA
DNMT3B	ENSG00000088305	Tier 2	9606.ENSP00000328547	-0.661805	NA
CYP21A2	ENSG00000231852	Tier 3B	9606.ENSP00000408860	-0.662112	NA
FPGS	ENSG00000136877	Tier 2	9606.ENSP00000362344	-0.66223	NA
CDK11B	ENSG00000248333	Tier 2	9606.ENSP00000464036	-0.662708	NA
HIST2H3C	ENSG00000203811	Tier 3B	9606.ENSP00000358154	-0.664026	NA
CACNB4	ENSG00000182389	Tier 3B	9606.ENSP00000438949	-0.664083	NA
FOLH1	ENSG00000086205	Tier 1	9606.ENSP00000256999	-0.664218	NA
PSMA6	ENSG00000100902	Tier 3B	9606.ENSP00000261479	-0.664282	NA
HIST2H3D	ENSG00000183598	Tier 3B	9606.ENSP00000333277	-0.664754	NA
PSMA5	ENSG00000143106	Tier 3B	9606.ENSP00000271308	-0.664858	NA
DAPK2	ENSG00000035664	Tier 1	9606.ENSP00000261891	-0.664987	NA
CDC25C	ENSG00000158402	Tier 2	9606.ENSP00000321656	-0.664997	NA
CYP11A1	ENSG00000140459	Tier 1	9606.ENSP00000268053	-0.666203	NA
GPR35	ENSG00000178623	Tier 1	9606.ENSP00000415890	-0.666538	NA
AZGP1	ENSG00000160862	Tier 3B	9606.ENSP00000292401	-0.66792	NA
HIST1H3E	ENSG00000196966	Tier 3A	9606.ENSP00000353581	-0.668964	NA
FABP1	ENSG00000163586	Tier 1	9606.ENSP00000295834	-0.669979	NA
BMPR1A	ENSG00000107779	Tier 2	9606.ENSP00000224764	-0.671012	NA
KLHL24	ENSG00000114796	Tier 3B	9606.ENSP00000242810	-0.671016	NA
NPR2	ENSG00000159899	Tier 3B	9606.ENSP00000341083	-0.671779	NA
CAMK1	ENSG00000134072	Tier 2	9606.ENSP00000256460	-0.671927	NA
PRSS54	ENSG00000103023	Tier 3B	9606.ENSP00000219301	-0.672377	NA
VASN	ENSG00000168140	Tier 3B	9606.ENSP00000306864	-0.673593	NA
ERAP1	ENSG00000164307	Tier 3A	9606.ENSP00000296754	-0.673648	NA
ABCG2	ENSG00000118777	Tier 1	9606.ENSP00000237612	-0.674292	NA
WNT3	ENSG00000108379	Tier 2	9606.ENSP00000225512	-0.674663	NA
HIST1H3B	ENSG00000124693	Tier 3A	9606.ENSP00000244661	-0.674991	NA
GUCY2D	ENSG00000132518	Tier 3B	9606.ENSP00000254854	-0.676579	NA
DCT	ENSG00000080166	Tier 3B	9606.ENSP00000392762	-0.676791	NA
GUCY1A3	ENSG00000164116	Tier 2	9606.ENSP00000296518	-0.67699	NA
BUB1	ENSG00000169679	Tier 3B	9606.ENSP00000302530	-0.678085	NA
SIRT3	ENSG00000142082	Tier 2	9606.ENSP00000372191	-0.67823	NA
CD52	ENSG00000169442	Tier 1	9606.ENSP00000363330	-0.679142	NA
P4HA1	ENSG00000122884	Tier 3B	9606.ENSP00000263556	-0.679581	NA
ADHFE1	ENSG00000147576	Tier 1	9606.ENSP00000379865	-0.680217	NA
TNNI3K	ENSG00000116783	Tier 1	9606.ENSP00000359928	-0.681542	NA
CD160	ENSG00000117281	Tier 3A	9606.ENSP00000235933	-0.683551	NA
ATP2C2	ENSG00000064270	Tier 3B	9606.ENSP00000262429	-0.684126	NA
MAP3K8	ENSG00000107968	Tier 2	9606.ENSP00000263056	-0.684633	NA
CAMKK2	ENSG00000110931	Tier 1	9606.ENSP00000312741	-0.684866	NA
KLHL28	ENSG00000179454	Tier 3B	9606.ENSP00000379434	-0.685566	NA
IL32	ENSG00000008517	Tier 3A	9606.ENSP00000324742	-0.686299	NA
CELSR1	ENSG00000075275	Tier 3B	9606.ENSP00000262738	-0.686422	NA
KLHL8	ENSG00000145332	Tier 3B	9606.ENSP00000273963	-0.686893	NA
TLR5	ENSG00000187554	Tier 3B	9606.ENSP00000340089	-0.687205	NA
NEK11	ENSG00000114670	Tier 2	9606.ENSP00000372857	-0.687208	NA
SLC15A1	ENSG00000088386	Tier 1	9606.ENSP00000365686	-0.688296	NA
GLIPR1L1	ENSG00000173401	Tier 3B	9606.ENSP00000310770	-0.688606	NA
SCP2	ENSG00000116171	Tier 2	9606.ENSP00000360569	-0.688988	NA
PTPRA	ENSG00000132670	Tier 2	9606.ENSP00000369756	-0.689975	NA
GCLC	ENSG00000001084	Tier 2	9606.ENSP00000229416	-0.691356	NA
HIST1H3J	ENSG00000197153	Tier 3B	9606.ENSP00000352252	-0.691818	NA
GUCY1B3	ENSG00000061918	Tier 1	9606.ENSP00000264424	-0.691962	NA
IGFBP5	ENSG00000115461	Tier 2	9606.ENSP00000233813	-0.694807	NA
MUC4	ENSG00000145113	Tier 3B	9606.ENSP00000417498	-0.694912	NA
HIST1H3D	ENSG00000197409	Tier 3A	9606.ENSP00000366999	-0.6956	NA
GUCY1A2	ENSG00000152402	Tier 3A	9606.ENSP00000431245	-0.696021	NA
MPO	ENSG00000005381	Tier 1	9606.ENSP00000225275	-0.696592	NA
SMN1	ENSG00000172062	Tier 1	9606.ENSP00000370083	-0.697069	NA
HIST1H3I	ENSG00000182572	Tier 3B	9606.ENSP00000329554	-0.697082	NA
HIST1H3H	ENSG00000203813	Tier 3B	9606.ENSP00000358160	-0.697082	NA
CDKL3	ENSG00000006837	Tier 2	9606.ENSP00000265334	-0.697144	NA
IBSP	ENSG00000029559	Tier 3A	9606.ENSP00000226284	-0.697323	NA
METAP1	ENSG00000164024	Tier 1	9606.ENSP00000296411	-0.697815	NA
DST	ENSG00000151914	Tier 3B	9606.ENSP00000244364	-0.697993	NA
DBF4	ENSG00000006634	Tier 2	9606.ENSP00000265728	-0.699421	NA
CASP3	ENSG00000164305	Tier 2	9606.ENSP00000311032	-0.699799	NA
CACNA1E	ENSG00000198216	Tier 3B	9606.ENSP00000356545	-0.700822	NA
CRISPLD2	ENSG00000103196	Tier 3A	9606.ENSP00000262424	-0.700955	NA
ANKK1	ENSG00000170209	Tier 1	9606.ENSP00000306678	-0.701144	NA
PNCK	ENSG00000130822	Tier 3B	9606.ENSP00000405950	-0.7014	NA
CDKL1	ENSG00000100490	Tier 2	9606.ENSP00000379176	-0.702403	NA
PTPRB	ENSG00000127329	Tier 2	9606.ENSP00000334928	-0.702559	NA
NR5A2	ENSG00000116833	Tier 3A	9606.ENSP00000356331	-0.704437	NA
PTPRN	ENSG00000054356	Tier 3B	9606.ENSP00000295718	-0.705412	NA
HEXA	ENSG00000213614	Tier 3B	9606.ENSP00000268097	-0.705424	NA
STK3	ENSG00000104375	Tier 1	9606.ENSP00000390500	-0.7058	NA
GAPDH	ENSG00000111640	Tier 2	9606.ENSP00000229239	-0.706085	NA
RPN1	ENSG00000163902	Tier 3A	9606.ENSP00000296255	-0.706386	NA
CYP4V2	ENSG00000145476	Tier 3B	9606.ENSP00000368079	-0.70646	NA
SOD1	ENSG00000142168	Tier 1	9606.ENSP00000270142	-0.706697	NA
NCSTN	ENSG00000162736	Tier 1	9606.ENSP00000294785	-0.706883	NA
IL5	ENSG00000113525	Tier 1	9606.ENSP00000231454	-0.707731	NA
MSR1	ENSG00000038945	Tier 3B	9606.ENSP00000262101	-0.707893	NA
CYP2J2	ENSG00000134716	Tier 1	9606.ENSP00000360247	-0.708655	NA
DLL4	ENSG00000128917	Tier 1	9606.ENSP00000249749	-0.709484	NA
CHUK	ENSG00000213341	Tier 1	9606.ENSP00000359424	-0.710851	NA
CYP1B1	ENSG00000138061	Tier 1	9606.ENSP00000260630	-0.71124	NA
CACNB1	ENSG00000067191	Tier 3B	9606.ENSP00000377840	-0.713378	NA
UCHL1	ENSG00000154277	Tier 2	9606.ENSP00000284440	-0.717425	NA
KARS	ENSG00000065427	Tier 2	9606.ENSP00000325448	-0.717899	NA
AKR1C3	ENSG00000196139	Tier 1	9606.ENSP00000369927	-0.718084	NA
LPO	ENSG00000167419	Tier 3B	9606.ENSP00000262290	-0.719965	NA
CSNK2A1	ENSG00000101266	Tier 1	9606.ENSP00000217244	-0.72149	NA
CSN1S1	ENSG00000126545	Tier 3B	9606.ENSP00000246891	-0.722354	NA
NLGN2	ENSG00000169992	Tier 3B	9606.ENSP00000305288	-0.722625	NA
IL2	ENSG00000109471	Tier 1	9606.ENSP00000226730	-0.722641	NA
EGLN1	ENSG00000135766	Tier 1	9606.ENSP00000355601	-0.723168	NA
KLHL22	ENSG00000099910	Tier 3B	9606.ENSP00000331682	-0.724582	NA
RNLS	ENSG00000184719	Tier 3A	9606.ENSP00000332530	-0.728064	NA
F7	ENSG00000057593	Tier 1	9606.ENSP00000364731	-0.728604	NA
MAGEA3	ENSG00000221867	Tier 1	9606.ENSP00000359301	-0.732237	NA
LOXL2	ENSG00000134013	Tier 3B	9606.ENSP00000373783	-0.73245	NA
KLHL5	ENSG00000109790	Tier 3B	9606.ENSP00000423897	-0.732506	NA
IL12RB1	ENSG00000096996	Tier 1	9606.ENSP00000403103	-0.735635	NA
FAS	ENSG00000026103	Tier 3A	9606.ENSP00000347979	-0.735792	NA
MS4A1	ENSG00000156738	Tier 1	9606.ENSP00000314620	-0.738029	NA
PTPRG	ENSG00000144724	Tier 3A	9606.ENSP00000418112	-0.738105	NA
IDE	ENSG00000119912	Tier 2	9606.ENSP00000265986	-0.738648	NA
CST3	ENSG00000101439	Tier 3A	9606.ENSP00000366124	-0.741496	NA
GFPT1	ENSG00000198380	Tier 2	9606.ENSP00000354347	-0.742434	NA
ATP2A3	ENSG00000074370	Tier 3A	9606.ENSP00000353072	-0.74323	NA
FABP2	ENSG00000145384	Tier 2	9606.ENSP00000274024	-0.745626	NA
CXCR4	ENSG00000121966	Tier 1	9606.ENSP00000386884	-0.745632	NA
SENP8	ENSG00000166192	Tier 2	9606.ENSP00000340505	-0.745931	NA
APOD	ENSG00000189058	Tier 3B	9606.ENSP00000345179	-0.746513	NA
COL12A1	ENSG00000111799	Tier 3B	9606.ENSP00000325146	-0.747677	NA
POSTN	ENSG00000133110	Tier 3B	9606.ENSP00000369071	-0.747973	NA
SLC5A7	ENSG00000115665	Tier 2	9606.ENSP00000264047	-0.748129	NA
GSK3B	ENSG00000082701	Tier 1	9606.ENSP00000324806	-0.74951	NA
CACNB2	ENSG00000165995	Tier 3A	9606.ENSP00000320025	-0.749708	NA
KEAP1	ENSG00000079999	Tier 1	9606.ENSP00000171111	-0.750718	NA
ALDH4A1	ENSG00000159423	Tier 1	9606.ENSP00000290597	-0.750801	NA
SLCO2A1	ENSG00000174640	Tier 1	9606.ENSP00000311291	-0.75157	NA
GAN	ENSG00000261609	Tier 3B	9606.ENSP00000248272	-0.751631	NA
ELAVL1	ENSG00000066044	Tier 2	9606.ENSP00000385269	-0.75282	NA
NGFR	ENSG00000064300	Tier 1	9606.ENSP00000172229	-0.753073	NA
LTA	ENSG00000226979	Tier 1	9606.ENSP00000403495	-0.753263	NA
CRISP3	ENSG00000096006	Tier 3B	9606.ENSP00000389026	-0.753362	NA
GSTT1	ENSG00000184674	Tier 1	9606.ENSP00000248935	-0.753448	NA
KLHL25	ENSG00000183655	Tier 3B	9606.ENSP00000336800	-0.753669	NA
FKBP5	ENSG00000096060	Tier 1	9606.ENSP00000338160	-0.754441	NA
IL1B	ENSG00000125538	Tier 1	9606.ENSP00000263341	-0.75612	NA
TNFRSF14	ENSG00000157873	Tier 3A	9606.ENSP00000347948	-0.756318	NA
TMED9	ENSG00000184840	Tier 3A	9606.ENSP00000330945	-0.757255	NA
PLAA	ENSG00000137055	Tier 2	9606.ENSP00000380460	-0.757661	NA
ANPEP	ENSG00000166825	Tier 2	9606.ENSP00000300060	-0.758429	NA
KLHL21	ENSG00000162413	Tier 3B	9606.ENSP00000366886	-0.758718	NA
IPP	ENSG00000197429	Tier 3B	9606.ENSP00000379739	-0.759155	NA
TRPV4	ENSG00000111199	Tier 2	9606.ENSP00000261740	-0.760024	NA
APOA1	ENSG00000118137	Tier 3A	9606.ENSP00000236850	-0.760775	NA
KLHL26	ENSG00000167487	Tier 3B	9606.ENSP00000300976	-0.76115	NA
WNT2	ENSG00000105989	Tier 3A	9606.ENSP00000265441	-0.761608	NA
NOD1	ENSG00000106100	Tier 2	9606.ENSP00000222823	-0.761951	NA
CA9	ENSG00000107159	Tier 1	9606.ENSP00000367608	-0.762156	NA
GALNT2	ENSG00000143641	Tier 3A	9606.ENSP00000355632	-0.762452	NA
HMGB1	ENSG00000189403	Tier 3A	9606.ENSP00000343040	-0.762516	NA
HABP4	ENSG00000130956	Tier 3B	9606.ENSP00000364398	-0.762648	NA
WISP2	ENSG00000064205	Tier 3A	9606.ENSP00000190983	-0.76513	NA
IFIT1	ENSG00000185745	Tier 3B	9606.ENSP00000360869	-0.765736	NA
NR2F6	ENSG00000160113	Tier 3A	9606.ENSP00000291442	-0.767342	NA
GABRG2	ENSG00000113327	Tier 1	9606.ENSP00000410732	-0.76849	NA
PAK4	ENSG00000130669	Tier 1	9606.ENSP00000351049	-0.769156	NA
CTRL	ENSG00000141086	Tier 3A	9606.ENSP00000458537	-0.770636	NA
KLHL12	ENSG00000117153	Tier 3B	9606.ENSP00000356230	-0.771568	NA
VCP	ENSG00000165280	Tier 2	9606.ENSP00000351777	-0.772271	NA
CNP	ENSG00000173786	Tier 3B	9606.ENSP00000377470	-0.772388	NA
ANGPT1	ENSG00000154188	Tier 1	9606.ENSP00000428340	-0.773085	NA
SNAP25	ENSG00000132639	Tier 1	9606.ENSP00000254976	-0.774112	NA
ADRB1	ENSG00000043591	Tier 1	9606.ENSP00000358301	-0.774683	NA
TFF1	ENSG00000160182	Tier 3A	9606.ENSP00000291527	-0.775469	NA
MYH7	ENSG00000092054	Tier 1	9606.ENSP00000347507	-0.776152	NA
RNASE2	ENSG00000169385	Tier 3B	9606.ENSP00000303276	-0.776491	NA
MAPK1	ENSG00000100030	Tier 1	9606.ENSP00000215832	-0.777171	NA
MLX	ENSG00000108788	Tier 2	9606.ENSP00000246912	-0.777398	NA
KCNN4	ENSG00000104783	Tier 1	9606.ENSP00000262888	-0.780158	NA
PTPN12	ENSG00000127947	Tier 2	9606.ENSP00000248594	-0.780402	NA
RPTN	ENSG00000215853	Tier 3A	9606.ENSP00000317895	-0.780867	NA
TNFRSF10A	ENSG00000104689	Tier 1	9606.ENSP00000221132	-0.781413	NA
DAG1	ENSG00000173402	Tier 3B	9606.ENSP00000312435	-0.782643	NA
ACVR1	ENSG00000115170	Tier 1	9606.ENSP00000263640	-0.783973	NA
AKR1C2	ENSG00000151632	Tier 2	9606.ENSP00000370129	-0.784512	NA
SENP6	ENSG00000112701	Tier 2	9606.ENSP00000402527	-0.786337	NA
IL12B	ENSG00000113302	Tier 1	9606.ENSP00000231228	-0.786719	NA
PTGS1	ENSG00000095303	Tier 1	9606.ENSP00000354612	-0.787299	NA
GALK1	ENSG00000108479	Tier 2	9606.ENSP00000225614	-0.787478	NA
ADAMTSL4	ENSG00000143382	Tier 3B	9606.ENSP00000271643	-0.787752	NA
USP2	ENSG00000036672	Tier 2	9606.ENSP00000260187	-0.788801	NA
TNC	ENSG00000041982	Tier 1	9606.ENSP00000265131	-0.78917	NA
GH1	ENSG00000259384	Tier 3A	9606.ENSP00000312673	-0.789192	NA
PDGFB	ENSG00000100311	Tier 3A	9606.ENSP00000330382	-0.789696	NA
CHAT	ENSG00000070748	Tier 1	9606.ENSP00000337103	-0.79007	NA
ASIC1	ENSG00000110881	Tier 2	9606.ENSP00000228468	-0.790113	NA
PEPD	ENSG00000124299	Tier 2	9606.ENSP00000244137	-0.790272	NA
MASTL	ENSG00000120539	Tier 3B	9606.ENSP00000365107	-0.790358	NA
ACPP	ENSG00000014257	Tier 2	9606.ENSP00000323036	-0.790691	NA
BMP6	ENSG00000153162	Tier 3A	9606.ENSP00000283147	-0.790838	NA
ANGPT2	ENSG00000091879	Tier 1	9606.ENSP00000314897	-0.791868	NA
CYP2B6	ENSG00000197408	Tier 1	9606.ENSP00000324648	-0.79239	NA
SLCO1A2	ENSG00000084453	Tier 1	9606.ENSP00000305974	-0.793007	NA
CHIA	ENSG00000134216	Tier 2	9606.ENSP00000341828	-0.793024	NA
NTRK3	ENSG00000140538	Tier 1	9606.ENSP00000354207	-0.794061	NA
STK24	ENSG00000102572	Tier 1	9606.ENSP00000365730	-0.794139	NA
BIRC2	ENSG00000110330	Tier 1	9606.ENSP00000227758	-0.794737	NA
CFTR	ENSG00000001626	Tier 1	9606.ENSP00000003084	-0.795541	NA
SUMF1	ENSG00000144455	Tier 3A	9606.ENSP00000272902	-0.797004	NA
DCPS	ENSG00000110063	Tier 1	9606.ENSP00000263579	-0.797954	NA
PTPN7	ENSG00000143851	Tier 1	9606.ENSP00000309116	-0.799716	NA
PPWD1	ENSG00000113593	Tier 3B	9606.ENSP00000261308	-0.80015	NA
CTDSP1	ENSG00000144579	Tier 2	9606.ENSP00000273062	-0.800237	NA
THRB	ENSG00000151090	Tier 1	9606.ENSP00000348827	-0.800454	NA
CNGA4	ENSG00000132259	Tier 3B	9606.ENSP00000369268	-0.800519	NA
LIPA	ENSG00000107798	Tier 2	9606.ENSP00000337354	-0.800738	NA
NR6A1	ENSG00000148200	Tier 3B	9606.ENSP00000420267	-0.800746	NA
MYH6	ENSG00000197616	Tier 1	9606.ENSP00000348634	-0.801075	NA
SLC12A6	ENSG00000140199	Tier 3B	9606.ENSP00000452776	-0.801706	NA
KLHL36	ENSG00000135686	Tier 3B	9606.ENSP00000456743	-0.801877	NA
AMOT	ENSG00000126016	Tier 3B	9606.ENSP00000361027	-0.802167	NA
PLIN2	ENSG00000147872	Tier 3B	9606.ENSP00000276914	-0.802536	NA
MSTN	ENSG00000138379	Tier 1	9606.ENSP00000260950	-0.802642	NA
BMPR1B	ENSG00000138696	Tier 1	9606.ENSP00000264568	-0.802863	NA
RAF1	ENSG00000132155	Tier 1	9606.ENSP00000251849	-0.802903	NA
MDK	ENSG00000110492	Tier 3A	9606.ENSP00000352852	-0.803679	NA
NR2C1	ENSG00000120798	Tier 3B	9606.ENSP00000333275	-0.803729	NA
PAK6	ENSG00000137843	Tier 1	9606.ENSP00000260404	-0.804208	NA
WNT9A	ENSG00000143816	Tier 3B	9606.ENSP00000272164	-0.805047	NA
KYNU	ENSG00000115919	Tier 2	9606.ENSP00000264170	-0.805753	NA
NODAL	ENSG00000156574	Tier 3B	9606.ENSP00000287139	-0.805933	NA
PTPN22	ENSG00000134242	Tier 2	9606.ENSP00000352833	-0.806336	NA
GPR25	ENSG00000170128	Tier 3B	9606.ENSP00000301917	-0.806574	NA
TNFRSF21	ENSG00000146072	Tier 3A	9606.ENSP00000296861	-0.806718	NA
FOLR3	ENSG00000110203	Tier 3B	9606.ENSP00000399235	-0.807442	NA
EP300	ENSG00000100393	Tier 2	9606.ENSP00000263253	-0.810209	NA
PRDX4	ENSG00000123131	Tier 3B	9606.ENSP00000368646	-0.811301	NA
CYP27B1	ENSG00000111012	Tier 1	9606.ENSP00000228606	-0.811498	NA
COL11A2	ENSG00000204248	Tier 3A	9606.ENSP00000363840	-0.812561	NA
FGF23	ENSG00000118972	Tier 3B	9606.ENSP00000237837	-0.813689	NA
STS	ENSG00000101846	Tier 1	9606.ENSP00000217961	-0.814323	NA
ENC1	ENSG00000171617	Tier 3B	9606.ENSP00000306356	-0.814383	NA
SLC2A4	ENSG00000181856	Tier 1	9606.ENSP00000320935	-0.814444	NA
NLGN3	ENSG00000196338	Tier 3B	9606.ENSP00000351591	-0.814598	NA
GRIN3B	ENSG00000116032	Tier 1	9606.ENSP00000234389	-0.814762	NA
QDPR	ENSG00000151552	Tier 2	9606.ENSP00000281243	-0.814924	NA
CAMP	ENSG00000164047	Tier 3B	9606.ENSP00000458149	-0.815812	NA
ATG4C	ENSG00000125703	Tier 3B	9606.ENSP00000322159	-0.816699	NA
CYP26C1	ENSG00000187553	Tier 1	9606.ENSP00000285949	-0.818302	NA
PAK3	ENSG00000077264	Tier 1	9606.ENSP00000353864	-0.818546	NA
CD3E	ENSG00000198851	Tier 1	9606.ENSP00000354566	-0.818803	NA
BRPF3	ENSG00000096070	Tier 3B	9606.ENSP00000350267	-0.819728	NA
CDH13	ENSG00000140945	Tier 3A	9606.ENSP00000408632	-0.820275	NA
ANG	ENSG00000214274	Tier 3B	9606.ENSP00000336762	-0.821516	NA
C1QTNF6	ENSG00000133466	Tier 3A	9606.ENSP00000338812	-0.821909	NA
LTBP1	ENSG00000049323	Tier 3A	9606.ENSP00000386043	-0.823706	NA
LTBR	ENSG00000111321	Tier 1	9606.ENSP00000228918	-0.824286	NA
SPHK1	ENSG00000176170	Tier 2	9606.ENSP00000313681	-0.824709	NA
FGF4	ENSG00000075388	Tier 1	9606.ENSP00000168712	-0.825157	NA
USP7	ENSG00000187555	Tier 2	9606.ENSP00000343535	-0.825224	NA
SAMD1	ENSG00000141858	Tier 3B	9606.ENSP00000431971	-0.825901	NA
KLHL30	ENSG00000168427	Tier 3B	9606.ENSP00000386389	-0.826588	NA
SCUBE3	ENSG00000146197	Tier 3B	9606.ENSP00000274938	-0.826878	NA
PI16	ENSG00000164530	Tier 3A	9606.ENSP00000362778	-0.82705	NA
DERL1	ENSG00000136986	Tier 3B	9606.ENSP00000259512	-0.827322	NA
H1F0	ENSG00000189060	Tier 1	9606.ENSP00000344504	-0.827551	NA
SLC22A3	ENSG00000146477	Tier 1	9606.ENSP00000275300	-0.828475	NA
SLC22A12	ENSG00000197891	Tier 1	9606.ENSP00000366797	-0.828868	NA
EFNB1	ENSG00000090776	Tier 3B	9606.ENSP00000204961	-0.83152	NA
KDM5C	ENSG00000126012	Tier 2	9606.ENSP00000364550	-0.831791	NA
APH1B	ENSG00000138613	Tier 1	9606.ENSP00000261879	-0.831879	NA
PSEN1	ENSG00000080815	Tier 1	9606.ENSP00000326366	-0.832799	NA
WNT16	ENSG00000002745	Tier 3A	9606.ENSP00000222462	-0.833314	NA
NAMPT	ENSG00000105835	Tier 2	9606.ENSP00000222553	-0.833943	NA
VEGFC	ENSG00000150630	Tier 3B	9606.ENSP00000280193	-0.834286	NA
WNT2B	ENSG00000134245	Tier 3B	9606.ENSP00000358698	-0.835097	NA
IL6ST	ENSG00000134352	Tier 1	9606.ENSP00000338799	-0.835256	NA
MAP4K5	ENSG00000012983	Tier 1	9606.ENSP00000013125	-0.836336	NA
STK25	ENSG00000115694	Tier 1	9606.ENSP00000325748	-0.836446	NA
LEFTY2	ENSG00000143768	Tier 3B	9606.ENSP00000355785	-0.837235	NA
AGGF1	ENSG00000164252	Tier 3B	9606.ENSP00000316109	-0.838467	NA
PSMB6	ENSG00000142507	Tier 3B	9606.ENSP00000270586	-0.839929	NA
FKBP1A	ENSG00000088832	Tier 1	9606.ENSP00000371138	-0.840838	NA
SSR1	ENSG00000124783	Tier 3A	9606.ENSP00000244763	-0.841005	NA
ELANE	ENSG00000197561	Tier 1	9606.ENSP00000263621	-0.841147	NA
ESRRA	ENSG00000173153	Tier 1	9606.ENSP00000000442	-0.841491	NA
BICD1	ENSG00000151746	Tier 3A	9606.ENSP00000281474	-0.841948	NA
ANGPTL4	ENSG00000167772	Tier 3A	9606.ENSP00000301455	-0.842213	NA
COL1A2	ENSG00000164692	Tier 3A	9606.ENSP00000297268	-0.842534	NA
SREBF2	ENSG00000198911	Tier 2	9606.ENSP00000354476	-0.842639	NA
DNMT3A	ENSG00000119772	Tier 1	9606.ENSP00000264709	-0.842907	NA
TF	ENSG00000091513	Tier 3A	9606.ENSP00000385834	-0.843662	NA
ACVR1C	ENSG00000123612	Tier 3B	9606.ENSP00000243349	-0.843744	NA
CSNK2A2	ENSG00000070770	Tier 2	9606.ENSP00000262506	-0.843937	NA
TDP1	ENSG00000042088	Tier 1	9606.ENSP00000337353	-0.843995	NA
VDR	ENSG00000111424	Tier 1	9606.ENSP00000447173	-0.844532	NA
LYZL4	ENSG00000157093	Tier 3A	9606.ENSP00000287748	-0.845387	NA
ADAMTSL3	ENSG00000156218	Tier 3A	9606.ENSP00000286744	-0.847341	NA
EPDR1	ENSG00000086289	Tier 3A	9606.ENSP00000453973	-0.84869	NA
MVD	ENSG00000167508	Tier 2	9606.ENSP00000301012	-0.84915	NA
SCD5	ENSG00000145284	Tier 2	9606.ENSP00000316329	-0.849381	NA
ALDH5A1	ENSG00000112294	Tier 1	9606.ENSP00000314649	-0.85138	NA
MFAP4	ENSG00000166482	Tier 3B	9606.ENSP00000378957	-0.851402	NA
CPQ	ENSG00000104324	Tier 3A	9606.ENSP00000220763	-0.852331	NA
STAT5B	ENSG00000173757	Tier 2	9606.ENSP00000293328	-0.85275	NA
ITGAV	ENSG00000138448	Tier 1	9606.ENSP00000261023	-0.85359	NA
MAPK7	ENSG00000166484	Tier 2	9606.ENSP00000311005	-0.853615	NA
IL17F	ENSG00000112116	Tier 1	9606.ENSP00000337432	-0.854165	NA
PSMA8	ENSG00000154611	Tier 3B	9606.ENSP00000311121	-0.854281	NA
APP	ENSG00000142192	Tier 1	9606.ENSP00000284981	-0.855473	NA
FGF5	ENSG00000138675	Tier 3A	9606.ENSP00000311697	-0.855515	NA
IL17A	ENSG00000112115	Tier 1	9606.ENSP00000344192	-0.855923	NA
OVGP1	ENSG00000085465	Tier 3B	9606.ENSP00000358747	-0.85611	NA
PI3	ENSG00000124102	Tier 3B	9606.ENSP00000243924	-0.856272	NA
MBTPS1	ENSG00000140943	Tier 2	9606.ENSP00000344223	-0.856392	NA
FASLG	ENSG00000117560	Tier 3B	9606.ENSP00000356694	-0.857067	NA
TNFRSF10C	ENSG00000173535	Tier 3B	9606.ENSP00000349324	-0.858182	NA
TBXA2R	ENSG00000006638	Tier 1	9606.ENSP00000393333	-0.858523	NA
FDPS	ENSG00000160752	Tier 1	9606.ENSP00000349078	-0.858702	NA
CDK10	ENSG00000185324	Tier 3B	9606.ENSP00000338673	-0.859194	NA
IL2RA	ENSG00000134460	Tier 1	9606.ENSP00000369293	-0.862011	NA
LMTK3	ENSG00000142235	Tier 3B	9606.ENSP00000270238	-0.862362	NA
IL9	ENSG00000145839	Tier 1	9606.ENSP00000274520	-0.862425	NA
INHBB	ENSG00000163083	Tier 3A	9606.ENSP00000295228	-0.863907	NA
TSLP	ENSG00000145777	Tier 1	9606.ENSP00000339804	-0.864026	NA
GLB1	ENSG00000170266	Tier 2	9606.ENSP00000306920	-0.86417	NA
TNFRSF8	ENSG00000120949	Tier 1	9606.ENSP00000263932	-0.864489	NA
HNF4G	ENSG00000164749	Tier 3B	9606.ENSP00000379701	-0.864694	NA
BCL2L10	ENSG00000137875	Tier 2	9606.ENSP00000260442	-0.865788	NA
SFRP4	ENSG00000106483	Tier 3A	9606.ENSP00000410715	-0.86632	NA
PCSK9	ENSG00000169174	Tier 1	9606.ENSP00000303208	-0.866328	NA
HSD11B2	ENSG00000176387	Tier 1	9606.ENSP00000316786	-0.866356	NA
FGF9	ENSG00000102678	Tier 3A	9606.ENSP00000371790	-0.866361	NA
FABP4	ENSG00000170323	Tier 2	9606.ENSP00000256104	-0.866387	NA
NNMT	ENSG00000166741	Tier 1	9606.ENSP00000299964	-0.866616	NA
AEBP1	ENSG00000106624	Tier 3A	9606.ENSP00000223357	-0.867216	NA
CYP46A1	ENSG00000036530	Tier 1	9606.ENSP00000261835	-0.86816	NA
AMPD1	ENSG00000116748	Tier 2	9606.ENSP00000430075	-0.868206	NA
S100A8	ENSG00000143546	Tier 3B	9606.ENSP00000357721	-0.872676	NA
CRIM1	ENSG00000150938	Tier 3A	9606.ENSP00000280527	-0.872902	NA
NAALAD2	ENSG00000077616	Tier 2	9606.ENSP00000432481	-0.873187	NA
TNNT2	ENSG00000118194	Tier 2	9606.ENSP00000356286	-0.873431	NA
ACVR1B	ENSG00000135503	Tier 1	9606.ENSP00000442656	-0.875783	NA
CTSH	ENSG00000103811	Tier 2	9606.ENSP00000220166	-0.876444	NA
UGT2B17	ENSG00000197888	Tier 1	9606.ENSP00000320401	-0.876579	NA
GNRHR	ENSG00000109163	Tier 1	9606.ENSP00000226413	-0.87662	NA
NRBP1	ENSG00000115216	Tier 3B	9606.ENSP00000233557	-0.876797	NA
TULP1	ENSG00000112041	Tier 3A	9606.ENSP00000229771	-0.877322	NA
H6PD	ENSG00000049239	Tier 3B	9606.ENSP00000366620	-0.87767	NA
SFTPC	ENSG00000168484	Tier 3A	9606.ENSP00000316152	-0.877675	NA
ENPEP	ENSG00000138792	Tier 2	9606.ENSP00000265162	-0.878238	NA
LGALS1	ENSG00000100097	Tier 3B	9606.ENSP00000215909	-0.879817	NA
CCNE1	ENSG00000105173	Tier 1	9606.ENSP00000262643	-0.880517	NA
KBTBD6	ENSG00000165572	Tier 3B	9606.ENSP00000368799	-0.882198	NA
TLK1	ENSG00000198586	Tier 2	9606.ENSP00000411099	-0.882257	NA
TNFRSF10B	ENSG00000120889	Tier 1	9606.ENSP00000276431	-0.88345	NA
COMP	ENSG00000105664	Tier 3B	9606.ENSP00000222271	-0.883642	NA
LGALS7B	ENSG00000178934	Tier 3B	9606.ENSP00000313571	-0.88366	NA
CTF1	ENSG00000150281	Tier 3A	9606.ENSP00000279804	-0.883726	NA
CD2	ENSG00000116824	Tier 1	9606.ENSP00000358490	-0.88381	NA
KLHL40	ENSG00000157119	Tier 3B	9606.ENSP00000287777	-0.885075	NA
FGF6	ENSG00000111241	Tier 3B	9606.ENSP00000228837	-0.885686	NA
IKBKG	ENSG00000073009	Tier 2	9606.ENSP00000358622	-0.885959	NA
ATG4B	ENSG00000168397	Tier 2	9606.ENSP00000384259	-0.88636	NA
TNFSF13B	ENSG00000102524	Tier 1	9606.ENSP00000365048	-0.888138	NA
BMP2K	ENSG00000138756	Tier 1	9606.ENSP00000334836	-0.888295	NA
PTPRZ1	ENSG00000106278	Tier 3B	9606.ENSP00000377047	-0.889892	NA
SCNN1B	ENSG00000168447	Tier 2	9606.ENSP00000345751	-0.889981	NA
TGFBR2	ENSG00000163513	Tier 1	9606.ENSP00000351905	-0.890426	NA
TMPRSS11D	ENSG00000153802	Tier 2	9606.ENSP00000283916	-0.891271	NA
CLCN5	ENSG00000171365	Tier 3B	9606.ENSP00000365256	-0.893326	NA
PAK7	ENSG00000101349	Tier 1	9606.ENSP00000322957	-0.893696	NA
MAP4K1	ENSG00000104814	Tier 1	9606.ENSP00000380066	-0.895072	NA
LAMP1	ENSG00000185896	Tier 3A	9606.ENSP00000333298	-0.897583	NA
PLAT	ENSG00000104368	Tier 1	9606.ENSP00000220809	-0.898922	NA
SMPD1	ENSG00000166311	Tier 3B	9606.ENSP00000340409	-0.899352	NA
AAK1	ENSG00000115977	Tier 1	9606.ENSP00000386456	-0.899379	NA
ACR	ENSG00000100312	Tier 2	9606.ENSP00000216139	-0.899387	NA
ADCK3	ENSG00000163050	Tier 2	9606.ENSP00000355739	-0.899787	NA
ICOS	ENSG00000163600	Tier 1	9606.ENSP00000319476	-0.900232	NA
TLK2	ENSG00000146872	Tier 1	9606.ENSP00000275780	-0.900523	NA
KBTBD11	ENSG00000176595	Tier 3B	9606.ENSP00000321544	-0.900523	NA
SNAP23	ENSG00000092531	Tier 2	9606.ENSP00000249647	-0.901279	NA
HDAC7	ENSG00000061273	Tier 1	9606.ENSP00000080059	-0.901503	NA
CASP8	ENSG00000064012	Tier 1	9606.ENSP00000351273	-0.90296	NA
ACP1	ENSG00000143727	Tier 2	9606.ENSP00000272065	-0.903169	NA
PSMA2	ENSG00000106588	Tier 3B	9606.ENSP00000223321	-0.903335	NA
SCNN1G	ENSG00000166828	Tier 2	9606.ENSP00000300061	-0.906991	NA
CHRNA1	ENSG00000138435	Tier 1	9606.ENSP00000261007	-0.907846	NA
DNPEP	ENSG00000123992	Tier 2	9606.ENSP00000273075	-0.908252	NA
PTGDR	ENSG00000168229	Tier 1	9606.ENSP00000303424	-0.908283	NA
OPN3	ENSG00000054277	Tier 3B	9606.ENSP00000355512	-0.908881	NA
CD3D	ENSG00000167286	Tier 3B	9606.ENSP00000300692	-0.909025	NA
NEK4	ENSG00000114904	Tier 2	9606.ENSP00000233027	-0.909281	NA
MCOLN1	ENSG00000090674	Tier 3B	9606.ENSP00000264079	-0.909482	NA
GSTM1	ENSG00000134184	Tier 1	9606.ENSP00000311469	-0.910081	NA
AKR1B1	ENSG00000085662	Tier 1	9606.ENSP00000285930	-0.911491	NA
INHA	ENSG00000123999	Tier 3B	9606.ENSP00000243786	-0.912586	NA
CPXM2	ENSG00000121898	Tier 3B	9606.ENSP00000241305	-0.913162	NA
MYO3B	ENSG00000071909	Tier 2	9606.ENSP00000386213	-0.913457	NA
CCNE2	ENSG00000175305	Tier 1	9606.ENSP00000309181	-0.913749	NA
GMNN	ENSG00000112312	Tier 1	9606.ENSP00000230056	-0.9138	NA
SOGA1	ENSG00000149639	Tier 3B	9606.ENSP00000237536	-0.914398	NA
CELSR2	ENSG00000143126	Tier 3B	9606.ENSP00000271332	-0.914415	NA
ITGA7	ENSG00000135424	Tier 3A	9606.ENSP00000452120	-0.914561	NA
VCAM1	ENSG00000162692	Tier 2	9606.ENSP00000294728	-0.915002	NA
ITGA6	ENSG00000091409	Tier 3A	9606.ENSP00000386896	-0.915057	NA
COMT	ENSG00000093010	Tier 1	9606.ENSP00000354511	-0.915377	NA
PLA2G4A	ENSG00000116711	Tier 1	9606.ENSP00000356436	-0.915782	NA
VWA1	ENSG00000179403	Tier 3B	9606.ENSP00000417185	-0.916458	NA
KDM4E	ENSG00000235268	Tier 2	9606.ENSP00000397239	-0.917084	NA
SLC15A2	ENSG00000163406	Tier 1	9606.ENSP00000417085	-0.917155	NA
TFF3	ENSG00000160180	Tier 3A	9606.ENSP00000430690	-0.917665	NA
CDKL2	ENSG00000138769	Tier 1	9606.ENSP00000412365	-0.917738	NA
DHFRL1	ENSG00000178700	Tier 2	9606.ENSP00000319170	-0.918139	NA
CFC1	ENSG00000136698	Tier 3B	9606.ENSP00000259216	-0.918256	NA
ABCA4	ENSG00000198691	Tier 1	9606.ENSP00000359245	-0.918664	NA
FZD10	ENSG00000111432	Tier 3A	9606.ENSP00000229030	-0.919397	NA
IL21	ENSG00000138684	Tier 3A	9606.ENSP00000264497	-0.92027	NA
KLHL18	ENSG00000114648	Tier 3B	9606.ENSP00000232766	-0.920898	NA
DHRS9	ENSG00000073737	Tier 1	9606.ENSP00000316670	-0.921665	NA
CPM	ENSG00000135678	Tier 2	9606.ENSP00000339157	-0.92186	NA
AKR1B10	ENSG00000198074	Tier 1	9606.ENSP00000352584	-0.922577	NA
TK2	ENSG00000166548	Tier 2	9606.ENSP00000414334	-0.923461	NA
NLGN4X	ENSG00000146938	Tier 3B	9606.ENSP00000275857	-0.924116	NA
KLHL1	ENSG00000150361	Tier 3B	9606.ENSP00000367075	-0.924228	NA
PDE2A	ENSG00000186642	Tier 2	9606.ENSP00000334910	-0.924359	NA
KLHL7	ENSG00000122550	Tier 3B	9606.ENSP00000343273	-0.925032	NA
EGFL7	ENSG00000172889	Tier 1	9606.ENSP00000307843	-0.925252	NA
GGT1	ENSG00000100031	Tier 3A	9606.ENSP00000248923	-0.925339	NA
WNK2	ENSG00000165238	Tier 3B	9606.ENSP00000297954	-0.926689	NA
EIF4A1	ENSG00000161960	Tier 2	9606.ENSP00000293831	-0.927313	NA
SCD	ENSG00000099194	Tier 2	9606.ENSP00000359380	-0.928223	NA
TCN1	ENSG00000134827	Tier 3A	9606.ENSP00000257264	-0.928508	NA
DMPK	ENSG00000104936	Tier 1	9606.ENSP00000345997	-0.930042	NA
CHST12	ENSG00000136213	Tier 1	9606.ENSP00000258711	-0.931791	NA
ACE	ENSG00000159640	Tier 1	9606.ENSP00000290866	-0.932186	NA
GLO1	ENSG00000124767	Tier 2	9606.ENSP00000362463	-0.933565	NA
CAMKK1	ENSG00000004660	Tier 1	9606.ENSP00000158166	-0.933654	NA
PLAC1	ENSG00000170965	Tier 3B	9606.ENSP00000352173	-0.933781	NA
MUC1	ENSG00000185499	Tier 1	9606.ENSP00000357380	-0.933873	NA
CYP17A1	ENSG00000148795	Tier 1	9606.ENSP00000358903	-0.935141	NA
COL22A1	ENSG00000169436	Tier 3B	9606.ENSP00000303153	-0.935301	NA
HIPK4	ENSG00000160396	Tier 1	9606.ENSP00000291823	-0.93568	NA
DCD	ENSG00000161634	Tier 3A	9606.ENSP00000293371	-0.936777	NA
CD300A	ENSG00000167851	Tier 3B	9606.ENSP00000353259	-0.936974	NA
TSPAN7	ENSG00000156298	Tier 3B	9606.ENSP00000367743	-0.937643	NA
CYP11B2	ENSG00000179142	Tier 1	9606.ENSP00000325822	-0.93797	NA
PTPRF	ENSG00000142949	Tier 2	9606.ENSP00000353030	-0.93915	NA
MAP4K2	ENSG00000168067	Tier 1	9606.ENSP00000294066	-0.939195	NA
SCT	ENSG00000070031	Tier 3A	9606.ENSP00000176195	-0.939854	NA
IL4R	ENSG00000077238	Tier 1	9606.ENSP00000170630	-0.94001	NA
BAD	ENSG00000002330	Tier 2	9606.ENSP00000309103	-0.940282	NA
MME	ENSG00000196549	Tier 1	9606.ENSP00000353679	-0.940368	NA
MAP3K12	ENSG00000139625	Tier 1	9606.ENSP00000448689	-0.941045	NA
MATN3	ENSG00000132031	Tier 3A	9606.ENSP00000383894	-0.941845	NA
FGF19	ENSG00000162344	Tier 3B	9606.ENSP00000294312	-0.942116	NA
EPX	ENSG00000121053	Tier 3B	9606.ENSP00000225371	-0.942163	NA
PI15	ENSG00000137558	Tier 3B	9606.ENSP00000260113	-0.942224	NA
KLK3	ENSG00000142515	Tier 2	9606.ENSP00000314151	-0.943294	NA
FBLN7	ENSG00000144152	Tier 3B	9606.ENSP00000331411	-0.943963	NA
FGF3	ENSG00000186895	Tier 3A	9606.ENSP00000334122	-0.944662	NA
UCHL3	ENSG00000118939	Tier 2	9606.ENSP00000366819	-0.945046	NA
ITGAE	ENSG00000083457	Tier 1	9606.ENSP00000263087	-0.945276	NA
RORB	ENSG00000198963	Tier 3B	9606.ENSP00000366093	-0.94551	NA
TBXAS1	ENSG00000059377	Tier 1	9606.ENSP00000389414	-0.946061	NA
CYP8B1	ENSG00000180432	Tier 1	9606.ENSP00000318867	-0.946353	NA
SLC1A2	ENSG00000110436	Tier 2	9606.ENSP00000278379	-0.946516	NA
STAT1	ENSG00000115415	Tier 2	9606.ENSP00000354394	-0.947207	NA
THBD	ENSG00000178726	Tier 3B	9606.ENSP00000366307	-0.948372	NA
PTHLH	ENSG00000087494	Tier 1	9606.ENSP00000379213	-0.949154	NA
VIM	ENSG00000026025	Tier 1	9606.ENSP00000224237	-0.951367	NA
CCRL2	ENSG00000121797	Tier 3B	9606.ENSP00000349967	-0.952934	NA
LGALS3BP	ENSG00000108679	Tier 3B	9606.ENSP00000262776	-0.953282	NA
CCNA2	ENSG00000145386	Tier 1	9606.ENSP00000274026	-0.953757	NA
EEF2K	ENSG00000103319	Tier 2	9606.ENSP00000263026	-0.95382	NA
PARP1	ENSG00000143799	Tier 1	9606.ENSP00000355759	-0.953864	NA
HEPHL1	ENSG00000181333	Tier 3B	9606.ENSP00000313699	-0.954035	NA
ADAMTS6	ENSG00000049192	Tier 3A	9606.ENSP00000370443	-0.954123	NA
GDF3	ENSG00000184344	Tier 3B	9606.ENSP00000331745	-0.954181	NA
DPP8	ENSG00000074603	Tier 2	9606.ENSP00000339208	-0.954271	NA
LGALS9	ENSG00000168961	Tier 3B	9606.ENSP00000378856	-0.9543	NA
FUCA1	ENSG00000179163	Tier 2	9606.ENSP00000363603	-0.954566	NA
PLAUR	ENSG00000011422	Tier 2	9606.ENSP00000339328	-0.955233	NA
CDH3	ENSG00000062038	Tier 1	9606.ENSP00000264012	-0.955369	NA
CHRNE	ENSG00000108556	Tier 1	9606.ENSP00000293780	-0.955483	NA
BCL2L2-PABPN1	ENSG00000258643	Tier 2	9606.ENSP00000451320	-0.955725	NA
PIP4K2B	ENSG00000141720	Tier 1	9606.ENSP00000269554	-0.955975	NA
GPR37	ENSG00000170775	Tier 3B	9606.ENSP00000306449	-0.956254	NA
TK1	ENSG00000167900	Tier 1	9606.ENSP00000301634	-0.956568	NA
HDGF	ENSG00000143321	Tier 3A	9606.ENSP00000357189	-0.956663	NA
SFTPA2	ENSG00000185303	Tier 3B	9606.ENSP00000361400	-0.956804	NA
GPR161	ENSG00000143147	Tier 3B	9606.ENSP00000271357	-0.957152	NA
CELSR3	ENSG00000008300	Tier 3B	9606.ENSP00000164024	-0.957544	NA
NT5E	ENSG00000135318	Tier 1	9606.ENSP00000257770	-0.958356	NA
BRAF	ENSG00000157764	Tier 1	9606.ENSP00000288602	-0.96055	NA
SCNN1D	ENSG00000162572	Tier 3A	9606.ENSP00000368411	-0.960869	NA
TGM2	ENSG00000198959	Tier 2	9606.ENSP00000355330	-0.961048	NA
KLHL35	ENSG00000149243	Tier 3B	9606.ENSP00000438526	-0.961093	NA
CTSG	ENSG00000100448	Tier 2	9606.ENSP00000216336	-0.961307	NA
PPIB	ENSG00000166794	Tier 1	9606.ENSP00000300026	-0.962662	NA
IL1RL1	ENSG00000115602	Tier 3A	9606.ENSP00000233954	-0.963849	NA
GDF1	ENSG00000130283	Tier 3B	9606.ENSP00000247005	-0.964346	NA
ADAMTS12	ENSG00000151388	Tier 3A	9606.ENSP00000422554	-0.964988	NA
SLC47A2	ENSG00000180638	Tier 1	9606.ENSP00000326671	-0.965031	NA
NCAN	ENSG00000130287	Tier 3A	9606.ENSP00000252575	-0.9652	NA
CTSA	ENSG00000064601	Tier 2	9606.ENSP00000361562	-0.965258	NA
SLC47A1	ENSG00000142494	Tier 1	9606.ENSP00000270570	-0.965595	NA
COL2A1	ENSG00000139219	Tier 3A	9606.ENSP00000369889	-0.966403	NA
MRGPRX3	ENSG00000179826	Tier 3B	9606.ENSP00000379571	-0.966819	NA
RBBP9	ENSG00000089050	Tier 2	9606.ENSP00000336866	-0.967634	NA
GAS6	ENSG00000183087	Tier 3B	9606.ENSP00000331831	-0.968413	NA
MTAP	ENSG00000099810	Tier 2	9606.ENSP00000369519	-0.969374	NA
SULT1A1	ENSG00000196502	Tier 1	9606.ENSP00000321988	-0.97013	NA
AGA	ENSG00000038002	Tier 3A	9606.ENSP00000264595	-0.97022	NA
RTN4	ENSG00000115310	Tier 1	9606.ENSP00000337838	-0.970549	NA
ITGA4	ENSG00000115232	Tier 1	9606.ENSP00000380227	-0.971393	NA
RYK	ENSG00000163785	Tier 3B	9606.ENSP00000296084	-0.972047	NA
EPHX2	ENSG00000120915	Tier 1	9606.ENSP00000430269	-0.972623	NA
ALDH1L1	ENSG00000144908	Tier 3B	9606.ENSP00000377083	-0.973027	NA
PSMG3	ENSG00000157778	Tier 2	9606.ENSP00000252329	-0.973287	NA
GGT2	ENSG00000133475	Tier 3B	9606.ENSP00000385721	-0.973581	NA
UGGT1	ENSG00000136731	Tier 3B	9606.ENSP00000259253	-0.973976	NA
TRIO	ENSG00000038382	Tier 3B	9606.ENSP00000339299	-0.97408	NA
FREM3	ENSG00000183090	Tier 3B	9606.ENSP00000332886	-0.975392	NA
S100A13	ENSG00000189171	Tier 3B	9606.ENSP00000344822	-0.976149	NA
IAPP	ENSG00000121351	Tier 1	9606.ENSP00000240652	-0.976308	NA
GRIN3A	ENSG00000198785	Tier 1	9606.ENSP00000355155	-0.976579	NA
BMP5	ENSG00000112175	Tier 3B	9606.ENSP00000359866	-0.976836	NA
NTM	ENSG00000182667	Tier 3A	9606.ENSP00000396722	-0.978005	NA
BAMBI	ENSG00000095739	Tier 3B	9606.ENSP00000364683	-0.978052	NA
DRD1	ENSG00000184845	Tier 1	9606.ENSP00000327652	-0.978173	NA
TNFRSF19	ENSG00000127863	Tier 3A	9606.ENSP00000371693	-0.978778	NA
ICAM3	ENSG00000076662	Tier 1	9606.ENSP00000160262	-0.979076	NA
XPNPEP2	ENSG00000122121	Tier 2	9606.ENSP00000360147	-0.979465	NA
DPT	ENSG00000143196	Tier 3A	9606.ENSP00000356791	-0.979848	NA
CSN3	ENSG00000171209	Tier 3B	9606.ENSP00000304822	-0.979967	NA
CD9	ENSG00000010278	Tier 3A	9606.ENSP00000009180	-0.980145	NA
SI	ENSG00000090402	Tier 1	9606.ENSP00000264382	-0.980438	NA
NOV	ENSG00000136999	Tier 3A	9606.ENSP00000259526	-0.980736	NA
PGR	ENSG00000082175	Tier 1	9606.ENSP00000325120	-0.983067	NA
ATP2B2	ENSG00000157087	Tier 3A	9606.ENSP00000324172	-0.984183	NA
CASP2	ENSG00000106144	Tier 2	9606.ENSP00000312664	-0.985379	NA
TSHR	ENSG00000165409	Tier 1	9606.ENSP00000298171	-0.985531	NA
HILPDA	ENSG00000135245	Tier 3B	9606.ENSP00000257696	-0.9861	NA
PRAME	ENSG00000185686	Tier 1	9606.ENSP00000381726	-0.986484	NA
NUCB2	ENSG00000070081	Tier 3A	9606.ENSP00000436455	-0.986558	NA
WNT5B	ENSG00000111186	Tier 3A	9606.ENSP00000308887	-0.98733	NA
CYR61	ENSG00000142871	Tier 3B	9606.ENSP00000398736	-0.987781	NA
THY1	ENSG00000154096	Tier 3B	9606.ENSP00000284240	-0.987818	NA
HSPG2	ENSG00000142798	Tier 3B	9606.ENSP00000363827	-0.987864	NA
PCDH15	ENSG00000150275	Tier 3A	9606.ENSP00000354950	-0.988096	NA
GFOD2	ENSG00000141098	Tier 3A	9606.ENSP00000268797	-0.988464	NA
ICAM2	ENSG00000108622	Tier 3B	9606.ENSP00000388666	-0.992	NA
PIP4K2C	ENSG00000166908	Tier 2	9606.ENSP00000347032	-0.992112	NA
EGLN3	ENSG00000129521	Tier 1	9606.ENSP00000250457	-0.992146	NA
PDE4D	ENSG00000113448	Tier 1	9606.ENSP00000345502	-0.99386	NA
KLHL38	ENSG00000175946	Tier 3B	9606.ENSP00000321475	-0.994493	NA
PIGR	ENSG00000162896	Tier 3B	9606.ENSP00000348888	-0.995647	NA
CYB5R3	ENSG00000100243	Tier 1	9606.ENSP00000354468	-0.995762	NA
F12	ENSG00000131187	Tier 3A	9606.ENSP00000253496	-0.995896	NA
TYR	ENSG00000077498	Tier 1	9606.ENSP00000263321	-0.995977	NA
TRPM8	ENSG00000144481	Tier 1	9606.ENSP00000323926	-0.996508	NA
DEFB127	ENSG00000088782	Tier 3A	9606.ENSP00000371825	-0.99737	NA
IL8	ENSG00000169429	Tier 1	9606.ENSP00000306512	-0.997655	NA
GRIN1	ENSG00000176884	Tier 1	9606.ENSP00000360608	-0.997685	NA
CD8A	ENSG00000153563	Tier 3A	9606.ENSP00000283635	-0.998021	NA
CDA	ENSG00000158825	Tier 1	9606.ENSP00000364212	-0.998697	NA
CA10	ENSG00000154975	Tier 3B	9606.ENSP00000285273	-0.999565	NA
PVR	ENSG00000073008	Tier 3A	9606.ENSP00000402060	-0.999897	NA
AMH	ENSG00000104899	Tier 3A	9606.ENSP00000221496	-0.999909	NA
ADAMDEC1	ENSG00000134028	Tier 3B	9606.ENSP00000256412	-1.00027	NA
DLK1	ENSG00000185559	Tier 1	9606.ENSP00000340292	-1.00058	NA
HIPK1	ENSG00000163349	Tier 1	9606.ENSP00000358571	-1.00063	NA
IGF1	ENSG00000017427	Tier 1	9606.ENSP00000302665	-1.00064	NA
PKD2L2	ENSG00000078795	Tier 3B	9606.ENSP00000290431	-1.0009	NA
KLHL4	ENSG00000102271	Tier 3B	9606.ENSP00000362206	-1.00102	NA
FGF17	ENSG00000158815	Tier 3A	9606.ENSP00000352414	-1.00142	NA
MYO3A	ENSG00000095777	Tier 2	9606.ENSP00000265944	-1.0015	NA
CALCR	ENSG00000004948	Tier 1	9606.ENSP00000352561	-1.00213	NA
GPNMB	ENSG00000136235	Tier 1	9606.ENSP00000371420	-1.00258	NA
CRP	ENSG00000132693	Tier 3A	9606.ENSP00000255030	-1.00282	NA
SLC4A3	ENSG00000114923	Tier 3B	9606.ENSP00000273063	-1.00282	NA
SLCO1C1	ENSG00000139155	Tier 1	9606.ENSP00000370964	-1.00285	NA
ABHD12	ENSG00000100997	Tier 1	9606.ENSP00000365725	-1.00305	NA
CAPZA2	ENSG00000198898	Tier 3A	9606.ENSP00000354947	-1.00321	NA
CYBB	ENSG00000165168	Tier 2	9606.ENSP00000367851	-1.00493	NA
YARS	ENSG00000134684	Tier 2	9606.ENSP00000362576	-1.00656	NA
CYP1A1	ENSG00000140465	Tier 1	9606.ENSP00000369050	-1.00674	NA
BMPR2	ENSG00000204217	Tier 2	9606.ENSP00000363708	-1.00727	NA
VKORC1	ENSG00000167397	Tier 1	9606.ENSP00000378426	-1.00733	NA
TEX14	ENSG00000121101	Tier 3B	9606.ENSP00000240361	-1.00761	NA
DHODH	ENSG00000102967	Tier 1	9606.ENSP00000219240	-1.0079	NA
ABAT	ENSG00000183044	Tier 1	9606.ENSP00000268251	-1.00881	NA
AATK	ENSG00000181409	Tier 3A	9606.ENSP00000324196	-1.00882	NA
AMPD2	ENSG00000116337	Tier 2	9606.ENSP00000256578	-1.01034	NA
GLP1R	ENSG00000112164	Tier 1	9606.ENSP00000362353	-1.01041	NA
PARP3	ENSG00000041880	Tier 2	9606.ENSP00000381740	-1.0118	NA
FZD3	ENSG00000104290	Tier 3B	9606.ENSP00000240093	-1.01181	NA
CCND2	ENSG00000118971	Tier 1	9606.ENSP00000261254	-1.0122	NA
ACACB	ENSG00000076555	Tier 2	9606.ENSP00000341044	-1.01273	NA
SLC22A4	ENSG00000197208	Tier 1	9606.ENSP00000200652	-1.01275	NA
PPAT	ENSG00000128059	Tier 1	9606.ENSP00000264220	-1.01357	NA
CD37	ENSG00000104894	Tier 1	9606.ENSP00000325708	-1.01484	NA
NR1H2	ENSG00000131408	Tier 2	9606.ENSP00000253727	-1.01637	NA
LEFTY1	ENSG00000243709	Tier 3B	9606.ENSP00000272134	-1.01693	NA
GZMB	ENSG00000100453	Tier 2	9606.ENSP00000216341	-1.01693	NA
ANGPT4	ENSG00000101280	Tier 3A	9606.ENSP00000371347	-1.01759	NA
ATP1B3	ENSG00000069849	Tier 3B	9606.ENSP00000286371	-1.01767	NA
ADC	ENSG00000142920	Tier 2	9606.ENSP00000294517	-1.01777	NA
DSCAM	ENSG00000171587	Tier 3A	9606.ENSP00000383303	-1.01803	NA
GH2	ENSG00000136487	Tier 3A	9606.ENSP00000333157	-1.0186	NA
ALOX5	ENSG00000012779	Tier 1	9606.ENSP00000363512	-1.01944	NA
SULT1A3	ENSG00000261052	Tier 1	9606.ENSP00000343645	-1.02023	NA
GDF5	ENSG00000125965	Tier 3A	9606.ENSP00000363489	-1.02118	NA
MAP4K3	ENSG00000011566	Tier 1	9606.ENSP00000263881	-1.02256	NA
GABRB1	ENSG00000163288	Tier 1	9606.ENSP00000295454	-1.02256	NA
ANGPTL2	ENSG00000136859	Tier 3B	9606.ENSP00000362524	-1.0231	NA
NKTR	ENSG00000114857	Tier 2	9606.ENSP00000232978	-1.0234	NA
TYMS	ENSG00000176890	Tier 1	9606.ENSP00000315644	-1.02381	NA
DAPK1	ENSG00000196730	Tier 1	9606.ENSP00000350785	-1.02431	NA
CDK9	ENSG00000136807	Tier 1	9606.ENSP00000362361	-1.02486	NA
ITGA11	ENSG00000137809	Tier 3A	9606.ENSP00000327290	-1.0251	NA
PCSK1N	ENSG00000102109	Tier 3B	9606.ENSP00000218230	-1.02568	NA
CTSW	ENSG00000172543	Tier 3A	9606.ENSP00000311300	-1.02574	NA
HEPH	ENSG00000089472	Tier 3B	9606.ENSP00000430620	-1.02632	NA
TAS1R1	ENSG00000173662	Tier 3B	9606.ENSP00000331867	-1.02645	NA
ITM2B	ENSG00000136156	Tier 3B	9606.ENSP00000367828	-1.0268	NA
CRHR1	ENSG00000120088	Tier 1	9606.ENSP00000381333	-1.02688	NA
SLC7A5	ENSG00000103257	Tier 1	9606.ENSP00000261622	-1.02753	NA
CX3CL1	ENSG00000006210	Tier 3B	9606.ENSP00000006053	-1.02766	NA
CDC25B	ENSG00000101224	Tier 2	9606.ENSP00000245960	-1.02974	NA
LCTL	ENSG00000188501	Tier 3B	9606.ENSP00000343490	-1.03011	NA
DHH	ENSG00000139549	Tier 3A	9606.ENSP00000266991	-1.03032	NA
SELE	ENSG00000007908	Tier 1	9606.ENSP00000331736	-1.03042	NA
PPIAL4G	ENSG00000236334	Tier 2	9606.ENSP00000393845	-1.03109	NA
CYP11B1	ENSG00000160882	Tier 1	9606.ENSP00000292427	-1.03169	NA
WNT9B	ENSG00000158955	Tier 3A	9606.ENSP00000290015	-1.03204	NA
CD40LG	ENSG00000102245	Tier 1	9606.ENSP00000359663	-1.03369	NA
LACTB	ENSG00000103642	Tier 1	9606.ENSP00000261893	-1.0343	NA
XDH	ENSG00000158125	Tier 1	9606.ENSP00000368727	-1.03698	NA
CD81	ENSG00000110651	Tier 3B	9606.ENSP00000263645	-1.03869	NA
CACNA1C	ENSG00000151067	Tier 1	9606.ENSP00000266376	-1.03885	NA
TNK1	ENSG00000174292	Tier 1	9606.ENSP00000312309	-1.03888	NA
SLC1A3	ENSG00000079215	Tier 2	9606.ENSP00000265113	-1.03899	NA
SULT1A2	ENSG00000197165	Tier 1	9606.ENSP00000338742	-1.0393	NA
S100A7	ENSG00000143556	Tier 3A	9606.ENSP00000357711	-1.04103	NA
RETNLB	ENSG00000163515	Tier 3B	9606.ENSP00000295755	-1.04119	NA
CTSL	ENSG00000135047	Tier 1	9606.ENSP00000345344	-1.0414	NA
FGF18	ENSG00000156427	Tier 1	9606.ENSP00000274625	-1.04278	NA
THSD4	ENSG00000187720	Tier 3A	9606.ENSP00000261862	-1.04356	NA
NRG3	ENSG00000185737	Tier 3A	9606.ENSP00000361214	-1.04363	NA
SCNN1A	ENSG00000111319	Tier 1	9606.ENSP00000353292	-1.04407	NA
S100A12	ENSG00000163221	Tier 3B	9606.ENSP00000357726	-1.04412	NA
AHSG	ENSG00000145192	Tier 3B	9606.ENSP00000393887	-1.04428	NA
TNFRSF1B	ENSG00000028137	Tier 3B	9606.ENSP00000365435	-1.04437	NA
HCN2	ENSG00000099822	Tier 3B	9606.ENSP00000251287	-1.04482	NA
GDF7	ENSG00000143869	Tier 3A	9606.ENSP00000272224	-1.04512	NA
MAP3K4	ENSG00000085511	Tier 1	9606.ENSP00000375986	-1.04561	NA
TAS1R3	ENSG00000169962	Tier 3B	9606.ENSP00000344411	-1.04687	NA
HDC	ENSG00000140287	Tier 2	9606.ENSP00000267845	-1.04723	NA
ADAM12	ENSG00000148848	Tier 1	9606.ENSP00000357668	-1.04726	NA
PPID	ENSG00000171497	Tier 1	9606.ENSP00000303754	-1.04735	NA
LOX	ENSG00000113083	Tier 3B	9606.ENSP00000231004	-1.04748	NA
TXNRD1	ENSG00000198431	Tier 1	9606.ENSP00000434516	-1.04783	NA
MIP	ENSG00000135517	Tier 3A	9606.ENSP00000257979	-1.04803	NA
ESR1	ENSG00000091831	Tier 1	9606.ENSP00000206249	-1.04871	NA
SULT2A1	ENSG00000105398	Tier 1	9606.ENSP00000222002	-1.04946	NA
C2orf40	ENSG00000119147	Tier 3B	9606.ENSP00000238044	-1.04982	NA
LYZ	ENSG00000090382	Tier 3B	9606.ENSP00000261267	-1.05012	NA
PSMB9	ENSG00000240065	Tier 3B	9606.ENSP00000363993	-1.05047	NA
INHBE	ENSG00000139269	Tier 3A	9606.ENSP00000266646	-1.05065	NA
AR	ENSG00000169083	Tier 1	9606.ENSP00000363822	-1.05141	NA
SCPEP1	ENSG00000121064	Tier 3A	9606.ENSP00000262288	-1.05178	NA
IFNAR2	ENSG00000159110	Tier 1	9606.ENSP00000343957	-1.05196	NA
RLN2	ENSG00000107014	Tier 3B	9606.ENSP00000371040	-1.05219	NA
FCRL1	ENSG00000163534	Tier 3A	9606.ENSP00000357158	-1.05221	NA
KRT8	ENSG00000170421	Tier 1	9606.ENSP00000293308	-1.05308	NA
MRC2	ENSG00000011028	Tier 3A	9606.ENSP00000307513	-1.05333	NA
IL9R	ENSG00000124334	Tier 3B	9606.ENSP00000244174	-1.05372	NA
CRISP2	ENSG00000124490	Tier 3B	9606.ENSP00000339155	-1.05551	NA
HTR2A	ENSG00000102468	Tier 1	9606.ENSP00000367959	-1.05689	NA
PDE1C	ENSG00000154678	Tier 2	9606.ENSP00000379496	-1.05716	NA
SMOC1	ENSG00000198732	Tier 3A	9606.ENSP00000355110	-1.05834	NA
MTNR1A	ENSG00000168412	Tier 1	9606.ENSP00000302811	-1.05854	NA
DNAJB11	ENSG00000090520	Tier 3B	9606.ENSP00000265028	-1.05954	NA
RSPO2	ENSG00000147655	Tier 3B	9606.ENSP00000276659	-1.06005	NA
CYP2C9	ENSG00000138109	Tier 1	9606.ENSP00000260682	-1.06054	NA
CLCA2	ENSG00000137975	Tier 1	9606.ENSP00000359596	-1.06107	NA
PDIA6	ENSG00000143870	Tier 3A	9606.ENSP00000272227	-1.06117	NA
PAPPA	ENSG00000182752	Tier 3A	9606.ENSP00000330658	-1.06123	NA
STIM2	ENSG00000109689	Tier 3A	9606.ENSP00000417569	-1.06205	NA
SIRPA	ENSG00000198053	Tier 3A	9606.ENSP00000348307	-1.06255	NA
INHBA	ENSG00000122641	Tier 1	9606.ENSP00000242208	-1.06284	NA
PDIA3	ENSG00000167004	Tier 3B	9606.ENSP00000300289	-1.06289	NA
ALDH7A1	ENSG00000164904	Tier 1	9606.ENSP00000387123	-1.06332	NA
TPO	ENSG00000115705	Tier 1	9606.ENSP00000318820	-1.06382	NA
GDF2	ENSG00000128802	Tier 3B	9606.ENSP00000249598	-1.06397	NA
SULT1C2	ENSG00000198203	Tier 1	9606.ENSP00000319622	-1.06463	NA
GZMA	ENSG00000145649	Tier 3B	9606.ENSP00000274306	-1.06652	NA
NTRK2	ENSG00000148053	Tier 1	9606.ENSP00000277120	-1.06678	NA
RAB35	ENSG00000111737	Tier 3A	9606.ENSP00000229340	-1.06679	NA
CREG1	ENSG00000143162	Tier 3B	9606.ENSP00000359540	-1.067	NA
HSD11B1	ENSG00000117594	Tier 1	9606.ENSP00000261465	-1.06737	NA
CHEK2	ENSG00000183765	Tier 1	9606.ENSP00000372023	-1.06834	NA
PLG	ENSG00000122194	Tier 1	9606.ENSP00000308938	-1.06841	NA
CALR	ENSG00000179218	Tier 3A	9606.ENSP00000320866	-1.06848	NA
TPCN1	ENSG00000186815	Tier 3B	9606.ENSP00000438125	-1.06851	NA
PRF1	ENSG00000180644	Tier 2	9606.ENSP00000316746	-1.06919	NA
CSF3R	ENSG00000119535	Tier 1	9606.ENSP00000362195	-1.06941	NA
NOTCH2NL	ENSG00000213240	Tier 3B	9606.ENSP00000354929	-1.06941	NA
GSTZ1	ENSG00000100577	Tier 1	9606.ENSP00000216465	-1.06968	NA
IL1RL2	ENSG00000115598	Tier 3B	9606.ENSP00000264257	-1.07011	NA
SLC1A7	ENSG00000162383	Tier 2	9606.ENSP00000360549	-1.07094	NA
CEACAM8	ENSG00000124469	Tier 3B	9606.ENSP00000244336	-1.0711	NA
CAMK1G	ENSG00000008118	Tier 2	9606.ENSP00000009105	-1.07122	NA
SLC7A7	ENSG00000155465	Tier 1	9606.ENSP00000285850	-1.07149	NA
ALOX12	ENSG00000108839	Tier 2	9606.ENSP00000251535	-1.07231	NA
RTN3	ENSG00000133318	Tier 3B	9606.ENSP00000344106	-1.07247	NA
PTGIR	ENSG00000160013	Tier 1	9606.ENSP00000291294	-1.07249	NA
COL14A1	ENSG00000187955	Tier 3B	9606.ENSP00000297848	-1.07292	NA
NUCB1	ENSG00000104805	Tier 3B	9606.ENSP00000263273	-1.07323	NA
PRTN3	ENSG00000196415	Tier 3B	9606.ENSP00000234347	-1.07332	NA
TNFRSF18	ENSG00000186891	Tier 1	9606.ENSP00000328207	-1.07402	NA
BMP8B	ENSG00000116985	Tier 3B	9606.ENSP00000361915	-1.07494	NA
SLC11A2	ENSG00000110911	Tier 2	9606.ENSP00000378364	-1.0756	NA
FGF20	ENSG00000078579	Tier 3B	9606.ENSP00000180166	-1.07621	NA
MAN2B1	ENSG00000104774	Tier 1	9606.ENSP00000395473	-1.07724	NA
PDE1A	ENSG00000115252	Tier 2	9606.ENSP00000331574	-1.07829	NA
ASIC5	ENSG00000256394	Tier 3B	9606.ENSP00000442477	-1.07935	NA
MT-CO2	ENSG00000198712	Tier 2	9606.ENSP00000354876	-1.0796	NA
CSF2RA	ENSG00000198223	Tier 1	9606.ENSP00000394227	-1.07977	NA
ACACA	ENSG00000132142	Tier 2	9606.ENSP00000344789	-1.08147	NA
MAPK3	ENSG00000102882	Tier 1	9606.ENSP00000263025	-1.08181	NA
CES1	ENSG00000198848	Tier 1	9606.ENSP00000353720	-1.08213	NA
CAPZA1	ENSG00000116489	Tier 3A	9606.ENSP00000263168	-1.08285	NA
TYMP	ENSG00000025708	Tier 2	9606.ENSP00000252029	-1.083	NA
WIF1	ENSG00000156076	Tier 3A	9606.ENSP00000286574	-1.08322	NA
KBTBD7	ENSG00000120696	Tier 3B	9606.ENSP00000368797	-1.08337	NA
OPRL1	ENSG00000125510	Tier 1	9606.ENSP00000336764	-1.08413	NA
KLHL17	ENSG00000187961	Tier 3B	9606.ENSP00000343930	-1.08432	NA
HIPK3	ENSG00000110422	Tier 1	9606.ENSP00000304226	-1.08452	NA
HPSE	ENSG00000173083	Tier 2	9606.ENSP00000308107	-1.08454	NA
PDE1B	ENSG00000123360	Tier 2	9606.ENSP00000243052	-1.08485	NA
MYOC	ENSG00000034971	Tier 3B	9606.ENSP00000037502	-1.08497	NA
CEL	ENSG00000170835	Tier 2	9606.ENSP00000361151	-1.08664	NA
GUCA2A	ENSG00000197273	Tier 3B	9606.ENSP00000349493	-1.08718	NA
RBP4	ENSG00000138207	Tier 2	9606.ENSP00000360519	-1.08777	NA
CCDC80	ENSG00000091986	Tier 3A	9606.ENSP00000206423	-1.0879	NA
PLAU	ENSG00000122861	Tier 2	9606.ENSP00000361850	-1.08844	NA
PPIAL4D	ENSG00000256374	Tier 2	9606.ENSP00000439444	-1.08854	NA
BMP10	ENSG00000163217	Tier 3A	9606.ENSP00000295379	-1.08939	NA
TMEM66	ENSG00000133872	Tier 3B	9606.ENSP00000256255	-1.09003	NA
CHRNG	ENSG00000196811	Tier 1	9606.ENSP00000374145	-1.09015	NA
HPGDS	ENSG00000163106	Tier 2	9606.ENSP00000295256	-1.09029	NA
BDKRB2	ENSG00000168398	Tier 1	9606.ENSP00000307713	-1.09063	NA
CSPG4	ENSG00000173546	Tier 3B	9606.ENSP00000312506	-1.09165	NA
CA5A	ENSG00000174990	Tier 1	9606.ENSP00000309649	-1.09219	NA
PPIAL4C	ENSG00000198161	Tier 2	9606.ENSP00000358224	-1.09304	NA
PPIAL4B	ENSG00000255854	Tier 2	9606.ENSP00000443989	-1.09304	NA
PPIAL4A	ENSG00000255963	Tier 2	9606.ENSP00000439146	-1.09304	NA
ACP6	ENSG00000162836	Tier 3A	9606.ENSP00000358241	-1.09306	NA
ALDOA	ENSG00000149925	Tier 3B	9606.ENSP00000336927	-1.09312	NA
COL15A1	ENSG00000204291	Tier 3B	9606.ENSP00000364140	-1.0933	NA
NUP62	ENSG00000213024	Tier 3B	9606.ENSP00000305503	-1.09332	NA
ANGPTL1	ENSG00000116194	Tier 3B	9606.ENSP00000234816	-1.09346	NA
SRD5A1	ENSG00000145545	Tier 1	9606.ENSP00000274192	-1.09374	NA
DEFA3	ENSG00000239839	Tier 3A	9606.ENSP00000328359	-1.09422	NA
WNK4	ENSG00000126562	Tier 3B	9606.ENSP00000246914	-1.09479	NA
DYRK1B	ENSG00000105204	Tier 1	9606.ENSP00000312789	-1.09508	NA
FKBP1B	ENSG00000119782	Tier 1	9606.ENSP00000370373	-1.09516	NA
ERP44	ENSG00000023318	Tier 3A	9606.ENSP00000262455	-1.09618	NA
KLHL32	ENSG00000186231	Tier 3B	9606.ENSP00000358265	-1.09706	NA
GHRHR	ENSG00000106128	Tier 1	9606.ENSP00000320180	-1.09731	NA
COL1A1	ENSG00000108821	Tier 3A	9606.ENSP00000225964	-1.09748	NA
CD28	ENSG00000178562	Tier 1	9606.ENSP00000324890	-1.09925	NA
ENAM	ENSG00000132464	Tier 3B	9606.ENSP00000379383	-1.10027	NA
BLM	ENSG00000197299	Tier 1	9606.ENSP00000347232	-1.10069	NA
SCUBE2	ENSG00000175356	Tier 3A	9606.ENSP00000429969	-1.10073	NA
F10	ENSG00000126218	Tier 1	9606.ENSP00000364709	-1.10095	NA
FBN1	ENSG00000166147	Tier 3A	9606.ENSP00000325527	-1.10217	NA
AGTR2	ENSG00000180772	Tier 1	9606.ENSP00000360973	-1.1029	NA
BCHE	ENSG00000114200	Tier 1	9606.ENSP00000264381	-1.10347	NA
IL1A	ENSG00000115008	Tier 1	9606.ENSP00000263339	-1.10356	NA
CSF3	ENSG00000108342	Tier 3A	9606.ENSP00000225474	-1.10425	NA
HEBP1	ENSG00000013583	Tier 3B	9606.ENSP00000014930	-1.10515	NA
PI4KB	ENSG00000143393	Tier 2	9606.ENSP00000271657	-1.10573	NA
CECR1	ENSG00000093072	Tier 3B	9606.ENSP00000262607	-1.10592	NA
CHGA	ENSG00000100604	Tier 3B	9606.ENSP00000216492	-1.10632	NA
MAPK11	ENSG00000185386	Tier 1	9606.ENSP00000333685	-1.10728	NA
IFI30	ENSG00000216490	Tier 3A	9606.ENSP00000384886	-1.10771	NA
CASP6	ENSG00000138794	Tier 2	9606.ENSP00000265164	-1.10788	NA
TNFRSF13C	ENSG00000159958	Tier 1	9606.ENSP00000291232	-1.1085	NA
CPZ	ENSG00000109625	Tier 3B	9606.ENSP00000354255	-1.1106	NA
LAMB2	ENSG00000172037	Tier 1	9606.ENSP00000307156	-1.11081	NA
CA12	ENSG00000074410	Tier 1	9606.ENSP00000178638	-1.1111	NA
NRK	ENSG00000123572	Tier 3B	9606.ENSP00000438378	-1.11121	NA
TRPV5	ENSG00000127412	Tier 3B	9606.ENSP00000265310	-1.11132	NA
NMT1	ENSG00000136448	Tier 2	9606.ENSP00000258960	-1.11133	NA
PIP5K1A	ENSG00000143398	Tier 1	9606.ENSP00000357883	-1.11143	NA
FZD9	ENSG00000188763	Tier 3A	9606.ENSP00000345785	-1.11217	NA
IL2RG	ENSG00000147168	Tier 3B	9606.ENSP00000363318	-1.11245	NA
UPP1	ENSG00000183696	Tier 2	9606.ENSP00000330032	-1.11284	NA
GUCA2B	ENSG00000044012	Tier 3B	9606.ENSP00000361662	-1.11333	NA
FGF7	ENSG00000140285	Tier 3A	9606.ENSP00000267843	-1.1137	NA
FBP1	ENSG00000165140	Tier 2	9606.ENSP00000364475	-1.11382	NA
CSH2	ENSG00000213218	Tier 3A	9606.ENSP00000376623	-1.11407	NA
TM2D1	ENSG00000162604	Tier 3B	9606.ENSP00000360222	-1.11512	NA
SELP	ENSG00000174175	Tier 1	9606.ENSP00000263686	-1.11518	NA
EMR3	ENSG00000131355	Tier 3B	9606.ENSP00000253673	-1.11544	NA
ADAMTS15	ENSG00000166106	Tier 3A	9606.ENSP00000299164	-1.11568	NA
LPHN1	ENSG00000072071	Tier 3A	9606.ENSP00000340688	-1.11631	NA
WNT10A	ENSG00000135925	Tier 3A	9606.ENSP00000258411	-1.11825	NA
LTF	ENSG00000012223	Tier 3A	9606.ENSP00000231751	-1.11842	NA
CHRND	ENSG00000135902	Tier 1	9606.ENSP00000258385	-1.1197	NA
HBEGF	ENSG00000113070	Tier 1	9606.ENSP00000230990	-1.12081	NA
TYRP1	ENSG00000107165	Tier 1	9606.ENSP00000373570	-1.12104	NA
ACHE	ENSG00000087085	Tier 1	9606.ENSP00000303211	-1.12106	NA
SELL	ENSG00000188404	Tier 1	9606.ENSP00000236147	-1.12143	NA
SLC4A1	ENSG00000004939	Tier 3A	9606.ENSP00000262418	-1.12174	NA
CHST3	ENSG00000122863	Tier 1	9606.ENSP00000362207	-1.12225	NA
HTRA1	ENSG00000166033	Tier 3A	9606.ENSP00000357980	-1.12313	NA
ADAMTS13	ENSG00000160323	Tier 3A	9606.ENSP00000360997	-1.12324	NA
ADAM10	ENSG00000137845	Tier 1	9606.ENSP00000260408	-1.12408	NA
TNFSF10	ENSG00000121858	Tier 2	9606.ENSP00000241261	-1.12472	NA
AGER	ENSG00000204305	Tier 3A	9606.ENSP00000364217	-1.12509	NA
PRMT3	ENSG00000185238	Tier 2	9606.ENSP00000331879	-1.12513	NA
LAMP2	ENSG00000005893	Tier 3B	9606.ENSP00000408411	-1.12518	NA
SCGB1A1	ENSG00000149021	Tier 3A	9606.ENSP00000278282	-1.12591	NA
TUFT1	ENSG00000143367	Tier 3B	9606.ENSP00000357842	-1.12592	NA
CLEC3B	ENSG00000163815	Tier 3B	9606.ENSP00000296130	-1.12623	NA
CD209	ENSG00000090659	Tier 3B	9606.ENSP00000315477	-1.12685	NA
TH	ENSG00000180176	Tier 1	9606.ENSP00000370571	-1.12702	NA
TNFSF13	ENSG00000161955	Tier 3A	9606.ENSP00000343505	-1.12814	NA
ASIP	ENSG00000101440	Tier 3B	9606.ENSP00000364092	-1.12842	NA
CLEC4C	ENSG00000198178	Tier 3B	9606.ENSP00000353500	-1.12852	NA
ROR2	ENSG00000169071	Tier 3B	9606.ENSP00000364860	-1.12898	NA
CCNA1	ENSG00000133101	Tier 1	9606.ENSP00000255465	-1.12961	NA
IKBKB	ENSG00000104365	Tier 1	9606.ENSP00000430684	-1.12988	NA
XIAP	ENSG00000101966	Tier 1	9606.ENSP00000347858	-1.13017	NA
P4HB	ENSG00000185624	Tier 2	9606.ENSP00000327801	-1.13027	NA
BMP15	ENSG00000130385	Tier 3B	9606.ENSP00000252677	-1.1314	NA
PRKCSH	ENSG00000130175	Tier 3B	9606.ENSP00000252455	-1.13196	NA
ITGA1	ENSG00000213949	Tier 3A	9606.ENSP00000282588	-1.1323	NA
CD53	ENSG00000143119	Tier 3A	9606.ENSP00000271324	-1.13274	NA
PDE10A	ENSG00000112541	Tier 1	9606.ENSP00000438284	-1.13274	NA
KBTBD12	ENSG00000187715	Tier 3B	9606.ENSP00000385879	-1.13294	NA
PYGM	ENSG00000068976	Tier 2	9606.ENSP00000164139	-1.13395	NA
GDF9	ENSG00000164404	Tier 3B	9606.ENSP00000296875	-1.13397	NA
APH1A	ENSG00000117362	Tier 1	9606.ENSP00000358105	-1.13415	NA
CYP2C19	ENSG00000165841	Tier 1	9606.ENSP00000360372	-1.13422	NA
ADK	ENSG00000156110	Tier 2	9606.ENSP00000286621	-1.13431	NA
CNGA2	ENSG00000183862	Tier 3B	9606.ENSP00000328478	-1.13458	NA
MAPK9	ENSG00000050748	Tier 1	9606.ENSP00000389338	-1.13583	NA
AURKA	ENSG00000087586	Tier 1	9606.ENSP00000216911	-1.13613	NA
ENTPD1	ENSG00000138185	Tier 3B	9606.ENSP00000360250	-1.13632	NA
STAT3	ENSG00000168610	Tier 1	9606.ENSP00000264657	-1.13722	NA
CD36	ENSG00000135218	Tier 3A	9606.ENSP00000308165	-1.1373	NA
ANGPTL7	ENSG00000171819	Tier 3B	9606.ENSP00000366015	-1.13808	NA
FCRL2	ENSG00000132704	Tier 3A	9606.ENSP00000355157	-1.13876	NA
CALU	ENSG00000128595	Tier 3B	9606.ENSP00000420381	-1.13884	NA
RSPO1	ENSG00000169218	Tier 3B	9606.ENSP00000348944	-1.14043	NA
INSL3	ENSG00000248099	Tier 3A	9606.ENSP00000321724	-1.1415	NA
FGL2	ENSG00000127951	Tier 3B	9606.ENSP00000248598	-1.14203	NA
CYP2A7	ENSG00000198077	Tier 1	9606.ENSP00000301146	-1.14247	NA
KHDRBS1	ENSG00000121774	Tier 2	9606.ENSP00000313829	-1.14263	NA
TNXB	ENSG00000168477	Tier 3A	9606.ENSP00000407685	-1.14369	NA
SOSTDC1	ENSG00000171243	Tier 3A	9606.ENSP00000304930	-1.14384	NA
HAO1	ENSG00000101323	Tier 2	9606.ENSP00000368066	-1.14418	NA
GIF	ENSG00000134812	Tier 3A	9606.ENSP00000257248	-1.1442	NA
AOC1	ENSG00000002726	Tier 2	9606.ENSP00000354193	-1.14452	NA
ADAM33	ENSG00000149451	Tier 2	9606.ENSP00000348912	-1.14479	NA
LOXL1	ENSG00000129038	Tier 3A	9606.ENSP00000261921	-1.14539	NA
LCN2	ENSG00000148346	Tier 3B	9606.ENSP00000277480	-1.14582	NA
DYRK4	ENSG00000010219	Tier 2	9606.ENSP00000010132	-1.14656	NA
DYRK3	ENSG00000143479	Tier 2	9606.ENSP00000356076	-1.14656	NA
CYP2R1	ENSG00000186104	Tier 1	9606.ENSP00000334592	-1.14663	NA
PIP5K1C	ENSG00000186111	Tier 2	9606.ENSP00000335333	-1.14737	NA
TGFBR1	ENSG00000106799	Tier 1	9606.ENSP00000364133	-1.1474	NA
FZD4	ENSG00000174804	Tier 3B	9606.ENSP00000434034	-1.14749	NA
GDF6	ENSG00000156466	Tier 3B	9606.ENSP00000287020	-1.14777	NA
BTC	ENSG00000174808	Tier 3B	9606.ENSP00000379092	-1.14813	NA
PPIF	ENSG00000108179	Tier 2	9606.ENSP00000225174	-1.14843	NA
WNT6	ENSG00000115596	Tier 3A	9606.ENSP00000233948	-1.1486	NA
ALDH1B1	ENSG00000137124	Tier 1	9606.ENSP00000366927	-1.14907	NA
HDAC10	ENSG00000100429	Tier 1	9606.ENSP00000216271	-1.14911	NA
PDE7A	ENSG00000205268	Tier 1	9606.ENSP00000385632	-1.14935	NA
GSTO1	ENSG00000148834	Tier 1	9606.ENSP00000358727	-1.14939	NA
KRT18	ENSG00000111057	Tier 1	9606.ENSP00000373487	-1.14994	NA
NPPC	ENSG00000163273	Tier 3A	9606.ENSP00000295440	-1.15042	NA
MUC16	ENSG00000181143	Tier 1	9606.ENSP00000381008	-1.15045	NA
SLC6A16	ENSG00000063127	Tier 3B	9606.ENSP00000338627	-1.15063	NA
GPR149	ENSG00000174948	Tier 3B	9606.ENSP00000374390	-1.15069	NA
INHBC	ENSG00000175189	Tier 3A	9606.ENSP00000308716	-1.15074	NA
CHRNA10	ENSG00000129749	Tier 3B	9606.ENSP00000250699	-1.15158	NA
NCR1	ENSG00000189430	Tier 3A	9606.ENSP00000291890	-1.15171	NA
CYP2A13	ENSG00000197838	Tier 1	9606.ENSP00000332679	-1.15328	NA
RYR1	ENSG00000196218	Tier 1	9606.ENSP00000352608	-1.15372	NA
IGFBP3	ENSG00000146674	Tier 2	9606.ENSP00000370473	-1.15411	NA
OTOA	ENSG00000155719	Tier 3B	9606.ENSP00000373610	-1.15442	NA
CRTAC1	ENSG00000095713	Tier 3A	9606.ENSP00000359629	-1.15531	NA
AVP	ENSG00000101200	Tier 3B	9606.ENSP00000369647	-1.15611	NA
PEBP4	ENSG00000134020	Tier 3A	9606.ENSP00000256404	-1.1562	NA
CYP2C8	ENSG00000138115	Tier 1	9606.ENSP00000360317	-1.15707	NA
CYP39A1	ENSG00000146233	Tier 1	9606.ENSP00000275016	-1.15757	NA
RIOK1	ENSG00000124784	Tier 1	9606.ENSP00000369162	-1.15809	NA
CPS1	ENSG00000021826	Tier 1	9606.ENSP00000402608	-1.15844	NA
IL6R	ENSG00000160712	Tier 1	9606.ENSP00000357470	-1.15919	NA
PLP1	ENSG00000123560	Tier 3B	9606.ENSP00000305152	-1.15947	NA
WNT8A	ENSG00000061492	Tier 3A	9606.ENSP00000381739	-1.16018	NA
SHBG	ENSG00000129214	Tier 1	9606.ENSP00000369816	-1.1603	NA
ALPPL2	ENSG00000163286	Tier 2	9606.ENSP00000295453	-1.16076	NA
CCNB2	ENSG00000157456	Tier 1	9606.ENSP00000288207	-1.16143	NA
AMHR2	ENSG00000135409	Tier 3B	9606.ENSP00000257863	-1.1623	NA
ALDH9A1	ENSG00000143149	Tier 1	9606.ENSP00000346827	-1.16264	NA
BOLA1	ENSG00000178096	Tier 3A	9606.ENSP00000358146	-1.16266	NA
FGA	ENSG00000171560	Tier 1	9606.ENSP00000306361	-1.16374	NA
LALBA	ENSG00000167531	Tier 3B	9606.ENSP00000301046	-1.16411	NA
CDK8	ENSG00000132964	Tier 1	9606.ENSP00000370938	-1.16415	NA
CD69	ENSG00000110848	Tier 3A	9606.ENSP00000228434	-1.16468	NA
LTBP4	ENSG00000090006	Tier 3B	9606.ENSP00000311905	-1.16487	NA
VIMP	ENSG00000131871	Tier 3A	9606.ENSP00000381282	-1.165	NA
GIPR	ENSG00000010310	Tier 1	9606.ENSP00000467494	-1.16511	NA
CD300LF	ENSG00000186074	Tier 3A	9606.ENSP00000327075	-1.16511	NA
ALDH3B2	ENSG00000132746	Tier 1	9606.ENSP00000255084	-1.1653	NA
TNFSF11	ENSG00000120659	Tier 1	9606.ENSP00000239849	-1.16667	NA
ALCAM	ENSG00000170017	Tier 3B	9606.ENSP00000305988	-1.16682	NA
ADORA3	ENSG00000121933	Tier 1	9606.ENSP00000358730	-1.16683	NA
TNNI3	ENSG00000129991	Tier 2	9606.ENSP00000341838	-1.16685	NA
MFAP2	ENSG00000117122	Tier 3A	9606.ENSP00000364685	-1.1669	NA
ABCB7	ENSG00000131269	Tier 1	9606.ENSP00000253577	-1.16716	NA
ESM1	ENSG00000164283	Tier 3B	9606.ENSP00000370812	-1.16746	NA
TG	ENSG00000042832	Tier 3A	9606.ENSP00000220616	-1.16805	NA
HTR3A	ENSG00000166736	Tier 1	9606.ENSP00000347754	-1.16853	NA
TMEM123	ENSG00000152558	Tier 3B	9606.ENSP00000381204	-1.16855	NA
KCNJ14	ENSG00000182324	Tier 3B	9606.ENSP00000341479	-1.16864	NA
KCNJ2	ENSG00000123700	Tier 2	9606.ENSP00000243457	-1.17025	NA
KCNJ1	ENSG00000151704	Tier 2	9606.ENSP00000376432	-1.17057	NA
KIR2DL4	ENSG00000189013	Tier 1	9606.ENSP00000339634	-1.17069	NA
CAMK4	ENSG00000152495	Tier 2	9606.ENSP00000282356	-1.17147	NA
CA6	ENSG00000131686	Tier 1	9606.ENSP00000366662	-1.17157	NA
PDE7B	ENSG00000171408	Tier 1	9606.ENSP00000310661	-1.17177	NA
GDF15	ENSG00000130513	Tier 3A	9606.ENSP00000252809	-1.17197	NA
KSR1	ENSG00000141068	Tier 3A	9606.ENSP00000323178	-1.17212	NA
SENP7	ENSG00000138468	Tier 2	9606.ENSP00000377655	-1.17213	NA
IL1R2	ENSG00000115590	Tier 1	9606.ENSP00000330959	-1.17219	NA
STAT5A	ENSG00000126561	Tier 2	9606.ENSP00000341208	-1.17232	NA
DPP7	ENSG00000176978	Tier 2	9606.ENSP00000360635	-1.17245	NA
FKBP6	ENSG00000077800	Tier 3B	9606.ENSP00000252037	-1.17318	NA
FKBP15	ENSG00000119321	Tier 3B	9606.ENSP00000238256	-1.17321	NA
RPN2	ENSG00000118705	Tier 3A	9606.ENSP00000237530	-1.1735	NA
PDGFC	ENSG00000145431	Tier 3A	9606.ENSP00000422464	-1.17372	NA
CDK19	ENSG00000155111	Tier 1	9606.ENSP00000357907	-1.17378	NA
MAMDC2	ENSG00000165072	Tier 3B	9606.ENSP00000366387	-1.17467	NA
CYP4F2	ENSG00000186115	Tier 1	9606.ENSP00000221700	-1.17511	NA
PDE5A	ENSG00000138735	Tier 1	9606.ENSP00000347046	-1.17632	NA
SIGLEC12	ENSG00000254521	Tier 3B	9606.ENSP00000291707	-1.17633	NA
UHMK1	ENSG00000152332	Tier 3B	9606.ENSP00000420270	-1.17658	NA
HP	ENSG00000257017	Tier 3A	9606.ENSP00000348170	-1.17691	NA
AREG	ENSG00000109321	Tier 2	9606.ENSP00000264487	-1.17693	NA
ALDH3A2	ENSG00000072210	Tier 1	9606.ENSP00000345774	-1.17741	NA
DDR2	ENSG00000162733	Tier 1	9606.ENSP00000356898	-1.17764	NA
APOB	ENSG00000084674	Tier 1	9606.ENSP00000233242	-1.17864	NA
F11R	ENSG00000158769	Tier 3B	9606.ENSP00000289779	-1.17894	NA
ITGAD	ENSG00000156886	Tier 3A	9606.ENSP00000373854	-1.17922	NA
SDC1	ENSG00000115884	Tier 1	9606.ENSP00000254351	-1.17977	NA
MEPE	ENSG00000152595	Tier 3A	9606.ENSP00000354341	-1.18028	NA
OXT	ENSG00000101405	Tier 3B	9606.ENSP00000217386	-1.18074	NA
DMKN	ENSG00000161249	Tier 3A	9606.ENSP00000342012	-1.18083	NA
CSHL1	ENSG00000204414	Tier 3A	9606.ENSP00000309524	-1.18144	NA
CLCN4	ENSG00000073464	Tier 3B	9606.ENSP00000370213	-1.18262	NA
PIGT	ENSG00000124155	Tier 3A	9606.ENSP00000279036	-1.18272	NA
IL1RN	ENSG00000136689	Tier 3A	9606.ENSP00000259206	-1.18284	NA
SLC13A1	ENSG00000081800	Tier 1	9606.ENSP00000194130	-1.1832	NA
CNDP1	ENSG00000150656	Tier 3B	9606.ENSP00000351682	-1.18394	NA
MAPK8	ENSG00000107643	Tier 1	9606.ENSP00000353483	-1.18465	NA
AMPD3	ENSG00000133805	Tier 2	9606.ENSP00000379802	-1.18471	NA
GJB1	ENSG00000169562	Tier 3B	9606.ENSP00000354900	-1.18494	NA
SCARB1	ENSG00000073060	Tier 2	9606.ENSP00000261693	-1.18506	NA
TNR	ENSG00000116147	Tier 3A	9606.ENSP00000263525	-1.18628	NA
LGALS7	ENSG00000205076	Tier 3B	9606.ENSP00000367891	-1.18649	NA
TKT	ENSG00000163931	Tier 2	9606.ENSP00000405455	-1.18813	NA
KEL	ENSG00000197993	Tier 3B	9606.ENSP00000347409	-1.18828	NA
KLRD1	ENSG00000134539	Tier 3B	9606.ENSP00000338130	-1.18857	NA
CTSK	ENSG00000143387	Tier 1	9606.ENSP00000271651	-1.18947	NA
SLC40A1	ENSG00000138449	Tier 1	9606.ENSP00000261024	-1.19017	NA
CACNA1B	ENSG00000148408	Tier 1	9606.ENSP00000360406	-1.19029	NA
CD55	ENSG00000196352	Tier 1	9606.ENSP00000316333	-1.19033	NA
FOS	ENSG00000170345	Tier 2	9606.ENSP00000306245	-1.19048	NA
A1BG	ENSG00000121410	Tier 3B	9606.ENSP00000263100	-1.19204	NA
PDE3A	ENSG00000172572	Tier 1	9606.ENSP00000351957	-1.1926	NA
KCNH8	ENSG00000183960	Tier 3B	9606.ENSP00000328813	-1.19382	NA
GPC1	ENSG00000063660	Tier 3B	9606.ENSP00000264039	-1.19442	NA
KCNH6	ENSG00000173826	Tier 2	9606.ENSP00000463533	-1.19451	NA
PLA2G4B	ENSG00000243708	Tier 2	9606.ENSP00000396045	-1.19659	NA
RLN1	ENSG00000107018	Tier 3B	9606.ENSP00000223862	-1.19694	NA
GANAB	ENSG00000089597	Tier 1	9606.ENSP00000340466	-1.19713	NA
SSR2	ENSG00000163479	Tier 3A	9606.ENSP00000295702	-1.19722	NA
WFIKKN1	ENSG00000127578	Tier 3A	9606.ENSP00000324763	-1.19724	NA
GZMM	ENSG00000197540	Tier 3B	9606.ENSP00000264553	-1.19846	NA
FAT4	ENSG00000196159	Tier 3B	9606.ENSP00000377862	-1.19846	NA
PRKCZ	ENSG00000067606	Tier 1	9606.ENSP00000367830	-1.19872	NA
DKK2	ENSG00000155011	Tier 3A	9606.ENSP00000285311	-1.19909	NA
ANGPTL6	ENSG00000130812	Tier 3A	9606.ENSP00000253109	-1.19958	NA
MYT1	ENSG00000196132	Tier 1	9606.ENSP00000327465	-1.20028	NA
CMA1	ENSG00000092009	Tier 1	9606.ENSP00000250378	-1.2007	NA
EMR2	ENSG00000127507	Tier 3B	9606.ENSP00000472280	-1.20093	NA
CATSPER4	ENSG00000188782	Tier 3B	9606.ENSP00000390423	-1.20153	NA
UGT2B7	ENSG00000171234	Tier 1	9606.ENSP00000304811	-1.20192	NA
TOP1MT	ENSG00000184428	Tier 1	9606.ENSP00000328835	-1.20212	NA
F2RL1	ENSG00000164251	Tier 2	9606.ENSP00000296677	-1.20226	NA
EIF4E	ENSG00000151247	Tier 1	9606.ENSP00000425561	-1.20241	NA
REN	ENSG00000143839	Tier 1	9606.ENSP00000272190	-1.2052	NA
MCL1	ENSG00000143384	Tier 2	9606.ENSP00000358022	-1.20556	NA
TXNDC12	ENSG00000117862	Tier 3B	9606.ENSP00000360688	-1.20582	NA
HAO2	ENSG00000116882	Tier 2	9606.ENSP00000316339	-1.20608	NA
GDF11	ENSG00000135414	Tier 3B	9606.ENSP00000257868	-1.20622	NA
CD72	ENSG00000137101	Tier 3B	9606.ENSP00000259633	-1.20635	NA
HDAC11	ENSG00000163517	Tier 1	9606.ENSP00000295757	-1.20678	NA
ACLY	ENSG00000131473	Tier 2	9606.ENSP00000253792	-1.20715	NA
NTN4	ENSG00000074527	Tier 3A	9606.ENSP00000340998	-1.20743	NA
PRKACA	ENSG00000072062	Tier 1	9606.ENSP00000309591	-1.20755	NA
CSH1	ENSG00000136488	Tier 3A	9606.ENSP00000316416	-1.20764	NA
POLB	ENSG00000070501	Tier 2	9606.ENSP00000265421	-1.20799	NA
OPN1LW	ENSG00000102076	Tier 3B	9606.ENSP00000358967	-1.20869	NA
APLP1	ENSG00000105290	Tier 3B	9606.ENSP00000221891	-1.20898	NA
KSR2	ENSG00000171435	Tier 3A	9606.ENSP00000339952	-1.20916	NA
CHRD	ENSG00000090539	Tier 3A	9606.ENSP00000204604	-1.20922	NA
IL15RA	ENSG00000134470	Tier 3A	9606.ENSP00000369312	-1.20934	NA
ATP6AP2	ENSG00000182220	Tier 3B	9606.ENSP00000367697	-1.2096	NA
ITGAM	ENSG00000169896	Tier 3A	9606.ENSP00000441691	-1.20969	NA
SLC22A5	ENSG00000197375	Tier 1	9606.ENSP00000245407	-1.20989	NA
SRC	ENSG00000197122	Tier 1	9606.ENSP00000350941	-1.21011	NA
CSF2	ENSG00000164400	Tier 1	9606.ENSP00000296871	-1.2106	NA
IKBKE	ENSG00000143466	Tier 1	9606.ENSP00000356087	-1.21142	NA
LAMA2	ENSG00000196569	Tier 1	9606.ENSP00000400365	-1.2118	NA
MPI	ENSG00000178802	Tier 2	9606.ENSP00000318318	-1.21253	NA
COL10A1	ENSG00000123500	Tier 3B	9606.ENSP00000243222	-1.21339	NA
IFNB1	ENSG00000171855	Tier 3B	9606.ENSP00000369581	-1.21453	NA
CPXM1	ENSG00000088882	Tier 3A	9606.ENSP00000369979	-1.2147	NA
ATP7A	ENSG00000165240	Tier 1	9606.ENSP00000345728	-1.2147	NA
PYGL	ENSG00000100504	Tier 2	9606.ENSP00000216392	-1.21528	NA
JAG1	ENSG00000101384	Tier 3A	9606.ENSP00000254958	-1.21541	NA
IFNGR1	ENSG00000027697	Tier 1	9606.ENSP00000356713	-1.21595	NA
CA2	ENSG00000104267	Tier 1	9606.ENSP00000285379	-1.21622	NA
THPO	ENSG00000090534	Tier 1	9606.ENSP00000204615	-1.21688	NA
PDE6C	ENSG00000095464	Tier 1	9606.ENSP00000360502	-1.21717	NA
SLC6A9	ENSG00000196517	Tier 1	9606.ENSP00000353791	-1.2174	NA
CTSB	ENSG00000164733	Tier 1	9606.ENSP00000342070	-1.21743	NA
STK36	ENSG00000163482	Tier 2	9606.ENSP00000295709	-1.21761	NA
CSF1	ENSG00000184371	Tier 1	9606.ENSP00000327513	-1.21775	NA
SLC2A5	ENSG00000142583	Tier 1	9606.ENSP00000366641	-1.21784	NA
GYPB	ENSG00000250361	Tier 3B	9606.ENSP00000427690	-1.21792	NA
FN1	ENSG00000115414	Tier 1	9606.ENSP00000346839	-1.21793	NA
STK17A	ENSG00000164543	Tier 1	9606.ENSP00000319192	-1.21817	NA
GGH	ENSG00000137563	Tier 2	9606.ENSP00000260118	-1.2182	NA
GPC5	ENSG00000179399	Tier 3A	9606.ENSP00000366267	-1.21939	NA
SNRK	ENSG00000163788	Tier 2	9606.ENSP00000296088	-1.22023	NA
MAPK14	ENSG00000112062	Tier 1	9606.ENSP00000229794	-1.22023	NA
P2RY2	ENSG00000175591	Tier 1	9606.ENSP00000310305	-1.2209	NA
AGPAT2	ENSG00000169692	Tier 2	9606.ENSP00000360761	-1.22158	NA
FBN2	ENSG00000138829	Tier 3A	9606.ENSP00000262464	-1.2219	NA
KLHL29	ENSG00000119771	Tier 3B	9606.ENSP00000420659	-1.22246	NA
LDHA	ENSG00000134333	Tier 2	9606.ENSP00000445175	-1.2225	NA
BIRC3	ENSG00000023445	Tier 1	9606.ENSP00000263464	-1.22289	NA
PSENEN	ENSG00000205155	Tier 1	9606.ENSP00000222266	-1.22312	NA
TPCN2	ENSG00000162341	Tier 3B	9606.ENSP00000294309	-1.22327	NA
MTNR1B	ENSG00000134640	Tier 1	9606.ENSP00000257068	-1.22332	NA
FAAH	ENSG00000117480	Tier 1	9606.ENSP00000243167	-1.22338	NA
ACVR2A	ENSG00000121989	Tier 2	9606.ENSP00000241416	-1.22339	NA
BST1	ENSG00000109743	Tier 3A	9606.ENSP00000265016	-1.22345	NA
DPP9	ENSG00000142002	Tier 1	9606.ENSP00000262960	-1.22446	NA
CLEC11A	ENSG00000105472	Tier 3B	9606.ENSP00000250340	-1.22448	NA
ADRB2	ENSG00000169252	Tier 1	9606.ENSP00000305372	-1.2245	NA
MAP3K13	ENSG00000073803	Tier 1	9606.ENSP00000265026	-1.22509	NA
AURKB	ENSG00000178999	Tier 1	9606.ENSP00000463999	-1.22514	NA
FKBP14	ENSG00000106080	Tier 3A	9606.ENSP00000222803	-1.22518	NA
SFRP5	ENSG00000120057	Tier 3B	9606.ENSP00000266066	-1.22536	NA
PSEN2	ENSG00000143801	Tier 1	9606.ENSP00000355747	-1.22605	NA
HCN1	ENSG00000164588	Tier 2	9606.ENSP00000307342	-1.22672	NA
COPA	ENSG00000122218	Tier 3B	9606.ENSP00000357048	-1.22696	NA
CDH1	ENSG00000039068	Tier 3A	9606.ENSP00000261769	-1.22697	NA
DYRK1A	ENSG00000157540	Tier 1	9606.ENSP00000381932	-1.22737	NA
IL5RA	ENSG00000091181	Tier 1	9606.ENSP00000256452	-1.22751	NA
TNN	ENSG00000120332	Tier 3A	9606.ENSP00000239462	-1.2279	NA
AHCY	ENSG00000101444	Tier 2	9606.ENSP00000217426	-1.22817	NA
IL15	ENSG00000164136	Tier 1	9606.ENSP00000296545	-1.22852	NA
GRIN2C	ENSG00000161509	Tier 1	9606.ENSP00000293190	-1.22854	NA
WT1	ENSG00000184937	Tier 1	9606.ENSP00000331327	-1.22866	NA
DPP10	ENSG00000175497	Tier 3B	9606.ENSP00000376855	-1.22879	NA
ASIC2	ENSG00000108684	Tier 3A	9606.ENSP00000225823	-1.22917	NA
ERBB2	ENSG00000141736	Tier 1	9606.ENSP00000269571	-1.22951	NA
CYP26B1	ENSG00000003137	Tier 3B	9606.ENSP00000001146	-1.23027	NA
HSPD1	ENSG00000144381	Tier 3B	9606.ENSP00000340019	-1.23064	NA
IFNA2	ENSG00000188379	Tier 1	9606.ENSP00000369554	-1.23216	NA
WNT8B	ENSG00000075290	Tier 3B	9606.ENSP00000340677	-1.23382	NA
TULP3	ENSG00000078246	Tier 3B	9606.ENSP00000380321	-1.2339	NA
IL23A	ENSG00000110944	Tier 1	9606.ENSP00000228534	-1.23434	NA
CYP4Z1	ENSG00000186160	Tier 1	9606.ENSP00000334246	-1.2344	NA
SLPI	ENSG00000124107	Tier 3B	9606.ENSP00000342082	-1.23442	NA
SIGLEC1	ENSG00000088827	Tier 3B	9606.ENSP00000341141	-1.23472	NA
FKBP11	ENSG00000134285	Tier 3B	9606.ENSP00000449751	-1.23515	NA
FAAH2	ENSG00000165591	Tier 2	9606.ENSP00000364035	-1.23543	NA
NPSR1	ENSG00000187258	Tier 1	9606.ENSP00000352839	-1.23607	NA
GSR	ENSG00000104687	Tier 1	9606.ENSP00000221130	-1.2364	NA
IMPA1	ENSG00000133731	Tier 1	9606.ENSP00000408526	-1.2375	NA
CA8	ENSG00000178538	Tier 3A	9606.ENSP00000314407	-1.23779	NA
P4HTM	ENSG00000178467	Tier 1	9606.ENSP00000341422	-1.23867	NA
CHRNB1	ENSG00000170175	Tier 1	9606.ENSP00000304290	-1.23907	NA
BIRC8	ENSG00000163098	Tier 2	9606.ENSP00000412957	-1.23983	NA
OCLN	ENSG00000197822	Tier 3B	9606.ENSP00000347379	-1.24028	NA
ITGA3	ENSG00000005884	Tier 3B	9606.ENSP00000007722	-1.24042	NA
G6PD	ENSG00000160211	Tier 2	9606.ENSP00000377192	-1.24043	NA
GRN	ENSG00000030582	Tier 3A	9606.ENSP00000053867	-1.24072	NA
CEACAM1	ENSG00000079385	Tier 3B	9606.ENSP00000161559	-1.24227	NA
PHKG2	ENSG00000156873	Tier 1	9606.ENSP00000455607	-1.24319	NA
RECQL	ENSG00000004700	Tier 1	9606.ENSP00000395449	-1.24401	NA
CACNG2	ENSG00000166862	Tier 3B	9606.ENSP00000300105	-1.24444	NA
BMP3	ENSG00000152785	Tier 3A	9606.ENSP00000282701	-1.24607	NA
WNK1	ENSG00000060237	Tier 3A	9606.ENSP00000313059	-1.24673	NA
CD68	ENSG00000129226	Tier 3A	9606.ENSP00000250092	-1.24685	NA
CLCN1	ENSG00000188037	Tier 2	9606.ENSP00000339867	-1.24701	NA
LRP8	ENSG00000157193	Tier 3A	9606.ENSP00000303634	-1.24736	NA
WNK3	ENSG00000196632	Tier 2	9606.ENSP00000346667	-1.24806	NA
DYRK2	ENSG00000127334	Tier 1	9606.ENSP00000342105	-1.24963	NA
FGF1	ENSG00000113578	Tier 1	9606.ENSP00000338548	-1.24974	NA
STK17B	ENSG00000081320	Tier 1	9606.ENSP00000263955	-1.24994	NA
KCNH4	ENSG00000089558	Tier 3B	9606.ENSP00000264661	-1.25046	NA
GPX3	ENSG00000211445	Tier 1	9606.ENSP00000373477	-1.25076	NA
SPARC	ENSG00000113140	Tier 3B	9606.ENSP00000231061	-1.25089	NA
KLHL23	ENSG00000213160	Tier 3B	9606.ENSP00000272797	-1.25148	NA
ALOX15	ENSG00000161905	Tier 1	9606.ENSP00000293761	-1.25193	NA
GFER	ENSG00000127554	Tier 1	9606.ENSP00000248114	-1.25205	NA
ALDH1A2	ENSG00000128918	Tier 1	9606.ENSP00000249750	-1.25221	NA
NAT1	ENSG00000171428	Tier 1	9606.ENSP00000443194	-1.25243	NA
KALRN	ENSG00000160145	Tier 3A	9606.ENSP00000240874	-1.25252	NA
GSTT2B	ENSG00000133433	Tier 1	9606.ENSP00000290765	-1.25252	NA
PPIA	ENSG00000196262	Tier 1	9606.ENSP00000419425	-1.25278	NA
MAPK6	ENSG00000069956	Tier 2	9606.ENSP00000261845	-1.25328	NA
INS	ENSG00000254647	Tier 3A	9606.ENSP00000250971	-1.25336	NA
PTBP1	ENSG00000011304	Tier 2	9606.ENSP00000349428	-1.2536	NA
AFM	ENSG00000079557	Tier 3A	9606.ENSP00000226355	-1.25529	NA
PGLYRP2	ENSG00000161031	Tier 3B	9606.ENSP00000345968	-1.25586	NA
NRP1	ENSG00000099250	Tier 1	9606.ENSP00000265371	-1.25677	NA
DHRS7C	ENSG00000184544	Tier 1	9606.ENSP00000327975	-1.25849	NA
ATP2B3	ENSG00000067842	Tier 3A	9606.ENSP00000263519	-1.25883	NA
BPHL	ENSG00000137274	Tier 3B	9606.ENSP00000369739	-1.25919	NA
KIRREL2	ENSG00000126259	Tier 3B	9606.ENSP00000353331	-1.25945	NA
COL3A1	ENSG00000168542	Tier 3B	9606.ENSP00000304408	-1.25993	NA
PPIL3	ENSG00000240344	Tier 2	9606.ENSP00000286175	-1.26014	NA
CD80	ENSG00000121594	Tier 1	9606.ENSP00000264246	-1.26061	NA
FCER2	ENSG00000104921	Tier 1	9606.ENSP00000264072	-1.26193	NA
GLI2	ENSG00000074047	Tier 2	9606.ENSP00000354586	-1.26292	NA
CLSTN1	ENSG00000171603	Tier 3B	9606.ENSP00000366513	-1.26315	NA
FKBP2	ENSG00000173486	Tier 2	9606.ENSP00000310935	-1.26335	NA
AMELX	ENSG00000125363	Tier 3B	9606.ENSP00000370088	-1.26412	NA
EMILIN1	ENSG00000138080	Tier 3B	9606.ENSP00000369677	-1.26462	NA
ADCY1	ENSG00000164742	Tier 1	9606.ENSP00000297323	-1.26467	NA
SFTPB	ENSG00000168878	Tier 3B	9606.ENSP00000377409	-1.26592	NA
HTR7	ENSG00000148680	Tier 1	9606.ENSP00000337949	-1.26748	NA
ULK2	ENSG00000083290	Tier 1	9606.ENSP00000354877	-1.26752	NA
TXNRD2	ENSG00000184470	Tier 2	9606.ENSP00000383365	-1.26761	NA
MBL2	ENSG00000165471	Tier 3A	9606.ENSP00000363079	-1.26813	NA
CHEK1	ENSG00000149554	Tier 1	9606.ENSP00000388648	-1.26813	NA
SCG3	ENSG00000104112	Tier 3A	9606.ENSP00000220478	-1.26843	NA
MFNG	ENSG00000100060	Tier 3A	9606.ENSP00000349490	-1.26863	NA
LGALS8	ENSG00000116977	Tier 3B	9606.ENSP00000309576	-1.27002	NA
SLC22A18	ENSG00000110628	Tier 1	9606.ENSP00000307859	-1.27064	NA
MMP7	ENSG00000137673	Tier 1	9606.ENSP00000260227	-1.27071	NA
CLCN3	ENSG00000109572	Tier 3B	9606.ENSP00000261514	-1.27167	NA
CCR4	ENSG00000183813	Tier 1	9606.ENSP00000332659	-1.27281	NA
ADAMTS10	ENSG00000142303	Tier 3A	9606.ENSP00000270328	-1.27288	NA
GPR50	ENSG00000102195	Tier 2	9606.ENSP00000218316	-1.27294	NA
TPH1	ENSG00000129167	Tier 2	9606.ENSP00000250018	-1.27322	NA
CYP4A22	ENSG00000162365	Tier 3B	9606.ENSP00000360958	-1.27328	NA
KLHL6	ENSG00000172578	Tier 3B	9606.ENSP00000341342	-1.27386	NA
KCNK7	ENSG00000173338	Tier 3B	9606.ENSP00000344820	-1.274	NA
IFNA14	ENSG00000228083	Tier 3B	9606.ENSP00000369571	-1.27503	NA
FKBP7	ENSG00000079150	Tier 3B	9606.ENSP00000413152	-1.27528	NA
SIGLEC7	ENSG00000168995	Tier 3B	9606.ENSP00000323328	-1.27533	NA
PRPF4B	ENSG00000112739	Tier 1	9606.ENSP00000337194	-1.27533	NA
ATP2B4	ENSG00000058668	Tier 3A	9606.ENSP00000350310	-1.27561	NA
LPAR6	ENSG00000139679	Tier 3B	9606.ENSP00000344353	-1.27565	NA
ALDH1L2	ENSG00000136010	Tier 3B	9606.ENSP00000258494	-1.27656	NA
KL	ENSG00000133116	Tier 3B	9606.ENSP00000369442	-1.2769	NA
PDE4B	ENSG00000184588	Tier 1	9606.ENSP00000332116	-1.27694	NA
ALDH2	ENSG00000111275	Tier 1	9606.ENSP00000261733	-1.27777	NA
GGPS1	ENSG00000152904	Tier 2	9606.ENSP00000282841	-1.27794	NA
THBS1	ENSG00000137801	Tier 3A	9606.ENSP00000260356	-1.27812	NA
COL4A5	ENSG00000188153	Tier 3B	9606.ENSP00000331902	-1.27815	NA
IGF2	ENSG00000167244	Tier 1	9606.ENSP00000391826	-1.27913	NA
CCK	ENSG00000187094	Tier 3A	9606.ENSP00000335657	-1.28031	NA
LY86	ENSG00000112799	Tier 3A	9606.ENSP00000230568	-1.28124	NA
LRP1	ENSG00000123384	Tier 3A	9606.ENSP00000243077	-1.28155	NA
TMED10	ENSG00000170348	Tier 3A	9606.ENSP00000303145	-1.28169	NA
PMCH	ENSG00000183395	Tier 3B	9606.ENSP00000332225	-1.28279	NA
PLXNC1	ENSG00000136040	Tier 3B	9606.ENSP00000258526	-1.28314	NA
COL18A1	ENSG00000182871	Tier 3A	9606.ENSP00000347665	-1.28321	NA
DNAJA1	ENSG00000086061	Tier 2	9606.ENSP00000369127	-1.28388	NA
CD14	ENSG00000170458	Tier 1	9606.ENSP00000304236	-1.28494	NA
ZP4	ENSG00000116996	Tier 3A	9606.ENSP00000355529	-1.28541	NA
SLC6A17	ENSG00000197106	Tier 3B	9606.ENSP00000330199	-1.28631	NA
RIOK2	ENSG00000058729	Tier 1	9606.ENSP00000283109	-1.28701	NA
LEPRE1	ENSG00000117385	Tier 3B	9606.ENSP00000296388	-1.28752	NA
SLC10A1	ENSG00000100652	Tier 1	9606.ENSP00000216540	-1.28891	NA
SLC10A2	ENSG00000125255	Tier 1	9606.ENSP00000245312	-1.28891	NA
PPIL6	ENSG00000185250	Tier 3B	9606.ENSP00000392257	-1.28986	NA
SMN2	ENSG00000205571	Tier 1	9606.ENSP00000370119	-1.2899	NA
EDAR	ENSG00000135960	Tier 3A	9606.ENSP00000258443	-1.28991	NA
IL7	ENSG00000104432	Tier 3A	9606.ENSP00000263851	-1.28995	NA
IFNA8	ENSG00000120242	Tier 1	9606.ENSP00000369553	-1.29023	NA
GSTA3	ENSG00000174156	Tier 1	9606.ENSP00000211122	-1.29146	NA
PRNP	ENSG00000171867	Tier 3A	9606.ENSP00000368752	-1.29198	NA
PDE6A	ENSG00000132915	Tier 2	9606.ENSP00000255266	-1.29246	NA
SLC1A1	ENSG00000106688	Tier 1	9606.ENSP00000262352	-1.2938	NA
XYLT1	ENSG00000103489	Tier 3B	9606.ENSP00000261381	-1.29436	NA
AQP1	ENSG00000240583	Tier 3A	9606.ENSP00000311165	-1.29448	NA
ITGB1	ENSG00000150093	Tier 1	9606.ENSP00000303351	-1.29449	NA
ADCY5	ENSG00000173175	Tier 1	9606.ENSP00000419361	-1.2963	NA
PGF	ENSG00000119630	Tier 1	9606.ENSP00000451040	-1.29633	NA
HSPB1	ENSG00000106211	Tier 1	9606.ENSP00000248553	-1.29675	NA
LY96	ENSG00000154589	Tier 3B	9606.ENSP00000284818	-1.29685	NA
ADCK4	ENSG00000123815	Tier 2	9606.ENSP00000315118	-1.29699	NA
BTD	ENSG00000169814	Tier 3A	9606.ENSP00000306477	-1.29705	NA
NLGN4Y	ENSG00000165246	Tier 3B	9606.ENSP00000342535	-1.29789	NA
TBK1	ENSG00000183735	Tier 1	9606.ENSP00000329967	-1.29803	NA
FCGR3A	ENSG00000203747	Tier 3A	9606.ENSP00000356946	-1.29902	NA
MAPK13	ENSG00000156711	Tier 1	9606.ENSP00000211287	-1.29944	NA
SDF2	ENSG00000132581	Tier 3B	9606.ENSP00000247020	-1.2998	NA
LNPEP	ENSG00000113441	Tier 2	9606.ENSP00000231368	-1.29988	NA
SNAP29	ENSG00000099940	Tier 3B	9606.ENSP00000215730	-1.30004	NA
DPP6	ENSG00000130226	Tier 3B	9606.ENSP00000367001	-1.30007	NA
ARAF	ENSG00000078061	Tier 2	9606.ENSP00000366244	-1.30041	NA
RNASE1	ENSG00000129538	Tier 3A	9606.ENSP00000344193	-1.30109	NA
GC	ENSG00000145321	Tier 1	9606.ENSP00000421725	-1.30127	NA
TWSG1	ENSG00000128791	Tier 3A	9606.ENSP00000262120	-1.3016	NA
POR	ENSG00000127948	Tier 1	9606.ENSP00000419970	-1.30197	NA
STK35	ENSG00000125834	Tier 1	9606.ENSP00000370891	-1.30198	NA
SPN	ENSG00000197471	Tier 3B	9606.ENSP00000353238	-1.30202	NA
B4GALT1	ENSG00000086062	Tier 3A	9606.ENSP00000369055	-1.30216	NA
APCS	ENSG00000132703	Tier 3B	9606.ENSP00000255040	-1.3023	NA
KCNH3	ENSG00000135519	Tier 3B	9606.ENSP00000257981	-1.30247	NA
CASP7	ENSG00000165806	Tier 2	9606.ENSP00000358327	-1.30266	NA
SERPINE1	ENSG00000106366	Tier 2	9606.ENSP00000223095	-1.30281	NA
ATP6V1B1	ENSG00000116039	Tier 2	9606.ENSP00000234396	-1.30327	NA
SVOP	ENSG00000166111	Tier 3B	9606.ENSP00000299134	-1.30358	NA
LAMA1	ENSG00000101680	Tier 1	9606.ENSP00000374309	-1.30399	NA
NTN3	ENSG00000162068	Tier 3B	9606.ENSP00000293973	-1.30399	NA
PDE4C	ENSG00000105650	Tier 1	9606.ENSP00000347689	-1.30471	NA
KCNH5	ENSG00000140015	Tier 3B	9606.ENSP00000321427	-1.30502	NA
AKR1A1	ENSG00000117448	Tier 1	9606.ENSP00000312606	-1.3053	NA
BIRC5	ENSG00000089685	Tier 2	9606.ENSP00000301633	-1.30571	NA
BDNF	ENSG00000176697	Tier 3A	9606.ENSP00000414303	-1.30712	NA
CTSE	ENSG00000196188	Tier 1	9606.ENSP00000350911	-1.30722	NA
LAMB1	ENSG00000091136	Tier 1	9606.ENSP00000222399	-1.3075	NA
COL5A1	ENSG00000130635	Tier 3A	9606.ENSP00000360882	-1.30761	NA
ERBB4	ENSG00000178568	Tier 1	9606.ENSP00000342235	-1.30769	NA
FSTL3	ENSG00000070404	Tier 3B	9606.ENSP00000166139	-1.30798	NA
IL34	ENSG00000157368	Tier 3B	9606.ENSP00000288098	-1.30905	NA
DPYD	ENSG00000188641	Tier 1	9606.ENSP00000359211	-1.30913	NA
GPX4	ENSG00000167468	Tier 1	9606.ENSP00000346103	-1.30967	NA
PTK2	ENSG00000169398	Tier 1	9606.ENSP00000341189	-1.31044	NA
LECT1	ENSG00000136110	Tier 3B	9606.ENSP00000367198	-1.31056	NA
CAMK2B	ENSG00000058404	Tier 1	9606.ENSP00000379098	-1.31091	NA
PVRL1	ENSG00000110400	Tier 3B	9606.ENSP00000264025	-1.31163	NA
PRKD3	ENSG00000115825	Tier 1	9606.ENSP00000234179	-1.3122	NA
MAPK15	ENSG00000181085	Tier 1	9606.ENSP00000337691	-1.31258	NA
HSPA5	ENSG00000044574	Tier 2	9606.ENSP00000324173	-1.31282	NA
CYP4X1	ENSG00000186377	Tier 3B	9606.ENSP00000360968	-1.31333	NA
PDE9A	ENSG00000160191	Tier 2	9606.ENSP00000291539	-1.31401	NA
CRB2	ENSG00000148204	Tier 3A	9606.ENSP00000362734	-1.31418	NA
CD46	ENSG00000117335	Tier 3A	9606.ENSP00000313875	-1.31434	NA
CD63	ENSG00000135404	Tier 3A	9606.ENSP00000257857	-1.31438	NA
PROCR	ENSG00000101000	Tier 3A	9606.ENSP00000216968	-1.31473	NA
PDE11A	ENSG00000128655	Tier 1	9606.ENSP00000286063	-1.31487	NA
TNFRSF17	ENSG00000048462	Tier 3A	9606.ENSP00000053243	-1.31531	NA
ALDH1A1	ENSG00000165092	Tier 1	9606.ENSP00000297785	-1.31556	NA
CRELD2	ENSG00000184164	Tier 3A	9606.ENSP00000383938	-1.31604	NA
PDGFD	ENSG00000170962	Tier 3A	9606.ENSP00000376865	-1.31634	NA
TTN	ENSG00000155657	Tier 3A	9606.ENSP00000343764	-1.31736	NA
TOP2A	ENSG00000131747	Tier 1	9606.ENSP00000411532	-1.31819	NA
FCER1A	ENSG00000179639	Tier 3A	9606.ENSP00000357097	-1.31849	NA
TNFRSF25	ENSG00000215788	Tier 3A	9606.ENSP00000367013	-1.31927	NA
TTBK1	ENSG00000146216	Tier 3B	9606.ENSP00000259750	-1.32339	NA
MC1R	ENSG00000258839	Tier 1	9606.ENSP00000451605	-1.32419	NA
COL4A2	ENSG00000134871	Tier 3A	9606.ENSP00000353654	-1.32453	NA
ASIC3	ENSG00000213199	Tier 2	9606.ENSP00000297512	-1.32656	NA
ITIH4	ENSG00000055955	Tier 3A	9606.ENSP00000266041	-1.32726	NA
GANC	ENSG00000214013	Tier 3B	9606.ENSP00000326227	-1.32751	NA
KCNJ8	ENSG00000121361	Tier 1	9606.ENSP00000240662	-1.32837	NA
FBLN1	ENSG00000077942	Tier 3A	9606.ENSP00000331544	-1.32844	NA
MYLK	ENSG00000065534	Tier 1	9606.ENSP00000353452	-1.32897	NA
MAPK12	ENSG00000188130	Tier 1	9606.ENSP00000215659	-1.32965	NA
EDIL3	ENSG00000164176	Tier 3A	9606.ENSP00000296591	-1.32974	NA
GREM2	ENSG00000180875	Tier 3A	9606.ENSP00000318650	-1.33093	NA
KIF11	ENSG00000138160	Tier 1	9606.ENSP00000260731	-1.33109	NA
SRGN	ENSG00000122862	Tier 3B	9606.ENSP00000242465	-1.33122	NA
OPN4	ENSG00000122375	Tier 3B	9606.ENSP00000361141	-1.3313	NA
PIK3R1	ENSG00000145675	Tier 2	9606.ENSP00000274335	-1.33162	NA
IL37	ENSG00000125571	Tier 3A	9606.ENSP00000263326	-1.33235	NA
PHKG1	ENSG00000164776	Tier 1	9606.ENSP00000297373	-1.33299	NA
ULK1	ENSG00000177169	Tier 1	9606.ENSP00000324560	-1.33328	NA
CA14	ENSG00000118298	Tier 1	9606.ENSP00000358107	-1.33347	NA
PXDNL	ENSG00000147485	Tier 3B	9606.ENSP00000348645	-1.33358	NA
EGLN2	ENSG00000269858	Tier 1	9606.ENSP00000307080	-1.33384	NA
[truncated: 2,027 more rows]
