# Supplementary material for: An integrative machine learning approach for prediction of toxicity-related drug safety
Source: Life Sci Alliance. 2018 Nov 28;1(6):e201800098. doi: 10.26508/lsa.201800098 (PMC6262234; doi:10.26508/lsa.201800098)
Supplement: Supplementary file 3 [file LSA-2018-00098_TableS3.xlsx]

## Sheet: Sheet1
Drug name	Evidence source (PubMed or DOI identifier)
alosetron	https://www.ncbi.nlm.nih.gov/pubmed/21180598
aprobarbital	doi:10.1345/aph.1M436
astemizole	https://www.ncbi.nlm.nih.gov/pubmed/28006924
bicalutamide	https://www.ncbi.nlm.nih.gov/pubmed/27099451
bromfenac	https://www.ncbi.nlm.nih.gov/pubmed/10427465
bromocriptine mesylate	https://www.ncbi.nlm.nih.gov/pubmed/11338413
bupropion	https://www.ncbi.nlm.nih.gov/pubmed/17967156
celecoxib	https://www.ncbi.nlm.nih.gov/pubmed/19701976
cyproheptadine	https://www.ncbi.nlm.nih.gov/pubmed/17967156
diclofenac sodium	https://www.ncbi.nlm.nih.gov/pubmed/17967156
domperidone	https://www.ncbi.nlm.nih.gov/pubmed/24015213
etretinate	https://www.ncbi.nlm.nih.gov/pubmed/3652901
felbamate	https://www.ncbi.nlm.nih.gov/pubmed/15606131
fenoterol	https://www.ncbi.nlm.nih.gov/pubmed/24015213
flunitrazepam	https://doi.org/10.1002/9781118105955
fluvoxamine	https://www.ncbi.nlm.nih.gov/pubmed/22700542
gemfibrozil	https://www.ncbi.nlm.nih.gov/pubmed/17133470
indometacin	https://doi.org/10.1038/clpt.2008.233
isotretinoin	https://www.ncbi.nlm.nih.gov/pubmed/15720936
ketorolac	https://www.ncbi.nlm.nih.gov/pubmed/17133470
letrozole	https://www.ncbi.nlm.nih.gov/pubmed/25121052
lumiracoxib	https://www.ncbi.nlm.nih.gov/pubmed/24099014
megestrol acetate	https://www.ncbi.nlm.nih.gov/pubmed/24015213
metamfetamine	doi:10.1001/jama.1985.03360040107041
methylphenidate	https://www.ncbi.nlm.nih.gov/pubmed/18058301
metipranolol	https://www.ncbi.nlm.nih.gov/pubmed/8807144
mianserin	https://www.ncbi.nlm.nih.gov/pubmed/2507056
nefazodone	https://www.ncbi.nlm.nih.gov/pubmed/17967156
omeprazole	https://www.ncbi.nlm.nih.gov/pubmed/17967156
phenobarbital	https://www.ncbi.nlm.nih.gov/pubmed/17967156
phenylbutazone	https://www.ncbi.nlm.nih.gov/pubmed/15931767
practolol	https://www.ncbi.nlm.nih.gov/pubmed/1467132
terfenadine	https://www.ncbi.nlm.nih.gov/pubmed/28006924
tolcapone	https://www.ncbi.nlm.nih.gov/pubmed/15931767
trazodone	https://www.ncbi.nlm.nih.gov/pubmed/17967156
troglitazone	https://www.ncbi.nlm.nih.gov/pubmed/21262925
vigabatrin	https://www.ncbi.nlm.nih.gov/pubmed/19262378
ximelagatran	https://www.ncbi.nlm.nih.gov/pubmed/20020269
